# Supplementary material for: Is it feasible to conduct a randomised controlled trial of pretransplant exercise (prehabilitation) for patients with multiple myeloma awaiting autologous haematopoietic stem cell transplantation? Protocol for the PREeMPT study
Source: PubMed Central journal article supplement (PMC5855173; doi:10.1136/bmjopen-2017-021333), 2018-03-09
Supplement: bmjopen-2017-021333.draft_revisions.pdf [file bmjopen-2017-021333.draft_revisions.pdf]

# BMJ Open

BMJ Open is committed to open peer review. As part of this commitment we make the peer review history of every article we publish publicly available.

When an article is published we post the peer reviewers' comments and the authors' responses online. We also post the versions of the paper that were used during peer review. These are the versions that the peer review comments apply to.

The versions of the paper that follow are the versions that were submitted during the peer review process. They are not the versions of record or the final published versions. They should not be cited or distributed as the published version of this manuscript.

BMJ Open is an open access journal and the full, final, typeset and author-corrected version of record of the manuscript is available on our site with no access controls, subscription charges or pay-per-view fees (<http://bmjopen.bmj.com>).

If you have any questions on BMJ Open's open peer review process please email [info.bmjopen@bmj.com](mailto:info.bmjopen@bmj.com)

# BMJ Open

## Pathways and cost-effectiveness of routine lung cancer inpatient care in rural Anhui, China: a retrospective cohort study protocol

|                               |                                                                                                                                                                                                                                                                                                                                                                                                                                                                                                                                                                                      |
|-------------------------------|--------------------------------------------------------------------------------------------------------------------------------------------------------------------------------------------------------------------------------------------------------------------------------------------------------------------------------------------------------------------------------------------------------------------------------------------------------------------------------------------------------------------------------------------------------------------------------------|
| Journal:                      | <i>BMJ Open</i>                                                                                                                                                                                                                                                                                                                                                                                                                                                                                                                                                                      |
| Manuscript ID                 | bmjopen-2017-018519                                                                                                                                                                                                                                                                                                                                                                                                                                                                                                                                                                  |
| Article Type:                 | Protocol                                                                                                                                                                                                                                                                                                                                                                                                                                                                                                                                                                             |
| Date Submitted by the Author: | 05-Jul-2017                                                                                                                                                                                                                                                                                                                                                                                                                                                                                                                                                                          |
| Complete List of Authors:     | Shen, XingRong; Anhui Medical University School of Health Service Management<br>Diao, MengJie; Anhui Medical University School of Health Service Management<br>Feng, Rui; Anhui Medical University, Library Department of Literature Retrieval and Analysis<br>Lu, ManMan ; Anhui Medical University School of Health Service Management<br>Zhang, PanPan ; Anhui Medical University School of Health Service Management<br>Jiang, Tao ; Anhui Medical University School of Health Service Management<br>Wang, DeBin; Anhui Medical University, School of Health Services Management |
| Keywords:                     | cost effectiveness, lung cancer, inpatient care, retrospective study, China                                                                                                                                                                                                                                                                                                                                                                                                                                                                                                          |
|                               |                                                                                                                                                                                                                                                                                                                                                                                                                                                                                                                                                                                      |

SCHOLARONE™  
Manuscripts

Only

# Pathways and cost-effectiveness of routine lung cancer inpatient care in rural Anhui, China: a retrospective cohort study protocol

XingRong Shen\*, MengJie Diao\*, Rui Feng, ManMan Lu, PanPan Zhang, Tao Jiang, Debin Wang<sup>#</sup>

**Corresponding author: Debing Wang.**

Post address: 81 Meishan Road, Hefei, Anhui, China. 230032.

Email: [dbwang@vip.sina.com](mailto:dbwang@vip.sina.com)

Telephone: (0086) 5116395

**XingRong Shen:**

School of Health Service Management, Anhui Medical University, Hefei, Anhui, China.

**MengJie Diao:**

School of Health Service Management, Anhui Medical University, Hefei, Anhui, China.

**Rui Feng:**

Department of Literature Review and Analysis, Library of Anhui Medical University, Hefei, Anhui, China.

**ManMan Lu:**

School of Health Service Management, Anhui Medical University, Hefei, Anhui, China.

**PanPan Zhang:**

School of Health Service Management, Anhui Medical University, Hefei, Anhui, China.

**Tao Jiang:**

School of Health Service Management, Anhui Medical University, Hefei, Anhui, China.

**Word count: 2791**

## ABSTRACT

**Introduction:** Routine inpatient care (RIC) for cancer patients forms various pathways of clinical procedures. Although most of the individual procedures comprising the pathways have been tested via clinical trials, little is known about the collective cost-effectiveness of the pathways as a whole. This study aims at identifying pathways of RIC procedures for lung cancer patients from rural Anhui, China and examining determinants of the pathways and their links to cost-effectiveness.

**Methods and analysis:** The study adopts a retrospective cohort study design and proceeds in 5 steps. Step 1 defines 4 main categories of study variables including clinical procedures, direct cost and effectiveness of procedures, and factors affecting use of these procedures and their cost and effectiveness. Step 2 selects a cohort of 5000 lung cancer patients diagnosed between July 1, 2014 and June 30, 2015 from rural Anhui by clustered-random sampling. Step 3 retrieves the records of all the inpatient care episodes due to the lung cancer and extracts data about RIC procedures, proximate patient outcomes (e.g., Karnofsky performance status, lung function score) and related factors (e.g., stage of cancer, age, gender) by 2 independent clinician researchers using a pre-developed worksheet. Step 4 estimates the direct cost of each of the RIC procedures using micro-costing and collects data about ultimate patient outcomes (survival and progression-free survival) through a follow up survey of patients and/or their close relatives. Step 5 analyzes data collected and explores pathways of RIC procedures and their relations with patient outcomes, costs, cost-effect ratios and a whole range of clinical and socio-demographic factors using multivariate regression and path models.

**Ethics and dissemination:** The study protocol has been approved by authorized ethics committee. Findings from the study will be disseminated through conventional academic routes such as peer-reviewed publications and presentations and regional, national and international conferences.

### Trial registry

ISRCTN25595562

**Key words:** cost effectiveness, lung cancer, inpatient care, retrospective study, China

## Strengths and limitations of this study

- The study adopts a retrospective cohort study design involving a large representative sample of community patients;
- It evaluates cost-effectiveness of pathways of clinical procedures as a whole rather than individual procedures;
- It examines pathways of routine inpatient care for a huge but understudied Chinese rural population;
- It extracts data from routine records kept at different hospitals and thus suffers from discrepancies in performances and data qualities.

## Introduction

Lung cancer has been the most common cancer in the world for several decades.<sup>1</sup> Estimated new cases of the disease was 1.8 million in 2012 (12.9% of the total), 58% of which occurred in less developed regions. Lung cancer was also the most common cause of death from cancer worldwide, being responsible for nearly one in five (1.59 million in absolute number) of the total.<sup>2</sup> In China, lung cancer incidence shows a slight decreasing trend in the past few years, particularly for males. However, it is still the top first cancer for males and second for females, accounting for 25.2% of all new cancer cases and 29.5% of all cancer deaths in 2012.<sup>3</sup>

Routine inpatient care (RIC) for lung cancer consists of a combination of procedures. Patients with possible lung cancer need a detailed history and physical examination first. Then they should undergo posterior-anterior and lateral chest radiographs as well as CT scans of the chest and abdomen. In order to further confirm and determine stage and histology of the lesion, other diagnostic methods needed include whole-body fluoro-deoxy-glucose positron emission tomography, endoscopic ultrasound, sputum cytology, fine-needle aspiration, bronchoscopy and others. Following diagnosis of lung cancer, the patients proceed with combined-modality therapies depending on stage of the disease and co-morbidity and complications. Historically, surgery provides the best chance for cure for patients whose lung cancers are limited to the hemithorax and can be totally encompassed by excision.<sup>4 5</sup> And surgery has been generally used in combination with external-beam radiotherapy for control of the primary tumor and regional lymphatics.<sup>6</sup> In addition, chemotherapy has also been advocated as an integral part of combined modality approaches to earlier stages of disease.<sup>7 8</sup> For unselected advanced none-small cell lung cancer, platinum-based combinations have become the standard of care; while cisplatin- or carboplatin-based doublets are standard for patients with stage IV disease.<sup>9 10</sup> More recently, EGFR tyrosine kinase inhibitors have been introduced in second- and third-line treatment of advanced disease and in first-line treatment for selected patients.<sup>11</sup>

Given the complex procedures, ensuring quality RIC for lung cancer patients has been most challenging and guidelines are widely used in addressing this challenge. Numerous

1  
2  
3 studies have documented positive relations between compliance with guidelines and  
4 patients outcomes.<sup>12 13</sup> However, researchers also have raised concerns about guidelines.  
5 One of such concerns refers to lack of adequate consideration of costs. Most clinical  
6 procedures not only affect disease outcomes but also incur considerable costs.<sup>14 15</sup> Yet  
7 guidelines are based on trials focused primarily on effectiveness (e.g., survival) with little  
8 attention being paid to economic consequences.<sup>16</sup> Another concern relates to  
9 incompatible population between clinical trials and RIC. Clinical trials on which  
10 guidelines are based use highly selected populations; while RIC serves a general lung  
11 cancer population with different age, performance status and comorbidities.<sup>17 18</sup> A third  
12 concern revolves uncertain interactions between procedures. Although most individual  
13 guideline recommended procedures (GRPs) have established evidences, they are not used  
14 in isolation but in conjunction with others forming various clinical pathways. Efforts  
15 systematically assessing and comparing these pathways are scarce.<sup>19-22</sup> A fourth concern  
16 originates from varied compliance with guidelines since RIC often deviates substantially  
17 from guidelines.<sup>23 24</sup> The cost-effectiveness of these “substandard” pathways or mixed  
18 combinations of procedures (partly from guidelines, partly from experiences of  
19 individual clinicians) falls far from well-understood.<sup>25</sup> These all points to a conclusion  
20 that guidelines may not necessarily secure expected outcomes and there is a clear need  
21 for monitoring RIC.  
22  
23  
24  
25  
26  
27

28  
29 All the above mentioned concerns surrounding cancer care are most pertinent to China.  
30 First, China has a unique “dual” medical care system in which patients often receive  
31 western medical medicine and traditional Chinese medicine simultaneously or in turn.<sup>26</sup>  
32 Second, China lacks coordinated referral and follow up mechanisms and cancer patients  
33 often moves freely from one hospital to another for different rounds of inpatient care.<sup>27</sup>  
34 This makes it hard for clinicians in leveraging different inpatient care episodes at  
35 different time points and hospitals into continuous and synergetic service. Third, China  
36 has strong socio-cultural norms and financial incentives that hinder cost control and  
37 guideline compliance.<sup>28</sup>  
38  
39  
40

## 41 **Study aims**

42  
43 This study aims at identifying pathways of RIC procedures for lung cancer patients from  
44 rural Anhui, China and examining determinants of the pathways and their links to cost-  
45 effectiveness.  
46  
47

## 48 **Methodology**

### 49 **Guiding framework**

50  
51 The study uses a retrospective cohort design. Content of the study is defined using a  
52 practical framework as depicted by Figure 1. The framework holds that: a) patient  
53 outcomes and costs jointly define the ultimate goal, cost-effectiveness, of RIC; b) clinical  
54 procedures affect final patient outcomes indirectly via modifying psycho-physio-  
55  
56  
57  
58  
59  
60

1  
2  
3 pathological factors of patient outcomes and incur costs simultaneously; c) decision-  
4 making determines selection of RIC procedures based on understanding and prediction of  
5 the status of all the other elements included in the framework. By excluding the two  
6 brown circles, Figure 1 becomes an outcome-oriented framework that represents typical  
7 current RIC for cancer patients. Given that all clinical procedures inevitably incur more  
8 or less cost which in turn directly or/and indirectly affects selection and implementation  
9 of clinical procedures, cost-effectiveness oriented approaches are more relevant than  
10 outcomes-focused ones.<sup>29</sup>

### 14 **Identification of procedures**

15 The study uses a self-designed data extraction form in identifying major clinical  
16 procedures described in any RIC record under concern. The form lists all major RIC  
17 procedures under two main domains, i.e., diagnostic procedures (e.g., chest X-ray, chest  
18 CT, neck ultrasonography; Part D of supplementary file 1) and treatment procedures (e.g.,  
19 surgical therapy, chemotherapy, psycho-behavioral intervention; Part E of supplementary  
20 file 1).

### 24 **Estimation of costs**

25 The study estimates overall and categorical costs (direct costs only) for each of the RIC  
26 procedures (e.g., lung function examination, computed tomography, white blood cell  
27 count) identified above using micro-costing techniques.<sup>30</sup> Taking the example of lung  
28 function examination, categorical costs include costs on personnel, equipment, materials,  
29 regents and others need in completing the examination; while overall cost of the  
30 procedure equals the sum of all these categorical costs. In addition, the study also  
31 calculates overall cost on individual inpatient by adding up the overall costs on all the  
32 clinical procedures he/she has received.

### 37 **Measurement of effectiveness**

38 The study uses both proximate outcome (PO) and ultimate outcome (UO) measures of  
39 effectiveness of RIC procedures. The UO indicators derive from a follow up survey  
40 about 2 years and half after the first hospitalization and include survival and progression-  
41 free survival (PFS). The PO measures come from RIC records and include Eastern  
42 Cooperative Oncology Group (ECOG), Karnofsky performance status (KPS) and  
43 compiled scores of: a) symptoms (e.g., chronic cough, chest pain, wasting syndrome); b)  
44 lung functions (e.g., forced vital capacity, forced one second expiratory volume), c)  
45 image findings (e.g., number of nodules identified in the lung, size of the largest nodules,  
46 presence of pleura or pericardial effusion); d) biological test findings (e.g., value of CEA,  
47 CA125, proGRP); and e) complications and comorbidities (e.g., presence of superior  
48 vena cava syndrome, superior vena cava syndrome). Each of these domain specific PO  
49 scores equals weighted sum of all sub-indicators within the domain. For example, the  
50 compiled score of “lung functions” equals the sum of weighted values of forced vital  
51 capacity, forced one second expiratory volume etc. Here the weights come from the  
52  
53  
54  
55  
56  
57  
58  
59

1  
2  
3 coefficients of multivariate regression modeling using an UO indicator (e.g., survival) as  
4 the dependent variable; while forced vital capacity, forced one second expiratory volume  
5 etc. as the independent variables; and stage of disease, age, gender and others as the  
6 confounding variables.  
7

### 8 9 **Calculation of cost-effectiveness**

10 The study adopts cost-effectiveness ratios (CERs) and incremental cost-effectiveness  
11 ratio (ICERs) as the main indicator for measuring cost-effectiveness. Here ICER is  
12 defined by the difference in cost between two possible set of RIC procedures, divided by  
13 the difference in their effect. More specifically,  $ICER = (C_1 - C_0)/(E_1 - E_0)$ , where  
14  $C_1$  and  $E_1$  is the cost and effect in the study group and  $C_0$  and  $E_0$ , the cost and effect in the  
15 reference group.<sup>31</sup> ICER represents the average incremental cost associated with 1  
16 additional unit of the measure of effect. It serves a useful rule in resource allocation or  
17 clinical decision-making.<sup>32</sup>  
18  
19  
20  
21

### 22 **Identification of influencing factors**

23 The study also extracts, from RIC records, data about patient factors commonly believed  
24 to be linked with disease progression, treatment response and outcomes and utilization of  
25 RIC procedures. These include socio-demographics (e.g., age, gender, body height and  
26 weight, education, employment, marital status, medical insurance), risk behaviors and  
27 histories (e.g., smoking, alcohol drinking, history of cancer among family members), and  
28 clinical characteristics (e.g., stage of disease, historical findings, biomarkers).  
29  
30  
31

### 32 **Selection of participants**

33 The study is implemented in Anhui, an inland province located in middle and east China.  
34 It has a population of 61.4 million and its per capita GDP and income rank in the middle  
35 (14th) among all provinces in the nation.<sup>33 34</sup> The social, cultural and economic  
36 background of Anhui is representative of over 80% of the whole population in China.<sup>33 34</sup>  
37 The province has 68 rural counties and each of them divides into 10 to 20 townships.  
38 Selection of participating counties, townships, patients and RIC case records uses a  
39 clustered random sampling which proceeds in 5 steps. Step 1 classifies all the counties in  
40 Anhui into southern, northern and middle areas. Step 2 randomly selects 3 counties from  
41 each of these areas (12 counties in total). Step 3 randomly draws 4 townships from each  
42 of the counties selected (48 townships in total). Step 4 searches the provincial  
43 reimbursement database of the New Rural Medical System (NRMS) and identifies all the  
44 patients within the selected townships who had been first diagnosed with primary lung  
45 cancer during July 1, 2014 and June 30, 2015. Step 5 searches the database again for all  
46 episodes of hospitalization due to the lung cancer for the patients identified in step 4.  
47 NRMS covers 98% of the rural residents and the estimated number of patients and  
48 admission episodes is about 5,000 and 25,000 respectively.  
49  
50  
51  
52  
53  
54  
55  
56  
57  
58  
59  
60



## Data collection

The study obtains data through follow-up survey and data extraction. The follow-up survey applies to all the lung cancer patients identified above. It solicits information about the patient's: a) disease progression (i.e., died, alive with or without progression); b) if died, date of death; c) additional admissions due to the lung cancer not included in the above mentioned NRMS database. The survey uses a short structured questionnaire (supplementary file 2). Administration of the questionnaire starts with a telephone interview (of the patient under concern or his/her close relatives for up to 5 time attempts) followed by a face-to-face interview (of the same respondents for up to 2 attempts) if the telephone contacts failed. The data extraction applies to records of all the hospital admission episodes identified via the NRMS database and the follow up survey. It uses a structured form (supplementary file 1) and extracts data about the clinical procedures, costs, effectiveness and influencing factors described above. Two experienced clinicians on care of lung cancer perform the data extraction. They visit (on one-by-one base) all the relevant hospitals, ask for permission to examine the full records and fill the worksheet independently first followed by discussions, if applicable, to solve discrepancies.

## Data analysis

The data collected above allow a variety of descriptive and multivariate analysis. In particular, the data analysis centers on effectiveness, costs and pathway-based cost-effectiveness of RIC. Effectiveness analysis comprises mainly: a) description of UO indicators (e.g., survival rate) at different time points after first diagnosis by disease stage, age range etc. (Figure 2); b) multivariate regression models using UO indicators as dependent and socio-demographics, disease stage, selected RIC procedures and others as independent variables; c) path models using similar independent variables in b as exogenous, PO indices as direct endogenous, and UP indicators as indirect endogenous variables.

Similarly, cost analysis includes mainly: a) description of overall and categorical costs on different rounds of hospitalization by socio-demographic and selected clinical conditions (Figure 3); b) scatter plot of RIC procedures using the occurrence rate and unit cost of individual procedures as the coordinates; and c) multivariate models of overall and selected categorical costs.

Pathway-based cost-effectiveness analysis focuses primarily on constructing a pathway tree showing different combinations of RIC procedures starting from the first to the last episode of inpatient care and estimated cost-effectiveness ratios (CERs/ICERs) for each branches of the tree (Figure 4). It also performs multivariate regression analysis exploring potential factors affecting the flow of RIC among different branches.

### **Ethics and dissemination**

The study involves retrieving RIC records and recruiting patients or their relatives. So it adheres to rigorous human subject protection principles. The study protocol had been reviewed and approved by the Biomedical Ethics Committee of Anhui Medical University (reference number: 20170312). Participation of hospitals, patients and their relatives are voluntary and written informed consent is sought from all participants. Findings from the study will be disseminated through conventional academic routes such as peer-reviewed publications and presentations and regional, national and international conferences.

### **Discussion**

This study addresses RIC for lung cancer at hospitals in China from a range of meaningful perspectives. The study reinforces the concepts introduced in the landmark studies of Fisher et al and Wennberg et al, which convincingly demonstrated that high quality was not necessarily associated with high cost.<sup>35</sup> Describing inpatient lung cancer care in a view that its value is directly proportional to outcomes and inversely proportional to costs helps in guiding quality improvement by either better outcomes and/or lower costs.<sup>36</sup> The study calculates and compares the collective cost-effectiveness of different RIC pathways as a whole and thus informs coordinated inpatient care episodes and procedures at different time points and hospitals. The study enables ICERs estimation for specific guideline recommended procedures (GRPs) using various combinations of real and uncontrollable RIC procedures as the reference and thus enhances understanding and application of GRPs established through well-controlled studies in routine practice contexts.

Perhaps the most noteworthy findings of the current study may be the description of the pathways of RIC procedures and their links with cost-effectiveness (Figure 4). These pathways will provide easily understandable means for estimating and identifying, among others, the following: a) which pathways or combinations of procedures happen most or least in routine practice during different rounds of hospitalization for inpatients suffering from lung cancer in rural China; b) which pathways (from the first to last round of hospitalization) incur the highest or lowest direct costs; c) which pathways result in the best or worst patient outcome in terms of different PO and UO measures; d) which pathways are most or least cost-effective in terms of e.g., per unit cost gains in PFS, KPS, symptoms, lung functions, image findings, biological test findings, complications and comorbidities. These have important implications for clinical decision-making as well as policy-making.

Another point worth mentioning in particular refers to the links between the domain specific proximate outcome (PO) indices to key ultimate outcome (UO) indicators (e.g., survival) generated via a large scale (involving 5000 lung cancer patients) retrospective

1  
2  
3 cohort study. They provide useful references for clinicians on care of lung cancer patients  
4 in selecting appropriate procedures to achieve optimal collective contributions to UO.<sup>37</sup>  
5 At present, although PO indicators are routinely observed, they are presented to  
6 clinicians as individual indicators rather than compiled indices. And given the large  
7 number of PO indicators involved and the complex relations between RIC procedures  
8 and PO indicators and then UO indicators, it is difficult for practicing clinicians to make  
9 balanced decisions upon their personal experiences.<sup>38</sup>  
10  
11

12  
13 The study also has limitations. First, different hospitals use different equipment, reagents  
14 and medicines. Their quality of case records may also vary substantially. These raise  
15 compatibility concerns in pooling data from different hospitals together and performing  
16 aggregate analysis. Second, the study considers only inpatient care; while patients may  
17 use various self-treatment and outpatient treatment in addition to inpatient care.<sup>39 40</sup> And  
18 inpatient and non-inpatient treatment may substitute each other to some extent. These  
19 may result in under-estimation of the effectiveness of RIC procedures. Third, more severe  
20 or complicated cases of lung cancer patients may be more likely to use inpatient care.  
21 This may again lead to false reduced efficacy of inpatient care. Fourth, study uses only  
22 direct costs rather than full costs taking both direct and indirect costs into consideration.  
23  
24  
25  
26

## 27 **Competing interests**

28  
29  
30 The authors declare no competing interests.  
31

## 32 **Authors' contributions**

33  
34  
35 XS and MD contributed equally in conceiving this project, facilitating protocol and  
36 instrument development, and drafting this manuscript. RF, ML, PZ and TJ are core  
37 researchers for cost estimation, record extraction, follow up survey and data analysis  
38 respectively. DW provided expertise for overall design of the study, and revised and  
39 finalized the manuscript. All authors have read and approved the final submission.  
40  
41  
42

## 43 **Acknowledgements**

44  
45 Development of the primitive protocol was supported by the Natural Science Foundation  
46 of China (grant number: 81172201). Refinement and implementation of the protocol is  
47 lead and supported by Collaboration Center for Cancer Control of Anhui Medical  
48 University, Anhui and Luan Center for Diseases Control and Prevention.  
49  
50  
51

## 52 **References**

- 53  
54  
55 1. McErlean A, Ginsberg MS. Epidemiology of lung cancer. *Semin Roentgenol* 2011;46  
56 (3):173-7.  
57  
58  
59

2. World Health Organization. GLOBOCAN 2012: Estimated Cancer Incidence, Mortality and Prevalence Worldwide in 2012. <http://globocan.iarc.fr/Default.aspx>.
3. Kong J, Xu F, He M, Chen K, et al. The incidence of lung cancer by histological type: a population-based study in Tianjin, China during 1981-2005. *Respirology* 2014;19(8):1222-8.
4. Woodard GA, Jablons DM. The Latest in Surgical Management of Stage IIIA Non-Small Cell Lung Cancer: Video-Assisted Thoracic Surgery and Tumor Molecular Profiling. *Am Soc Clin Oncol Educ Book* 2015;35:e435-41.
5. Grunewald DH. The role of surgery in non-small-cell lung cancers. *Ann Oncol* 2005;16 Suppl 2:ii220-2.
6. Ricardi U, Badellino S, Filippi AR. Stereotactic radiotherapy for early stage non-small cell lung cancer. *Radiat Oncol J.* 2015;33(2):57-65.
7. Mangal S, Gao W, Li T1, Zhou QT. Pulmonary delivery of nanoparticle chemotherapy for the treatment of lung cancers: challenges and opportunities. *Acta Pharmacol Sin.* 2017. doi: 10.1038/aps.2017.34.
8. Khan I, Morris S, Hackshaw A, et al. Cost-effectiveness of first-line erlotinib in patients with advanced non-small-cell lung cancer unsuitable for chemotherapy. *BMJ Open* 2015; 5(7):e006733.
9. Garon EB, Ciuleanu TE, Arrieta O, et al. Ramucirumab plus docetaxel versus placebo plus docetaxel for second-line treatment of stage IV non-small-cell lung cancer after disease progression on platinum-based therapy (REVEL): a multicentre, double-blind, randomised phase 3 trial. *Lancet* 2014;384(9944):665-73.
10. Spigel DR, Luft A, Depenbrock H, et al. An Open-Label, Randomized, Controlled Phase II Study of Paclitaxel-Carboplatin Chemotherapy With Necitumumab Versus Paclitaxel-Carboplatin Alone in First-Line Treatment of Patients With Stage IV Squamous Non-Small-Cell Lung Cancer. *Clin Lung Cancer* 2017; pii: S1525-7304(17)30045-1.
11. Stinchcombe TE. The Use of EGFR Tyrosine Kinase Inhibitors in EGFR Wild-Type Non-Small-Cell Lung Cancer. *Curr Treat Options Oncol* 2016; 17(4):18.
12. Ahmed HZ, Liu Y, O'Connell K, et al. Guideline-concordant Care Improves Overall Survival for Locally Advanced Non-Small-cell Lung Carcinoma Patients: A National Cancer Database Analysis. *Clin Lung Cancer* 2017; pii: S1525-7304(17)30114-6.
13. Nadpara P, Madhavan SS, Tworek C. Guideline-concordant timely lung cancer care and prognosis among elderly patients in the United States: A population-based study. *Cancer Epidemiol*; 39(6):1136-44.
14. Hinde S, McKenna C, Whyte S, et al. Modelling the cost-effectiveness of public awareness campaigns for the early detection of non-small-cell lung cancer. *Br J Cancer* 2015; 113(1):135-41.
15. Kumar G, Woods B, Hess LM, et al. Cost-effectiveness of first-line induction and maintenance treatment sequences in non-squamous non-small cell lung cancer (NSCLC) in the U.S. *Lung Cancer* 2015. pii: S0169-5002(15)00281-0.
16. Warren JL, Harlan LC, Trimble EL, et al. Trends in the receipt of guideline care and survival for women with ovarian cancer: A population-based study. *Gynecol Oncol* 2017;145(3):486-492.
17. Jennens RR, Giles GG, Fox RM. Increasing underrepresentation of elderly patients with advanced colorectal or non-small-cell lung cancer in chemotherapy trials. *Int Med J* 2006;36: 216e220.

18. Murthy VH, Krumholtz HM, Gross CP. Participation in cancer clinical trials; race-, sex-, and age-based disparities. *JAMA* 2004;22(291): 2720-2726.
19. Tong Y, Huang C, Zhang J. A novel EGFR-TKI inhibitor (cAMP-H3BO3 complex) combined with thermal therapy is a promising strategy to improve lung cancer treatment outcomes. *Oncotarget*. Published Online First: 04 May 2017.doi: 10.18632/oncotarget.17628.
20. National Health and Family Planning Commission of China. Guideline for Chinese primary lung cancer diagnosis and treatment (2015 edition). *Chinese Journal of Oncology* 2015;37(1):67-78.
21. Xing Wang, Shi Yan, Yaqi Wang, et al. Surgical Quality Surveillance and Sustaining Improvement of Lung Cancer Surgery Based On Standard Operation Procedure(SOP) : Experience of Single Surgical Team. *Chinese Journal of Lung Cancer*; 20(4): 253-258.
22. Jackman DM, Zhang Y, Dalby C, et al. Cost and Survival Analysis Before and After Implementation of Dana-Farber Clinical Pathways for Patients With Stage IV Non-Small-Cell Lung Cancer. *J Oncol Pract* 2017;13(4):e346-e352.
23. Okita A, Yamashita M, Abe K, et al. Variance analysis of a clinical pathway of video-assisted single lobectomy for lung cancer. *Surg Today* 2009;39(2):104-9.
24. Duggan KJ, Descallar J, Vinod SK. Application of Guideline Recommended Treatment in Routine Clinical Practice: A Population-based Study of Stage I-III Non-small Cell Lung Cancer. *Clin Oncol (R Coll Radiol)* 2016;28(10):639-47.
25. Heins MJ, de Jong JD, Spronk I, et al. Adherence to cancer treatment guidelines: influence of general and cancer-specific guideline characteristics. *Eur J Public Health* 2016; pii: ckw234. doi: 10.1093/eurpub/ckw234.
26. Yang S, Cui M, Li HY, et al. Meta-analysis of the effectiveness of Chinese and Western integrative medicine on medium and advanced lung cancer. *Chin J Integr Med* 2012;18(11):862-7.
27. XX L, YW Chen, KS Bi. Resolution of Two- way Recerral Problem in China by Studying British National Health Service System. *Chinese General Practice* 2013; 31(16):2926-29.
28. Y Sun, J Wu, SB Xie, et al. Evaluation of the medical staff clinical pathway adherence: Based on comparison of before and after provider payment reform in Henan Province. *Chinese Journal of Health Policy* 2013;6(5):37-43.
29. Kern H, Kox WJ. Impact of standard procedures and clinical standards on cost-effectiveness and intensive care unit performance in adult patients after cardiac surgery. *Intensive care medicine*. 25(12):1367-1373.
30. Henry SG, Ness RM, Stiles RA, Shintani AK, Dittus RS. A cost analysis of colonoscopy using microcosting and time-and-motion techniques. *J Gen Intern Med* 2007, 22(10):1415-21.
31. SN York. Incremental Cost-Effectiveness Ratio. *Handbook of Disease Burdens and Quality of Life Measures* 2010: 4235-4235.
32. Wong CK, Lang BH, Guo VY, et al. Possible Impact of Incremental Cost-Effectiveness Ratio (ICER) on Decision Making for Cancer Screening in Hong Kong: A Systematic Review. *Appl Health Econ Health Policy* 2016;14(6):647-657.
33. National Bureau of Statistics of China. China Statistical Yearbook 2016. <http://www.stats.gov.cn/tjsj/ndsj/2016/indexch.htm> (accessed 1 July 2017).
34. Statistics Bureau of Anhui Province. Statistical yearbook of Anhui Province in 2016.

1  
2  
3 [http://www.ahtjj.gov.cn/tjj/web/tjnj\\_view.jsp?strColId=13787135717978521&index=1#](http://www.ahtjj.gov.cn/tjj/web/tjnj_view.jsp?strColId=13787135717978521&index=1#) (accessed 1 July 2017).

- 4  
5 35. Wennberg JE, Fisher ES. Finding high quality, efficient providers for value  
6 purchasing: cohort methods better than methods based on events. Finding high  
7 quality, efficient providers for value purchasing: cohort methods better than methods  
8 based on events. *Med Care* 2002;40(10):853-5.  
9  
10 36. Chen LW, Wilson FA, Gregg A, et al. Measuring the Cost and Value of Quality  
11 Improvement Initiatives for Local Health Departments. *J Public Health Manag Pract*.  
12 Published Online First: 1 Mar 2017. doi: 10.1097/PHH.0000000000000552.  
13  
14 37. Darling G, Malthaner R, Dickie J, et al. Quality indicators for non-small cell lung  
15 cancer operations with use of a modified Delphi consensus process. *Ann Thorac Surg*  
16 2014;98(1):183-90.  
17  
18 38. Fisher A, Manicavasagar V, Sharpe L, et al. A Qualitative Exploration of Clinician  
19 Views and Experiences of Treatment Decision-Making in Bipolar II Disorder.  
20 *Community Ment Health J*. Published Online First: 19 Jan 2017. doi:  
21 10.1007/s10597-016-0077-4.  
22  
23 39. O' Regan P, Hegarty J. The importance of self-care for fatigue amongst patients  
24 undergoing chemotherapy for primary cancer. *Eur J Oncol Nurs* 2017;28:47-55.  
25  
26 40. Dionne-Odom JN, Demark-Wahnefried W, Taylor RA, et al. The self-care practices  
27 of family caregivers of persons with poor prognosis cancer: differences by varying  
28 levels of caregiver well-being and preparedness. *Support Care Cancer* 2017;  
29 25(8):2437-2444.  
30  
31  
32  
33  
34  
35  
36  
37  
38  
39  
40  
41  
42  
43  
44  
45  
46  
47  
48  
49  
50  
51  
52  
53  
54  
55  
56  
57  
58  
59  
60

1  
2  
3 Figure 1 Guiding framework for cost-effectiveness evaluation  
4

5 Figure 2 Simulated survival after first diagnosis of lung cancer  
6

7 Figure 3 Simulated cost by selected socio-demographics and clinical characteristics  
8 (TC=total cost; KRMB=1000 Chinese yuan)  
9

10 Figure 4 Anticipated “procedure-outcome” tree of inpatient lung cancer care (Tx = the  
11 xth round of hospitalization; Cx = the xth combination of clinical procedures; Px =  
12 possibility of using the xth combinations of clinical procedures; Ox = the xth patient  
13 outcome index/indicator)  
14  
15  
16  
17  
18  
19  
20  
21  
22  
23  
24  
25  
26  
27  
28  
29  
30  
31  
32  
33  
34  
35  
36  
37  
38  
39  
40  
41  
42  
43  
44  
45  
46  
47  
48  
49  
50  
51  
52  
53  
54  
55  
56  
57  
58  
59  
60

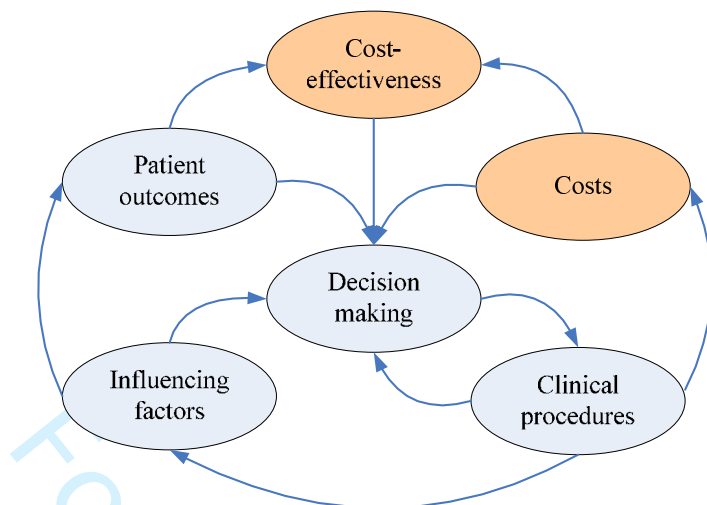

Figure 1 Guiding framework for cost-effectiveness evaluation



1  
2  
3  
4  
5  
6  
7  
8  
9  
10  
11  
12  
13  
14  
15  
16  
17  
18  
19  
20  
21  
22  
23  
24  
25  
26  
27  
28  
29  
30  
31  
32  
33  
34  
35  
36  
37  
38  
39  
40  
41  
42  
43  
44  
45  
46  
47

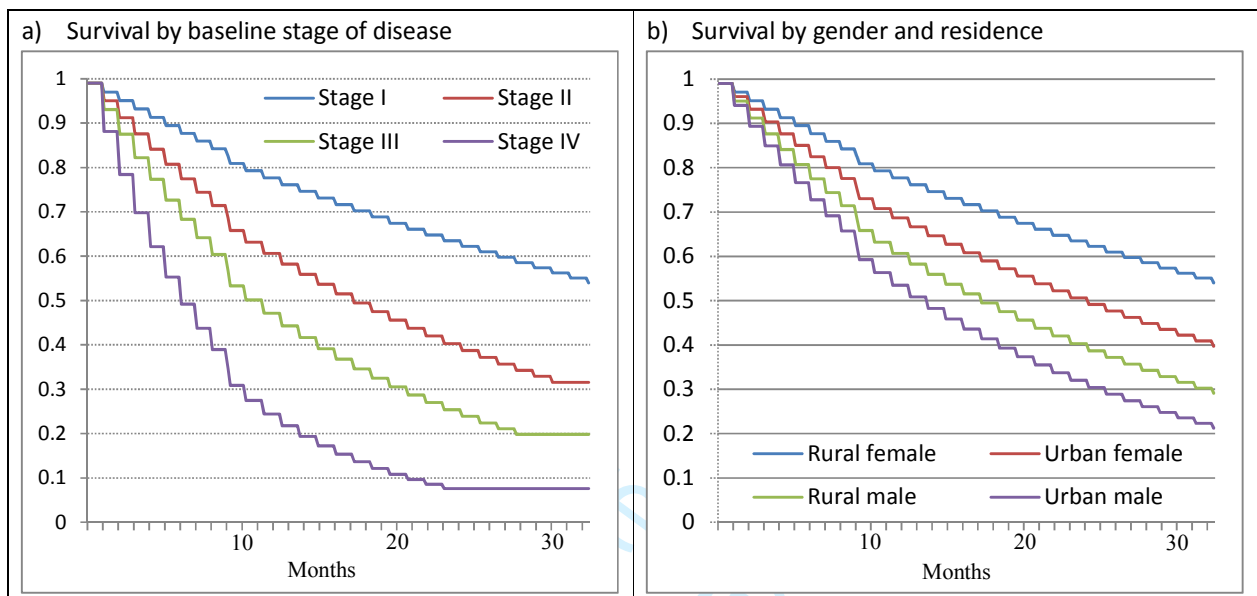

Figure 2 Simulated survival after first diagnosis of lung cancer

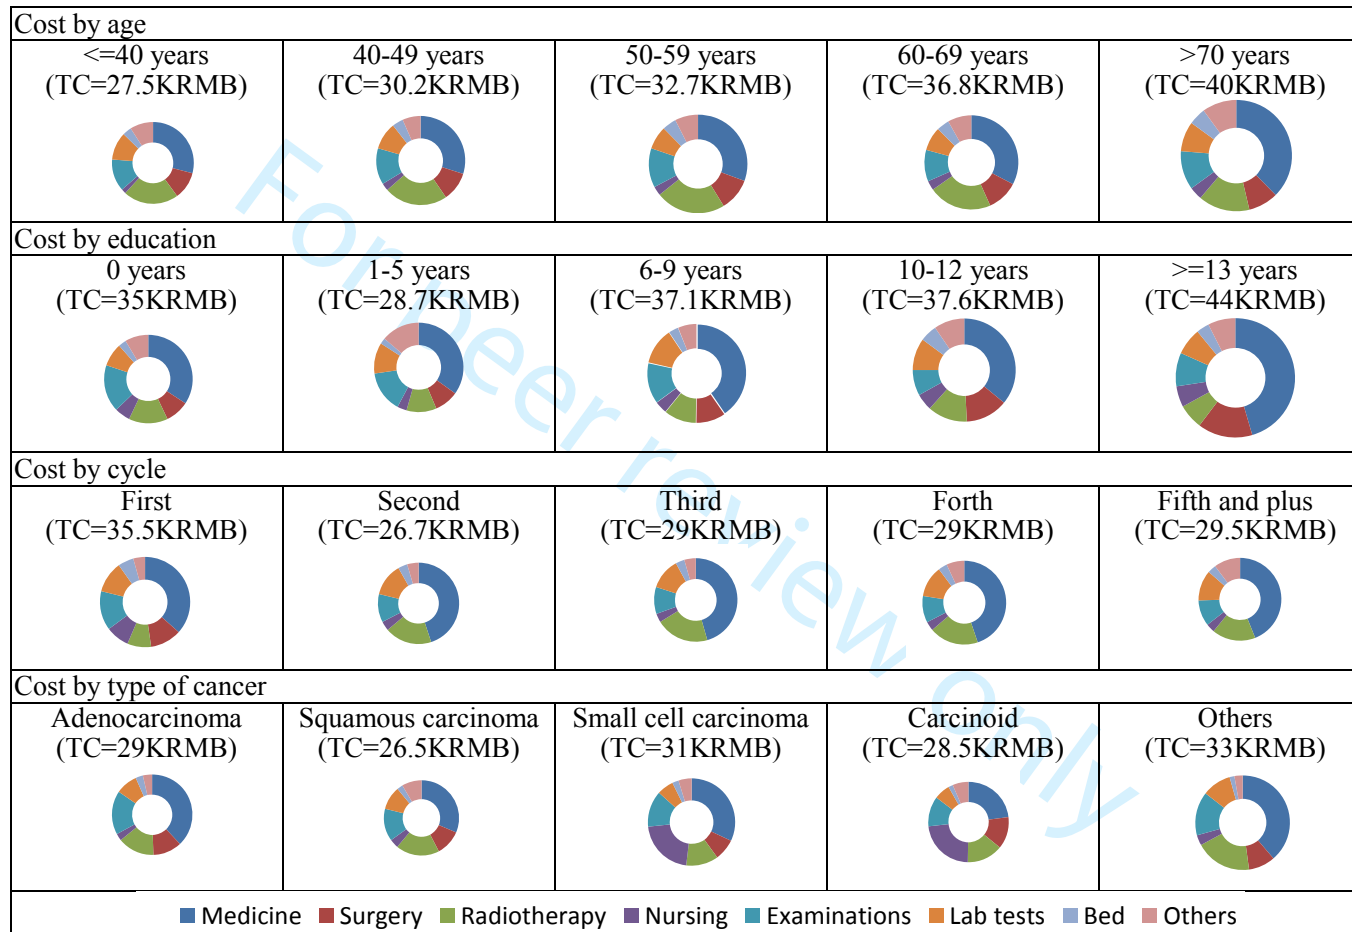

Figure 3 Simulated cost by selected socio-demographics and clinical characteristics (TC=total cost; KRMB=1000 Chinese yuan)

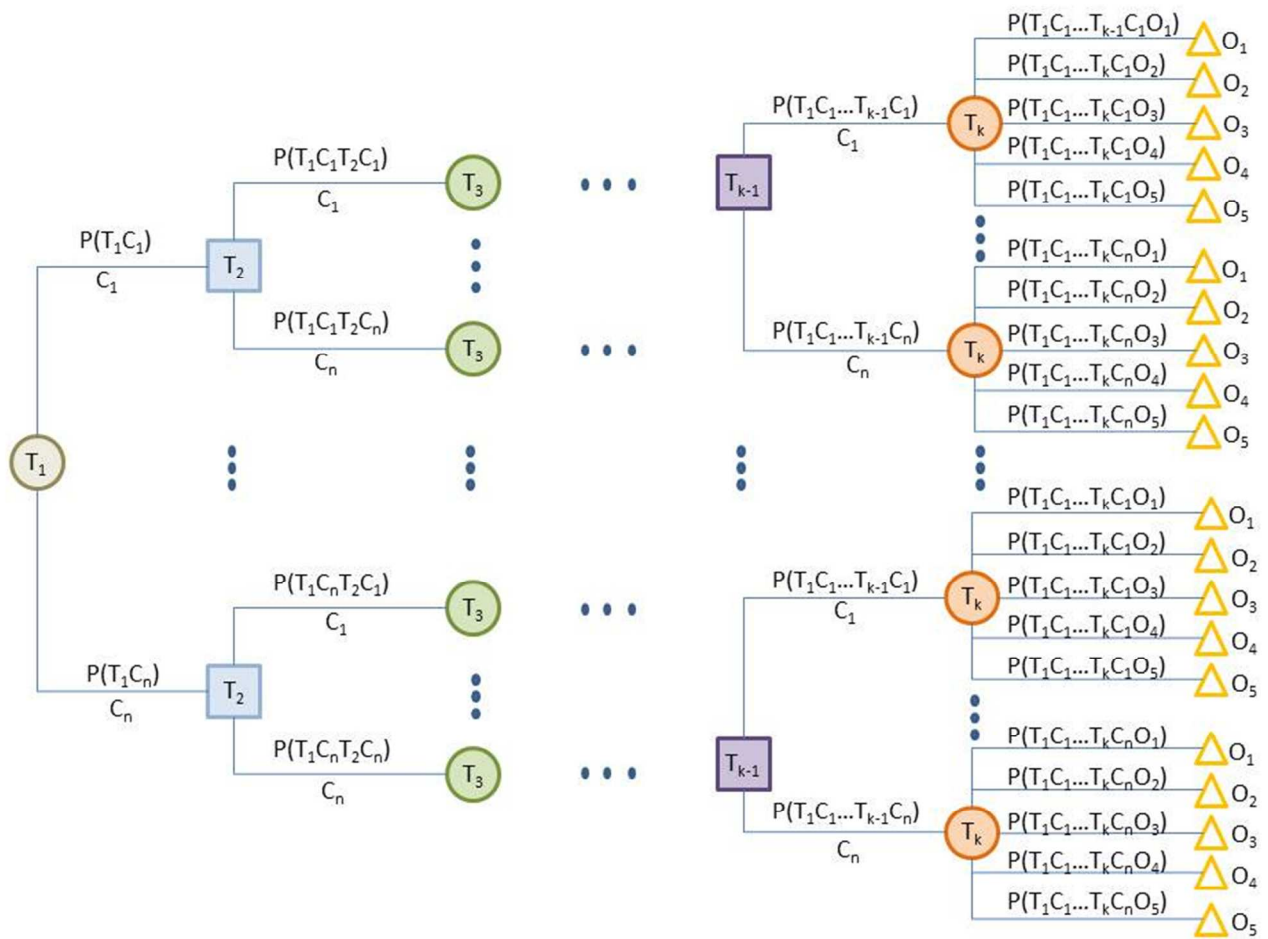

Figure 4 Anticipated “procedure-outcome” tree of inpatient lung cancer care ( $T_x$  = the  $x^{\text{th}}$  round of hospitalization;  $C_x$  = the  $x^{\text{th}}$  combination of clinical procedures;  $P_x$  = possibility of using the  $x^{\text{th}}$  combinations of clinical procedures;  $O_x$  = the  $x^{\text{th}}$  patient outcome index/indicator)

## Annex 1 Lung cancer inpatient care data extraction form

Reference Number: -

### Part A: Patient's social demographics

1.1 Case record number:

1.2 Patient identification number:

1.3 Sex: [1]Male [2]Female

1.4 Birth date (dd-mm-yyyy, first case record only): --

1.5 Body height (centimeter, first case record only):

1.6 Body weight (kilogram):

1.7 Education (first case record only):

- |                         |                    |                        |
|-------------------------|--------------------|------------------------|
| [1] No formal education | [2] Primary school | [3] Middle school      |
| [4] High school         | [5] College        | [6] Graduate or higher |
| [9] Not clear           |                    |                        |

1.8 Occupation (first case record only):

- |                              |                       |                   |
|------------------------------|-----------------------|-------------------|
| [1] Staff of public entities | [2] Employee of firms | [3] Self-employed |
| [4] Peasant                  | [5] Un-employed       | [6] Retired       |
| [7] Army member              | [9] Not clear         |                   |

1.9 Marital status:

- |               |             |               |
|---------------|-------------|---------------|
| [1] Unmarried | [2] Married | [3] Divorced  |
| [4] Widowed   | [5] Other   | [9] Not clear |

1.10 Medical insurance:

- [1] Essential medical insurance for urban employees
- [2] Medical insurance for urban citizens
- [3] New rural cooperative medical care systems
- [4] Commercial medical insurance
- [5] Public medical care system
- [6] Out-of-pocket care
- [7] Other
- [9] Not clear

### Part B: Patient's behavior and disease history (first case record only)

2.1 Smoking:

- |                             |                   |                |
|-----------------------------|-------------------|----------------|
| [1] Current smoker          | [2] Former smoker | [3] Non-smoker |
| [9] Not clear (skip to 2.2) |                   |                |

2.1.1 Number of cigarettes smoked per day:

2.1.2 Number of years smoked:

2.1.3 Number of years ceased smoking:

## 2.2 Previous diagnosis of the following respiratory diseases:

- [1] Tuberculosis                      [2] Chronic bronchitis                      [3] Emphysema  
 [4] Asthma                              [5] Silicosis/pneumoconiosis  
 [6] Other(specify)

## 2.3 Previous diagnosis of the following cardio-cerebrovascular/endocrine diseases:

- [1] Hypertension                      [2] Coronary heart disease                      [3] Cerebral thrombosis  
 [4] Cerebral hemorrhage                      [5] Hyperlipemia                      [6] Diabetes  
 [7] Other(specify)

## 2.4 Previous diagnosis of cancer (enter location of cancer, if applicable, e.g., breast cancer, colorectal cancer)

- [1]                                              [2]                                              [3]  
 [4]                                              [5]                                              [6]  
 [7]                                              [8]                                              [9]

(Please add more cells as needed)

## 2.5 Previous diagnosis of cancer among relatives

| Number | Type of relatives | Location of cancer |
|--------|-------------------|--------------------|
| [1]    |                   |                    |
| [2]    |                   |                    |
| [3]    |                   |                    |

(Please add more rows as needed)

**Part C: Patient's current symptoms/signs**

## 3.1 Respiratory symptoms/signs

- [1] Chronic coughing                      [2] Sputum with blood                      [3] Chest suppression  
 [4] Chest pain                              [5] Difficult breathing                      [6] Repeated bronchitis  
 [7] Hoarseness                              [8] Other (specify)  
 [9] None

## 3.2 Symptoms/signs of metabolism or immunity dysfunction:

- [1] None                                      [2] Hippocratic fingers/toes                      [3] Amyasthenia  
 [4] Hyponatremia                              [5] Blacken skin folds  
 [6] Other (specify)

## 3.3 Symptoms/signs relating to lung cancer metastasis:

- [1] None                                      [2] Topical pain                              [3] Headache  
 [4] Dizzy                                      [5] Sudden dyskinesia                      [6] Facial swelling  
 [7] Other (specify)

## 3.4 Cancer-related non-specific symptoms/signs:

- [1] None                                      [2] Apparent emaciation                      [3] Weakness  
 [4] Mild/moderate fever                      [5] Other (specify)

## 3.5 Karnofsky score:

- [1]   
 [2] Not available

## 3.6 Body surface examination findings:

- [1] None

- 1  
2  
3 [2] Enlargement of lymph nodes in the neck or supraclavicular region  
4 [3] Lymph node enlargement in other areas  
5 [4] Subcutaneous nodule  
6 [5] Horner syndrome  
7 [6] Facial swelling  
8 [7] Other (specify)  
9 [9] Not clear  
10  
11  
12

## 13 Part D: Diagnostic procedures and findings

### 14 4 Imaging diagnosis

#### 15 4.1 Chest X-ray examination:

16 [1] Not performed (skip to 4.2)

17 [2] Performed

18 4.1.1 Date of performance (dd-mm-yyyy): |\_|\_|-|\_|\_|-|\_|\_|\_|\_|

19 4.1.2 Abnormalities identified

20 [1] None

21 [2] Pulmonary nodules/mass

22 [3] Hilar / mediastinal abnormalities

23 [4] Pleural effusion

24 [5] Pericardial effusion

25 [6] Other (specify)

26 4.1.2.1 If [2], please specify the largest nodules/mass: |\_|\_|.|\_|\*|\_|\_|.|\_|cm

#### 27 4.2 Chest CT examination:

28 [1] Not performed (skip to 4.3)

29 [2] Performed

30 4.2.1 Date of performance (dd-mm-yyyy): |\_|\_|-|\_|\_|-|\_|\_|\_|\_|

31 4.2.2 Type of CT performed

32 [1] Plain

33 [2] Enhanced scan

34 [3] Plain + enhanced

35 4.2.3 Layer thickness: |\_|\_|.|\_|cm

36 4.2.4 Multiple plane reconstruction (MPR):

37 [1] Yes [2] No

38 4.2.5 Locations scanned

39 [1] Chest

40 [2] Chest and abdomen

41 [3] Neck and chest

42 [4] Neck+chest+abdomen

43 4.2.6 Abnormalities identified

44 4.2.6.1 Diagnosis from chest CT

45 [1] No abnormalities

46 [2] Affirmative benign

47 [3] Suspected benign

48 [4] Suspected malignant [5] Affirmative malignant

49 [6] Others (specify)

50 [9] Not clear

51 4.2.6.2 Abnormalities identified

- 1  
2  
3 [1] Pneumonia [2] Bronchial abnormality [3] Single nodules/mass  
4 [4] Multiple nodules/mass [5] Pleural effusion [6] Pericardial effusion  
5 [7] Other (specify)  
6 4.2.6.2.1 If [3] or [4], size of the largest nodules/mass: |\_|\_|.|\_|\*|\_|\_|.|\_|cm  
7  
8 4.3 Head CT examination:  
9 [1] Not performed (skip to 4.4)  
10 [2] Performed  
11 4.3.1 Date of performance (dd-mm-yyyy): |\_|\_|-|\_|\_|-|\_|\_|\_|\_|  
12 4.3.2 Type of CT performed  
13 [1] Plain [2] Enhanced scan [3] Plain + enhanced  
14 4.3.3 Diagnosis from head CT  
15 [1] No abnormalities [2] Confirmed/suspected brain metastases  
16 [3] Others (specify)  
17  
18 4.4 Head MR examination  
19 [1] Not performed (skip to 4.5)  
20 [2] Performed  
21 4.4.1 Date of performance (dd-mm-yyyy): |\_|\_|-|\_|\_|-|\_|\_|\_|\_|  
22 4.4.2 Diagnosis from head MR  
23 [1] No abnormalities [2] Single brain metastases [3] Multiple brain metastases  
24 [4] Others (specify)  
25 4.4.2.1 If [2] or [3], size of the largest nodules/mass: |\_|\_|.|\_|\*|\_|\_|.|\_|cm  
26  
27 4.5 Chest MR examination  
28 [1] Not performed (skip to 4.6)  
29 [2] Performed  
30 4.5.1 Date of performance (dd-mm-yyyy): |\_|\_|-|\_|\_|-|\_|\_|\_|\_|  
31 4.5.2 Diagnosis from chest MR  
32 [1] No abnormalities [2] Hilar/mediastinal lymph nodes [3] Lung nodules/mass  
33 [4] Bone metastases [5] Thoracic/pericardial effusion  
34 [6] Others (specify)  
35 4.5.2.1 If [3], size of the largest nodules/mass: |\_|\_|.|\_|\*|\_|\_|.|\_|cm  
36 4.5.2.2 If [4], location metastases  
37  
38 4.6 Bone MR examination  
39 [1] Not performed (skip to 4.7)  
40 [2] Performed  
41 4.6.1 Date of performance (dd-mm-yyyy): |\_|\_|-|\_|\_|-|\_|\_|\_|\_|  
42 4.6.2 Diagnosis from bone MR  
43 [1] No abnormalities [2] Bone metastases  
44 [3] Others (specify)  
45 4.6.2.1 If [2], location of metastases  
46  
47 4.7 Neck ultrasonography  
48 [1] Not performed (skip to 4.8)  
49 [2] Performed  
50 4.7.1 Date of performance (dd-mm-yyyy): |\_|\_|-|\_|\_|-|\_|\_|\_|\_|  
51 4.7.2 Diagnosis from neck ultrasonography  
52  
53  
54  
55  
56  
57  
58  
59  
60

- [1] No abnormalities [2] Neck /supraclavicular lymph nodes  
[3] Others (specify)

#### 4.8 Chest ultrasonography

- [1] Not performed (skip to 4.9)  
[2] Performed

4.8.1 Date of performance (dd-mm-yyyy): |\_|\_|-|\_|\_|-|\_|\_|\_|\_|

##### 4.8.2 Diagnosis from chest ultrasonography

- [1] No abnormalities [2] Pleural effusion [3] Pericardial effusion  
[4] Others (specify)

#### 4.9 Abdominal ultrasonography

- [1] Not performed (skip to 4.10)  
[2] Performed

4.9.1 Date of performance (dd-mm-yyyy): |\_|\_|-|\_|\_|-|\_|\_|\_|\_|

##### 4.9.2 Diagnosis from abdominal ultrasonography

- [1] No abnormalities [2] Liver metastases [3] Adrenal gland transfer  
[4] Peritoneal/retroperitoneal lymphadenopathy  
[5] Others (specify)

#### 4.10 Bone scans

- [1] Not performed (skip to 4.11)  
[2] Performed

4.10.1 Date of performance (dd-mm-yyyy): |\_|\_|-|\_|\_|-|\_|\_|\_|\_|

##### 4.10.2 Diagnosis from bone scans

- [1] No abnormalities [2] confirmed metastases [3] Suspected metastases  
[4] Others (specify)

4.10.2.1 If [2] or [3], location of metastases

#### 4.11 PET-CT examination

- [1] Not performed (skip to 5.1)  
[2] Performed

4.11.1 Date of performance (dd-mm-yyyy): |\_|\_|-|\_|\_|-|\_|\_|\_|\_|

##### 4.11.2 Diagnosis from PET-CT examination

- [1] No abnormalities [2] Lung nodules/mass(Primary lesion)  
[3] Pulmonary metastasis [4] Lymph node metastasis  
[5] Adrenal gland transfer [6] Bone transfer  
[7] Other site transfer [8] Thoracic / pericardial effusion  
[9] Others (specify)

4.11.3.1 If [2], location of lung nodules/mass

4.11.3.1.1 Size of the largest nodules/mass: |\_|\_|.|\_|\*|\_|\_|.|\_|cm

4.11.3.1.2 SUV

4.11.3.1.3 Nature of the nodules/mass identified:

- [1] Affirmative benign [2] Suspected benign [3] Suspected malignant  
[4] Affirmative malignant [5] Not clear [6] Others (specify)

4.11.3.2 If [3], location of pulmonary metastasis

4.11.3.2.1 SUV



- 1  
2  
3 4.11.3.3 If [4], location of lymph node metastasis  
4 4.11.3.3.1 SUV  
5 4.11.3.4 If [5], location of adrenal gland metastasis  
6 4.11.3.4.1 SUV  
7  
8 4.11.3.5 If [6], location of bone metastases  
9 4.11.3.5.1 SUV  
10 4.11.3.6 If [7], location of other metastases  
11 4.11.3.6.1 SUV  
12  
13

## 14 5 Endoscopic examinations

### 15 5.1 Fiberoptic bronchoscopy

16 [1] Not performed (skip to 5.2)

17 [2] Performed

18 5.1.1 Date of performance (dd-mm-yyyy): |\_|\_|-|\_|\_|-|\_|\_|\_|\_|\_|

19 5.1.2 Diagnosis from fiberoptic bronchoscopy

20 [1] No abnormalities [2] Tumor

21 [3] Others (specify)

22 [4] Not clear

### 23 5.2 Lavage cytology/brushing

24 [1] Not performed (skip to 5.3)

25 [2] Not clear (skip to 5.3)

26 [3] Performed

27 5.2.1 Date of performance (dd-mm-yyyy): |\_|\_|-|\_|\_|-|\_|\_|\_|\_|\_|

### 28 5.3 Bronchoscopy clamp biopsy

29 [1] Not performed (skip to 5.4)

30 [2] Not clear (skip to 5.4)

31 [3] Performed

32 5.3.1 Date of performance (dd-mm-yyyy): |\_|\_|-|\_|\_|-|\_|\_|\_|\_|\_|

### 33 5.4 Bronchoscopy aspiration biopsy

34 [1] Not performed (skip to 5.5)

35 [2] Not clear (skip to 5.5)

36 [3] Performed

37 5.4.1 Date of performance (dd-mm-yyyy): |\_|\_|-|\_|\_|-|\_|\_|\_|\_|\_|

38 5.4.2 Type of bronchoscopy aspiration biopsy

39 [1] Endobroncheal ultrasonography [2] Electromagnetic-guided

40 [3] Transbronchial needle aspiration [4] Not clear

41 [5] Others (specify)

## 6 Laboratory/biological tests

6.0 Date of performance (dd-mm-yyyy): |\_|\_|-|\_|\_|-|\_|\_|\_|\_|

### 6.1 CEA

[1] Not performed (skip to 6.2)

[2] Not clear (skip to 6.2)

[3] Performed

#### 6.1.1 Date of performance if different from 6.0

(dd-mm-yyyy): |\_|\_|-|\_|\_|-|\_|\_|\_|\_|

#### 6.1.2 Test result (value-unit): \_\_\_\_\_ - \_\_\_\_\_

### 6.2 CA125

[1] Not performed (skip to 6.3)

[2] Not clear (skip to 6.3)

[3] Performed

#### 6.2.1 Date of performance if different from 6.0

(dd-mm-yyyy): |\_|\_|-|\_|\_|-|\_|\_|\_|\_|

#### 6.2.2 Test result (value-unit): \_\_\_\_\_ - \_\_\_\_\_

### 6.3 proGRP

[1] Not performed (skip to 6.4)

[2] Not clear (skip to 6.4)

[3] Performed

#### 6.3.1 Date of performance if different from 6.0

(dd-mm-yyyy): |\_|\_|-|\_|\_|-|\_|\_|\_|\_|

#### 6.3.2 Test result (value-unit): \_\_\_\_\_ - \_\_\_\_\_

### 6.4 SCC

[1] Not performed (skip to 6.5)

[2] Not clear (skip to 6.5)

[3] Performed

#### 6.4.1 Date of performance if different from 6.0

(dd-mm-yyyy): |\_|\_|-|\_|\_|-|\_|\_|\_|\_|

#### 6.4.2 Test result (value-unit): \_\_\_\_\_ - \_\_\_\_\_

### 6.5 NSE

[1] Not performed (skip to 6)

[2] Not clear (skip to 6.6)

[3] Performed

#### 6.5.1 Date of performance if different from 6.0

(dd-mm-yyyy): |\_|\_|-|\_|\_|-|\_|\_|\_|\_|

#### 6.5.2 Test result (value-unit): \_\_\_\_\_ - \_\_\_\_\_

### 6.6 CYFRA21-1

[1] Not performed (skip to 6.7)

[2] Not clear (skip to 6.7)

[3] Performed

#### 6.6.1 Date of performance if different from 6.0

- 1  
2  
3 (dd-mm-yyyy): |\_\_|\_\_|-|\_\_|\_\_|-|\_\_|\_\_|\_\_|\_\_|  
4 6.6.2 Test result (value-unit): \_\_\_\_\_ - \_\_\_\_\_  
5 6.7 WBC  
6 [1] Not performed (skip to 6.8)  
7 [2] Not clear (skip to 6.8)  
8 [3] Performed  
9 6.7.1 Date of performance if different from 6.0  
10 (dd-mm-yyyy): |\_\_|\_\_|-|\_\_|\_\_|-|\_\_|\_\_|\_\_|\_\_|  
11 6.7.2 Test result (value-unit): \_\_\_\_\_ - \_\_\_\_\_  
12 6.8 PLT  
13 [1] Not performed (skip to 6.9)  
14 [2] Not clear (skip to 6.9)  
15 [3] Performed  
16 6.8.1 Date of performance if different from 6.0  
17 (dd-mm-yyyy): |\_\_|\_\_|-|\_\_|\_\_|-|\_\_|\_\_|\_\_|\_\_|  
18 6.8.2 Test result (value-unit): \_\_\_\_\_ - \_\_\_\_\_  
19 6.9 Hb  
20 [1] Not performed (skip to 6.10)  
21 [2] Not clear (skip to 6.10)  
22 [3] Performed  
23 6.9.1 Date of performance if different from 6.0  
24 (dd-mm-yyyy): |\_\_|\_\_|-|\_\_|\_\_|-|\_\_|\_\_|\_\_|\_\_|  
25 6.9.2 Test result (value-unit): \_\_\_\_\_ - \_\_\_\_\_  
26 6.10 ALB  
27 [1] Not performed (skip to 6.11)  
28 [2] Not clear (skip to 6.11)  
29 [3] Performed  
30 6.10.1 Date of performance if different from 6.0  
31 (dd-mm-yyyy): |\_\_|\_\_|-|\_\_|\_\_|-|\_\_|\_\_|\_\_|\_\_|  
32 6.10.2 Test result (value-unit): \_\_\_\_\_ - \_\_\_\_\_  
33 6.11 Pre-ALB  
34 [1] Not performed (skip to 6.12)  
35 [2] Not clear (skip to 6.12)  
36 [3] Performed  
37 6.11.1 Date of performance if different from 6.0  
38 (dd-mm-yyyy): |\_\_|\_\_|-|\_\_|\_\_|-|\_\_|\_\_|\_\_|\_\_|  
39 6.11.2 Test result (value-unit): \_\_\_\_\_ - \_\_\_\_\_  
40 6.12 Ca  
41 [1] Not performed (skip to 6.13)  
42 [2] Not clear (skip to 6.13)  
43 [3] Performed  
44 6.12.1 Date of performance if different from 6.0  
45 (dd-mm-yyyy): |\_\_|\_\_|-|\_\_|\_\_|-|\_\_|\_\_|\_\_|\_\_|  
46 6.12.2 Test result (value-unit): \_\_\_\_\_ - \_\_\_\_\_  
47  
48  
49  
50  
51  
52  
53  
54  
55  
56  
57  
58  
59  
60

## 6.13 Fe

[1] Not performed (skip to 6.14)

[2] Not clear (skip to 6.14)

[3] Performed

## 6.13.1 Date of performance if different from 6.0

(dd-mm-yyyy): |\_|\_|-|\_|\_|-|\_|\_|\_|\_|

## 6.13.2 Test result (value-unit): \_\_\_\_\_ - \_\_\_\_\_

## 6.14 FIB

[1] Not performed (skip to 6.15)

[2] Not clear (skip to 6.15)

[3] Performed

## 6.14.1 Date of performance if different from 6.0

(dd-mm-yyyy): |\_|\_|-|\_|\_|-|\_|\_|\_|\_|

## 6.14.2 Test result (value-unit): \_\_\_\_\_ - \_\_\_\_\_

## 6.15 D-D

[1] Not performed (skip to 6.16)

[2] Not clear (skip to 6.16)

[3] Performed

## 6.15.1 Date of performance if different from 6.0

(dd-mm-yyyy): |\_|\_|-|\_|\_|-|\_|\_|\_|\_|

## 6.15.2 Test result (value-unit): \_\_\_\_\_ - \_\_\_\_\_

## 6.16 Na

[1] Not performed (skip to 6.17)

[2] Not clear (skip to 6.17)

[3] Performed

## 6.16.1 Date of performance if different from 6.0

(dd-mm-yyyy): |\_|\_|-|\_|\_|-|\_|\_|\_|\_|

## 6.16.2 Test result (value-unit): \_\_\_\_\_ - \_\_\_\_\_

## 6.17 LDL

[1] Not performed (skip to 6.18)

[2] Not clear (skip to 6.18)

[3] Performed

## 6.17.1 Date of performance if different from 6.0

(dd-mm-yyyy): |\_|\_|-|\_|\_|-|\_|\_|\_|\_|

## 6.17.2 Test result (value-unit): \_\_\_\_\_ - \_\_\_\_\_

## 6.18 LDL

[1] Not performed (skip to 6.19)

[2] Not clear (skip to 6.19)

[3] Performed

## 6.18.1 Date of performance if different from 6.0

(dd-mm-yyyy): |\_|\_|-|\_|\_|-|\_|\_|\_|\_|

## 6.18.2 Test result (value-unit): \_\_\_\_\_ - \_\_\_\_\_

## 6.19 TG

- [1] Not performed (skip to 6.20)
- [2] Not clear (skip to 6.20)
- [3] Performed

## 6.19.1 Date of performance if different from 6.0

(dd-mm-yyyy): --

## 6.19.2 Test result (value-unit): \_\_\_\_\_ - \_\_\_\_\_

## 6.20 TCHOL

- [1] Not performed (skip to 7.1)
- [2] Not clear (skip to 7.1)
- [3] Performed

## 6.20.1 Date of performance if different from 6.0

(dd-mm-yyyy): --

## 6.20.2 Test result (value-unit): \_\_\_\_\_ - \_\_\_\_\_

## 7 Heart and lung function examinations

## 7.1 Electrocardiogram examination

- [1] Not performed (skip to 7.2)
- [2] Performed

7.1.1 Date of performance (dd-mm-yyyy): --7.1.2 Heart rate:  times/minutes

## 7.1.3 Diagnosis from electrocardiogram examination

- [1] No abnormalities
- [2] Abnormalities(specify)

## 7.2 Lung function examinations

- [1] Not performed (skip to 8.1)
- [2] Not clear (skip to 8.1)
- [3] Performed

7.2.1 Date of performance (dd-mm-yyyy): --

## 7.2.2 FVC (Tested/predicted value): \_\_\_\_\_ / \_\_\_\_\_

## 7.2.3 FEV1(Tested/predicted value): \_\_\_\_\_ / \_\_\_\_\_

## 7.2.4 FEV1/FVC%(Tested/predicted value): \_\_\_\_\_ / \_\_\_\_\_

## 7.2.5 TLCO SB(Tested/predicted value): \_\_\_\_\_ / \_\_\_\_\_

## 7.2.6 Ventilation function assessment:

- |                      |                    |                        |
|----------------------|--------------------|------------------------|
| [1] No abnormalities | [2] Mildly reduced | [3] Moderately reduced |
| [4] Severely reduced | [5] Restrictive    | [6] Obstruction        |
| [7] Mixed            | [8] Not clear      |                        |

## 7.2.7 Lung capacity

- [1] No abnormalities
- [2] Increased total residue ratio
- [3] Low lung capacity
- [4] Not clear

## 7.2.8 Breath diffusion

- [1] No abnormalities
- [2] Reduced
- [3] Not clear

## 8 Histological/cytological examination

### 8.1 Preoperative cytological

[1] Not performed (skip to 8.2)

[2] Not clear (skip to 8.2)

[3] Performed

8.1.1 If [3], preoperative cytological method:

[1] Needle biopsy [2] Sputum specimen examination [3] Bronchial lavage

[4] Others (specify)

8.1.2 If [3], preoperative cytological result:

[1] With cancer cells [2] Without cancer cells [3] Uncertain lesion

[4] Not clear

8.1.2.1 If [1], cytological type

[1] Adenocarcinoma [2] Squamous cell carcinoma

[3] Small cell carcinoma [4] Carcinoid

[5] Large cell carcinoma [6] Squamous cell carcinoma

[7] Sarcomatoid carcinoma [8] carcinoma from sialaden

[9] Not clear [10] Others (specify)

8.1.2.1.1 If [1], first class subtype code

[1] Pre-invasion lesion [2] Microinvasive adenocarcinoma

[3] Invasive adenocarcinoma [4] Variant invasive adenocarcinoma

[5] Others (specify)

[6] Not clear

8.1.2.1.1.1 If [1], second class subtype code

[1] Atypical adenocarcinoma like hyperplasia

[2] Adenocarcinoma in situ

[6] Not clear

8.1.2.1.1.2 If [3], second class subtype code

[1] Accumbens dominated [2] Acinar dominated

[3] Papillary dominated [4] Micro papillae dominated

[5] Entities with mucus dominated

[6] Not clear

8.1.2.1.1.3 If [4], second class subtype code

[1] Mucinous invasive adenocarcinoma

[2] Colloid [3] Fetal

[4] Intestinal [5] Others (specify)

[6] Not clear

### 8.2 Preoperative histological

[1] Not performed (skip to 10.4)

[2] Not clear (skip to 10.4)

[3] Performed

8.2.1 If [3], method of preoperative histological biopsy:

[1] Ultrasound guided aspiration biopsy [2] CT guided aspiration biopsy

[3] Bronchoscopic biopsy [4] Nuclear magnetic puncture

- 1  
2  
3 [5] Not clear [6] Others (specify)  
4 8.2.1.1 If [3], results of preoperative histological biopsy:  
5 [1] With cancer cells [2] Without cancer cells [3] Uncertain lesion  
6 [4] Not clear  
7  
8 8.2.2.1 If [1], histological type:  
9 [1] Adenocarcinoma [2] Squamous cell carcinoma  
10 [3] Small cell carcinoma [4] Carcinoid  
11 [5] Large cell carcinoma [6] Squamous cell carcinoma  
12 [7] Sarcomatoid carcinoma [8] carcinoma from sialaden  
13 [9] Not clear [10] Others (specify)  
14  
15 8.2.2.1.1.1 If [1], second class subtype code  
16 [1] Atypical adenocarcinoma like hyperplasia  
17 [2] Adenocarcinoma in situ  
18 [6] Not clear  
19  
20 8.2.2.1.1.2 If [3], second class subtype code  
21 [1] Accumbens dominated [2] Acinar dominated  
22 [3] Papillary dominated [4] Micro papillae dominated  
23 [5] Entities with mucus dominated  
24 [6] Not clear  
25  
26 8.2.2.1.1.3 If [4], second class subtype code  
27 [1] Mucinous invasive adenocarcinoma  
28 [2] Colloid [3] Fetal  
29 [4] Intestinal [5] Others (specify)  
30 [6] Not clear  
31  
32 8.2.2.2 If 8.2.2.1 information not available, please tick in histology type:  
33 [1] Small cell lung cancer [2] Non-small cell lung cancer [3] Benign lesion  
34 [4] Not clear [5] Others (specify)  
35  
36 8.3 Biopsy of frozen mass:  
37 [1] Not performed (skip to 8.4)  
38 [2] Not clear (skip to 8.4)  
39 [3] Performed  
40  
41 8.3.1 If [3], diagnosis of frozen mass biopsy:  
42 [1] Adenocarcinoma [2] Squamous cell carcinoma  
43 [3] Small cell carcinoma [4] Carcinoid  
44 [5] Large cell carcinoma [6] Squamous cell carcinoma  
45 [7] Sarcomatoid carcinoma [8] carcinoma from sialaden  
46 [9] Not clear [10] Others (specify)  
47  
48 8.3.2.1.1.1 If [1], second class subtype code  
49 [1] Atypical adenocarcinoma like hyperplasia  
50 [2] Adenocarcinoma in situ  
51 [6] Not clear  
52  
53 8.3.2.1.1.2 If [3], second class subtype code  
54 [1] Accumbens dominated [2] Acinar dominated  
55 [3] Papillary dominated [4] Micro papillae dominated  
56  
57  
58  
59  
60

- 1  
2  
3 [5] Entities with mucus dominated  
4 [6] Not clear  
5 8.3.2.1.1.3 If [4], second class subtype code  
6 [1] Mucinous invasive adenocarcinoma  
7 [2] Colloid [3] Fetal  
8 [4] Intestinal [5] Others (specify)  
9 [6] Not clear  
10  
11 8.4 Biopsy of lymph node:  
12 [1] Not performed (skip to 8.5)  
13 [2] Not clear (skip to 8.5)  
14 [3] Performed  
15 8.4.1 If [3], result of lymph node biopsy:  
16 [1] Metastasis [2] No metastasis  
17  
18 8.5 Biopsy of frozen margin of bronchus:  
19 [1] Not performed (skip to 8.6)  
20 [2] Not clear (skip to 8.6)  
21 [3] Performed  
22 8.5.1 If [3], result of frozen margin of bronchus:  
23 [1] Margin tumor [2] No margin tumor  
24  
25  
26 8.6 Postoperative histological  
27 [1] Not performed (skip to 9)  
28 [2] Not clear (skip to 9)  
29 [3] Performed  
30 8.6.1 If [3], number of tumors:  
31 [1] Solitary tumor [2] More than 2 nodules [3] Not clear  
32 8.6.1.1 The largest tumor size: \*\*cm  
33 8.6.1.2 If multiple tumor, the smallest tumor size: \*\*cm  
34  
35 8.6.2 Pathologic diagnosis  
36 [1] Adenocarcinoma [2] Squamous cell carcinoma  
37 [3] Small cell carcinoma [4] Carcinoid  
38 [5] Large cell carcinoma [6] Squamous cell carcinoma  
39 [7] Sarcomatoid carcinoma [8] carcinoma from sialaden  
40 [9] Not clear [10] Others (specify)  
41  
42 8.6.2.1 If [1], second class subtype code  
43 [1] Atypical adenocarcinoma like hyperplasia  
44 [2] Adenocarcinoma in situ  
45 [6] Not clear  
46 8.6.2.1.1 If [3], second class subtype code  
47 [1] Accumbens dominated [2] Acinar dominated  
48 [3] Papillary dominated [4] Micro papillae dominated  
49 [5] Entities with mucus dominated  
50 [6] Not clear  
51 8.6.2.1.2 If [4], second class subtype code  
52 [1] Mucinous invasive adenocarcinoma  
53  
54  
55  
56  
57  
58  
59  
60



- 1  
2  
3 [2] Colloid [3] Fetal  
4 [4] Intestinal [5] Others (specify)  
5 [6] Not clear  
6  
7 8.6.3 Differentiation degree:  
8 [1] Well differentiated [2] Well and moderately differentiated  
9 [3] Moderately differentiated [4] Poorly differentiated  
10 [5] Middle and low differentiation [6] Undifferentiated  
11 [7] Not clear  
12  
13 8.6.4 Associated with intrapulmonary metastasis  
14 [1] Yes [2] No (skip to 10.11) [3] Not clear(skip to 10.11)  
15 10.10.1 Invasion of pleura?  
16 [1] Yes [2] No [3] Not clear  
17  
18 8.6.4.1 Invasion of the main bronchi?  
19 [1] Yes, distance is less than 2cm [2] Yes, distance is more than 2cm  
20 [3] No [3] Not clear  
21  
22 8.6.4.2 Invasion of chest wall/septum/mediastinum/pericardium?  
23 [1] Yes(specify) [2] No [3] Not clear  
24 8.6.4.3 Invasion of mediastinum/heart/trachea/esophagus/vertebral body/carina?  
25 [1] Yes(specify) [2] No [3] Not clear  
26  
27 8.7 Resection margin positive?  
28 [1] Not performed (skip to 10.6)  
29 [2] Not clear (skip to 10.6)  
30 [3] Positive  
31 [4] Negative  
32  
33 8.8 The total number of lymph nodes detected  
34 8.9 The total number of lymph node metastasis  
35 8.10 Lymph node metastasis site  
36 [1] No metastasis [2] Ipsilateral bronchi or hilum  
37 [3] Ipsilateral mediastinum or carina [4] Contralateral mediastinum or hilum of lung, clavicle  
38 [5] Not clear  
39  
40 9 Tumor marker  
41 9.1 Her-2(C-erbB-2) detection  
42 [1] Not performed (skip to 9.2)  
43 [2] Not clear (skip to 9.2)  
44 [3] Performed (skip to 9.2)  
45 9.1.1 If [3], method of detection  
46 [1] Immunohistochemistry [2] FISH [3] Other(Specify)  
47 9.1.2 If [3], result of detection  
48 [1] Positive [2] Negative [3] Other(Specify) [4] Not clear  
49  
50 9.2 Anaplastic lymphoma kinase detection  
51 [1] Not performed (skip to 9.3)  
52 [2] Not clear (skip to 9.3)  
53 [3] Performed (skip to 9.3)  
54 9.2.1 If [3], method of detection  
55  
56  
57  
58  
59  
60

- 1  
2  
3 [1] Immunohistochemistry [2] Genetic testing [3] Other(Specify)  
4 9.2.2 If [3], result of detection  
5 [1] Positive [2] Negative [3] Other(Specify) [4] Not clear  
6  
7 9.3 Epidermal growth factor receptor detection  
8 [1] Not performed (skip to 9.4)  
9 [2] Not clear (skip to 9.4)  
10 [3] Performed (skip to 9.4)  
11 9.4.1 If [3], method of detection  
12 [1] Immunohistochemistry [2] Genetic testing [3] Other(Specify)  
13 9.3.2 If [3], result of detection  
14 [1] Positive [2] Negative [3] Other(Specify) [4] Not clear  
15  
16 9.4 K-ras detection  
17 [1] Not performed (skip to 9.5)  
18 [2] Not clear (skip to 9.5)  
19 [3] Performed (skip to 9.5)  
20 9.4.1 If [3], method of detection  
21 [1] Immunohistochemistry [2] Gene mutation detection [3] Other(Specify)  
22 9.4.2 If [3], result of detection  
23 [1] Positive [2] Negative [3] Other(Specify) [4] Not clear  
24  
25 9.5 Other factor types detection  
26 [1] Not performed (skip to 9.6)  
27 [2] Not clear (skip to 9.6)  
28 [3] Performed (skip to 9.6)  
29 9.6.1 If [3], method of detection  
30 [1] Immunohistochemistry [2] Gene mutation detection [3] Other(Specify)  
31 9.6.2 If [3], result of detection  
32 [1] Positive [2] Negative [3] Other(Specify) [4] Not clear  
33  
34  
35  
36  
37

## 38 9 Staging of lung cancer

- 39  
40  
41 9.1 Type of staging available  
42 [1] Clinical stage [2] Pathological staging [3] Not staging  
43 [4] Not clear  
44 9.2 Staging methods  
45 [1] Clinical imaging [2] Pathological staging [3] Postoperative pathology  
46 [4] No [5] Not clear  
47  
48 9.3 If staged, details of TNM staging  
49 9.3.1 Staging system  
50 [1] The 6<sup>th</sup> edition of UICC/AJCC staging, published in 2002  
51 [2] The 7<sup>th</sup> edition of AHCC staging, published in 2009  
52 9.3.2 T staging  
53 [1] T1; [2] T2; [3] T3; [4] T4; [5] Tx; [6] Not clear  
54 9.3.3 N staging  
55 [1] N1; [2] N2; [3] N3; [4] N0; [5] Not clear  
56  
57  
58  
59  
60

## 9.3.4 M staging

[1] M1; [2] Mx; [3] M0; [4] Not clear

## 9.3.5 TNM staging

[1] Stage I; [2] Stage IIA; [3] Stage IIB; [4] Stage IIIA;  
[5] Stage IIIB; [6] Stage IV; [7] Others (specify); [8] Not clear

## 9.4 Type of lung cancer:

[1] Small cell lung cancer [2] Non-Small cell lung cancer  
[3] Mixed small cell lung cancer [4] Not clear  
[5] Others (specify)

## 9.4.1 If [1], state of lesion

[1] Restricted [2] Pervasive  
[3] Other (specify)

## 9.4.2 If [2], state of lesion

[1] Early stage [2] Locally advanced  
[3] Advanced [4] Not clear

**Part E: Treatment procedures and findings/results**

## 9.1 Surgical treatment

[1] Not performed (skip to 9.2)  
[2] Thoracotomy  
[3] Video-assisted thoracoscopic surgery  
[4] Thoracoscope assisted small incision surgery  
[5] Others (specify)  
[6] Not clear(skip to 9.2)

## 9.1.1 Details of resection:

[1] Lobectomy [2] Segmental resection  
[3] Combined lobectomy [4] Completely pneumonectomy  
[5] Sleeve lobectomy [6] Resection and reconstruction of carina  
[7] Others (specify) [8] Not clear

## 9.1.1.1 If [2], name of the segment

## 9.1.1.2 If [4], treatment of pulmonary arteriovenous in pericardium

[1] Yes [2] No [3] Not clear

## 9.1.2 If [3], type of thoracoscope assistance:

[1] Single hole [2] Double holes [3] Three holes  
[4] Multiple holes [5] Not clear

## 9.1.2.1 Conversion from video-assisted thoracoscopic surgery to Thoracotomy

[1] Yes [2] No [3] Not clear

## 9.1.3 Performance of rapid pathology

[1] Yes [2] No [3] Not clear

## 9.1.4 Findings from intraoperative exploration

## 9.1.4.1 Tumor site

[1] Left [2] Right [3] Upper lobes  
[4] Bottom lobes [5] Middle lobes [6] Not clear

- 1  
2  
3 9.1.4.2 Cross lobes  
4 [1] Yes [2] No [3] Not clear  
5 9.1.4.3 Pleural involvement/ Shrinkage  
6 [1] Yes [2] No [3] Not clear  
7  
8 9.1.4.4 Largest diameter of tumor: |\_|\_|.|\_|\_|cm  
9 9.1.4.5 Pleural metastasis  
10 [1] Yes [2] No [3] Not clear  
11 9.1.4.6 Intrapulmonary metastasis  
12 [1] Yes [2] No [3] Not clear  
13 9.1.4.7 Foreign invasion  
14 [1] Yes [2] No [3] Not clear  
15 9.1.4.7.1 If [1], name of invaded tissue:  
16 9.1.4.8 Dual(Multiple) primary tumor  
17 [1] Yes [2] No [3] Not clear  
18  
19 9.1.5 Lymph node dissection  
20 [1] Systematicness [2] Sampling [3] Not cleaned [4] Not Clear  
21 9.1.6 Classification of surgery  
22 [1] Radical cure [2] Palliative treatment [3] Not clear  
23  
24 9.2 Radiation therapy  
25 [1] Not performed (skip to 9.3)  
26 [2] Not clear (skip to 9.3)  
27 [3] Performed  
28 9.2.1 If [3], type of radiation therapy:  
29 [1] Preoperative radiotherapy [2] Postoperative radiotherapy  
30 [3] Radical radiation therapy  
31 9.2.1.1 Combined with chemotherapy:  
32 [1] Not performed (skip to 10.1.3)  
33 [2] Not clear (skip to 10.1.3)  
34 [3] Performed  
35 9.2.1.1.1 If [3], type of chemo-radiotherapy:  
36 [1] Sequence chemoradiotherapy [2] Concurrent chemoradiotherapy  
37 9.2.1.1.2 If [2], name of the chemotherapy drugs  
38 9.2.1.1.3 If [2], chemotherapy cycles:  
39 [1] Every week [2] Biweekly [3] Every 3 weeks  
40 [4] Every 4 weeks [5] Not clear  
41 9.2.1.2 Radiotherapy technique  
42 [1] Routine radiotherapy [2] Three-dimensional conformal radiotherapy  
43 [3] Tomo treatment [4] Static intensity modulated radiotherapy  
44 [5] Stereotactic radiotherapy [6] Rotational intensity modulated radiotherapy  
45 [7] Not clear [8] Others (specify)  
46 9.2.1.3 Polarization  
47 [1] Conventional simulator [2] CT simulation [3] 4D-CT  
48 [4] Not clear  
49 9.2.1.4 Methods of pretreatment position verification  
50  
51  
52  
53  
54  
55  
56  
57  
58  
59  
60

- [1] No methods [2] Image guide radiation therapy  
 [3] Not clear [4] Electronic Portal Imaging Device  
 [5] Others (specify)

#### 9.2.1.5 Radiation target area (multiple choice)

- [1] Primary foci [2] Postoperative stump and tumor bed  
 [3] Involving lymph node irradiation [4] Choose lymph node irradiation  
 [5] Metastatic lesions [6] Not clear

#### 9.2.1.6 Radiotherapy dose division program

| No  | Radiation energy | Total dose Gy | Number of times | Treatment time (days) |
|-----|------------------|---------------|-----------------|-----------------------|
| [1] |                  |               |                 |                       |
| [2] |                  |               |                 |                       |
| [3] |                  |               |                 |                       |

### 9.3 Chemotherapy

[1] Not performed (skip to 9.4)

[2] Not clear (skip to 9.4)

[3] Performed

#### 9.3.1 If [3], type of chemotherapy:

[1] Neoadjuvant chemotherapy [2] Postoperative adjuvant chemotherapy

[3] Advanced chemotherapy [4] Others (specify)

#### 9.3.1.1 If [1], neoadjuvant chemotherapy regimen

[1] Vinorelbine/Cisplatin+Vinorelbine/Carboplatin+Vinorelbine/Other platinum

[2] Paclitaxel/Cisplatin+Paclitaxel/Carboplatin+Paclitaxel/Other platinum

[3] Docetaxel/Cisplatin+ Docetaxel/Carboplatin +Docetaxel/Other platinum

[4] Pemetrexed/Cisplatin+Pemetrexed/Carboplatin+ Pemetrexed/Other platinum

[5] Gemcitabine/Cisplatin +Gemcitabine/Carboplatin +Gemcitabine/Other platinum

[6] Others (specify)

[7] Not clear

#### 9.3.1.2 If [2], postoperative adjuvant chemotherapy regimen:

[1] Vinorelbine/Cisplatin+Vinorelbine/Carboplatin+Vinorelbine/Other platinum

[2] Paclitaxel/Cisplatin+Paclitaxel/Carboplatin+Paclitaxel/Other platinum

[3] Docetaxel/Cisplatin+Docetaxel/Carboplatin+Docetaxel/Other platinum

[4] Pemetrexed/Cisplatin+Pemetrexed/Carboplatin+Pemetrexed/Other platinum

[5] Gemcitabine/Cisplatin+Gemcitabine/Carboplatin+Gemcitabine/Other platinum

[6] Etoposide/Cisplatin+Etoposide/Carboplatin+Cyclophosphamide/Adriamycin/  
 Vincristine

[7] Others (specify)

[8] Not clear

#### 9.3.1.3 If [3], advanced chemotherapy regimen:

[1] Cisplatin+Carboplatin+Other platinum

[2] Paclitaxel+Docetaxel

[3] Gemcitabine

[4] Pemetrexed

[5] Vinorelbine+Vincristine

[6] Irinotecan+Topotecan

- 1  
2  
3 [7] Tegafur  
4 [8] Etoposide  
5 [9] Cytosan+Ifosfamide  
6 [10] Adriamycin  
7 [11] Others(specify)  
8 [12] Not clear  
9  
10 9.4 Complication treatment  
11 9.4.1 Superior vena cava syndrome  
12 [1] Not appeared(skip to 9.4.2) [2] Not clear(skip to 9.4.2) [3] Appeared  
13 9.4.1.1 If [3], duration (month):  
14 9.4.1.2 If [3], treatment:  
15 [1] No (skip to 9.4.2) [2] Not clear(skip to 9.4.2) [3] Yes  
16 9.4.1.2.1 If[3], treatment effect:  
17 [1] Improved [2] Progressed [3] Stable [4] Not clear  
18  
19 9.4.2 Spinal cord compression syndrome  
20 [1] Not appeared (skip to 9.4.3) [2] Not clear(skip to 9.4.3) [3] Appear  
21 9.4.2.1 If [3], duration (month):  
22 9.4.2.2 If [3], treatment:  
23 [1] No (skip to 9.4.3) [2] Not clear(skip to 9.4.3) [3] Yes  
24 9.4.2.2.1 If [3], treatment effect:  
25 [1] Improved [2] Progressed [3] Stable [4] Not clear  
26  
27 9.4.3 Brain metastases  
28 [1] Not appeared (skip to 9.4.4) [2] Not clear(skip to 9.4.4) [3] Appear  
29 9.4.3.1 If [3], duration (month):  
30 9.4.3.2 If [3], treatment:  
31 [1] No (skip to 9.4.4) [2] Not clear(skip to 9.4.4) [3] Yes  
32 9.4.3.2.1 If [3], treatment effect:  
33 [1] Improved [2] Progressed [3] Stable [4] Not clear  
34  
35 9.4.4 Meningeal metastases  
36 [1] Not appeared (skip to 9.4.5) [2] Not clear(skip to 9.4.5) [3] Appear  
37 9.4.4.1 If [3], duration (month):  
38 9.4.4.2 If [3], treatment:  
39 [1] No (skip to 9.4.5) [2] Not clear(skip to 9.4.5) [3] Yes  
40 9.4.4.2.1 If [3], treatment effect:  
41 [1] Improved [2] Progressed [3] Stable [4] Not clear  
42  
43 9.4.5 Pleural effusion  
44 [1] Not appeared (skip to 9.4.6) [2] Not clear(skip to 9.4.6) [3] Appear  
45 9.4.5.1 If [3], duration (month):  
46 9.4.5.2 If [3], treatment:  
47 [1] No (skip to 9.4.6) [2] Not clear(skip to 9.4.6) [3] Yes  
48 9.4.5.2.1 If [3], treatment effect:  
49 [1] Improved [2] Progressed [3] Stable [4] Not clear  
50  
51 9.4.6 Pyoperitoneum  
52 [1] Not appeared (skip to 9.4.7) [2] Not clear(skip to 9.4.7) [3] Appear  
53  
54  
55  
56  
57  
58  
59  
60

- 1  
2  
3 9.4.6.1 If [3], duration (month):  
4 9.4.6.2 If [3], treatment:  
5 [1] No (skip to 9.4.7) [2] Not clear(skip to 9.4.7) [3] Yes  
6  
7 9.4.6.2.1 If [3], treatment effect:  
8 [1] Improved [2] Progressed [3] Stable [4] Not clear  
9  
10 9.4.7 Pericardial effusion  
11 [1] Not appeared(skip to 9.4.8) [2] Not clear(skip to 9.4.8) [3] Appear  
12 9.4.7.1 If [3], duration (month):  
13 9.4.7.2 If [3], treatment:  
14 [1] No (skip to 9.4.8) [2] Not clear(skip to 9.4.8) [3] Yes  
15 9.4.7.2.1 If [3], treatment effect:  
16 [1] Improved [2] Progressed [3] Stable [4] Not clear  
17  
18 9.4.8 Intestinal obstruction  
19 [1] Not appeared(skip to 9.4.9) [2] Not clear(skip to 9.4.9) [3] Appear  
20 9.4.8.1 If [3], duration (month):  
21 9.4.8.2 If [3], treatment:  
22 [1] No (skip to 9.4.9) [2] Not clear(skip to 9.4.9) [3] Yes  
23 9.4.8.2.1 If [3], treatment effect:  
24 [1] Improved [2] Progressed [3] Stable [4] Not clear  
25  
26 9.4.9 Pain  
27 [1] Not appeared (skip to 9.4.10) [2] Not clear(skip to 9.4.10) [3] Appear  
28 9.4.9.1 If [3], duration (month):  
29 9.4.9.2 If [3], treatment:  
30 [1] No (skip to 9.4.10) [2] Not clear(skip to 9.4.10) [3] Yes  
31 9.4.9.2.1 If [3], treatment effect (site and score):  
32  
33 9.4.10 Cerebral thrombosis/ hemorrhage  
34 [1] Not appeared (skip to 9.4.11) [2] Not clear(skip to 9.4.11) [3] Appear  
35 9.4.10.1 If [3], duration (month):  
36 9.4.10.2 If [3], treatment:  
37 [1] No (skip to 9.4.11) [2] Not clear(skip to 9.4.11) [3] Yes  
38 9.4.10.2.1 If [3], treatment effect:  
39 [1] Improved [2] Progressed [3] Stable [4] Not clear  
40  
41 9.4.11 Interstitial pneumonia  
42 [1] Not appeared(skip to 9.4.12) [2] Not clear(skip to 9.4.12) [3] Appear  
43 9.4.11.1 If [3], duration (month):  
44 9.4.11.2 If [3], treatment:  
45 [1] No (skip to 9.4.12) [2] Not clear(skip to 9.4.12) [3] Yes  
46 9.4.11.2.1 If [3], treatment effect:  
47 [1] Improved [2] Progressed [3] Stable [4] Not clear  
48  
49 9.4.12 Pulmonary embolism  
50 [1] Not appeared(skip to 9.4.13) [2] Not clear(skip to 9.4.13) [3] Appear  
51 9.4.12.1 If [3], duration (month):  
52 9.4.12.2 If [3], treatment:  
53 [1] No (skip to 9.4.13) [2] Not clear(skip to 9.4.13) [3] Yes  
54  
55  
56  
57  
58  
59  
60

- 1  
2  
3 9.4.12.2.1 If [3], treatment effect:  
4 [1] Improved [2] Progressed [3] Stable [4] Not clear  
5 9.4.13 Cardiac insufficiency  
6 [1] Not appeared(skip to 9.4.14) [2] Not clear(skip to 9.4.14) [3] Appear  
7 9.4.13.1 If [3], duration (month):  
8 9.4.13.2 If [3], treatment:  
9 [1] No (skip to 9.4.14) [2] Not clear(skip to 9.4.14) [3] Yes  
10 9.4.13.2.1 If [3], treatment effect:  
11 [1] Improved [2] Progressed [3] Stable [4] Not clear  
12 9.4.14 Arrhythmia  
13 [1] Not appeared(skip to 9.4.15) [2] Not clear(skip to 9.4.15) [3] Appear  
14 9.4.14.1 If [3], duration (month):  
15 9.4.14.2 If [3], treatment:  
16 [1] No (skip to 9.4.15) [2] Not clear(skip to 9.4.15) [3] Yes  
17 9.4.14.2.1 If [3], treatment effect:  
18 [1] Improved [2] Progressed [3] Stable [4] Not clear  
19 9.4.15 Hypercoagulable state  
20 [1] Not appeared (skip to 9.5) [2] Not clear(skip to 9.5) [3] Appear  
21 9.4.15.1 If [3], duration (month):  
22 9.4.15.2 If [3], treatment:  
23 [1] No (skip to 9.5) [2] Not clear(skip to 9.5) [3] Yes  
24 9.4.15.2.1 If [3], treatment effect:  
25 [1] Improved [2] Progressed [3] Stable [4] Not clear  
26 9.5 Other procedures  
27 9.5.1 Interdisciplinary consultation  
28 [1] No (skip to 9.5.2) [2] Not clear(skip to 9.5.2) [3] Yes  
29 9.5.1.1 Disciplines involved  
30 [1] Neurology [2] Infectious diseases [3] Nephrology  
31 [4] Endocrinology [5] Cardiovascular diseases  
32 [6] Others (specify)  
33 9.5.1.2 Total times of consultation:  
34 9.5.2 Psychological/behavioral intervention  
35 [1] No (skip to 9.5.3) [2] Not clear(skip to 9.5.3) [3] Yes  
36 9.5.2.1 Type of interventions performed  
37 [1] Neurology [2] Infectious diseases [3] Nephrology  
38 [4] Endocrinology [5] Cardiovascular diseases  
39 [6] Others (specify)  
40 9.5.2.2 Total sessions of intervention performed:  
41 9.5.3 Traditional Chinese medicine used  
42 [1] No (skip to 10.1) [2] Not clear(skip to 10.1) [3] Yes  
43 9.5.2.1 Regimen of TCM used (specify):  
44  
45 9.5.2.2 Duration of TCM use (days):  
46  
47  
48  
49  
50  
51  
52  
53  
54  
55  
56  
57  
58  
59  
60



1  
2  
3  
4  
5  
6  
7  
8  
9  
10  
11  
12  
13  
14  
15  
16  
17  
18  
19  
20  
21  
22  
23  
24  
25  
26  
27  
28  
29  
30  
31  
32  
33  
34  
35  
36  
37  
38  
39  
40  
41  
42  
43  
44  
45  
46  
47  
48  
49  
50  
51  
52  
53  
54  
55  
56  
57  
58  
59  
60

**Part F: Charges on the inpatient care**

10.1 Total inpatient care fee:

10.2 Registration fee

10.3 Bed fee

10.4 Examination fee

10.5 Treatment fee

10.6 Operation fee

10.7 Laboratory fee

10.8 Nursing fee

10.9 Medicines fee

10.10 Other fee

Name of data extractor:

Date of data extraction(dd-mm-yyyy): |\_|\_|-|\_|\_|-|\_|\_|\_|\_|



1  
2  
3  
4  
5  
6  
7  
8  
9  
10  
11  
12  
13  
14  
15  
16  
17  
18  
19  
20  
21  
22  
23  
24  
25  
26  
27  
28  
29  
30  
31  
32  
33  
34  
35  
36  
37  
38  
39  
40  
41  
42  
43  
44  
45  
46  
47  
48  
49  
50  
51  
52  
53  
54  
55  
56  
57  
58  
59  
60

4. How are you (is he/she) now?

[1] Alive [2] Deceased

4.1. If [2], when did it happen (dd-mm-yyyy) ? |\_|\_|-|\_|\_|-|\_|\_|\_|\_|

5. In addition to the inpatient care and medical checkups mentioned above, have you ( or has he/she) tried other measures to cure the lung cancer?

[1] Yes [2] No (skip to ending) [3] Not clear (skip to ending)

5.1. If yes, please tell me, one-by-one, what is it and how often it has/had been?

| No. | Name of practice | Description of practice | Frequency | Length (months) |
|-----|------------------|-------------------------|-----------|-----------------|
| [1] |                  |                         |           |                 |
| [2] |                  |                         |           |                 |
| [3] |                  |                         |           |                 |
| [4] |                  |                         |           |                 |
| [5] |                  |                         |           |                 |
| [6] |                  |                         |           |                 |
| [7] |                  |                         |           |                 |
| [8] |                  |                         |           |                 |
| [9] |                  |                         |           |                 |

(Please add more lines as necessary)

Name of data extractor:

Date of data extraction(dd-mm-yyyy): |\_|\_|-|\_|\_|-|\_|\_|\_|\_|:

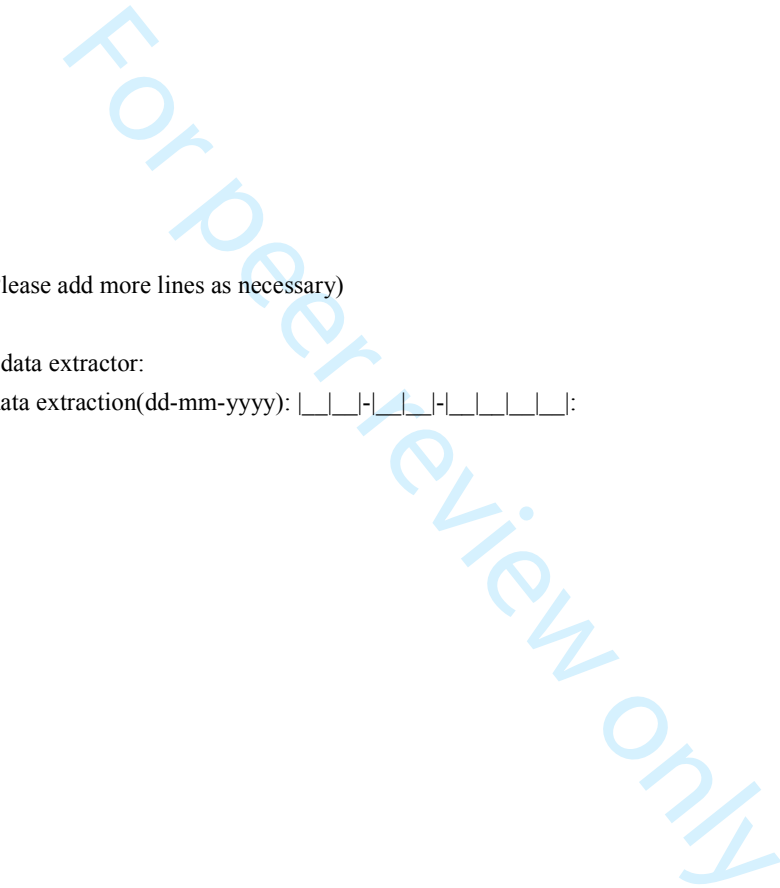

# BMJ Open

## Pathways and cost-effectiveness of routine lung cancer inpatient care in rural Anhui, China: a retrospective cohort study protocol

|                                 |                                                                                                                                                                                                                                                                                                                                                                                                                                                                                                                                                                                      |
|---------------------------------|--------------------------------------------------------------------------------------------------------------------------------------------------------------------------------------------------------------------------------------------------------------------------------------------------------------------------------------------------------------------------------------------------------------------------------------------------------------------------------------------------------------------------------------------------------------------------------------|
| Journal:                        | <i>BMJ Open</i>                                                                                                                                                                                                                                                                                                                                                                                                                                                                                                                                                                      |
| Manuscript ID                   | bmjopen-2017-018519.R1                                                                                                                                                                                                                                                                                                                                                                                                                                                                                                                                                               |
| Article Type:                   | Protocol                                                                                                                                                                                                                                                                                                                                                                                                                                                                                                                                                                             |
| Date Submitted by the Author:   | 05-Oct-2017                                                                                                                                                                                                                                                                                                                                                                                                                                                                                                                                                                          |
| Complete List of Authors:       | Shen, XingRong; Anhui Medical University School of Health Service Management<br>Diao, MengJie; Anhui Medical University School of Health Service Management<br>Feng, Rui; Anhui Medical University, Library Department of Literature Retrieval and Analysis<br>Lu, ManMan ; Anhui Medical University School of Health Service Management<br>Zhang, PanPan ; Anhui Medical University School of Health Service Management<br>Jiang, Tao ; Anhui Medical University School of Health Service Management<br>Wang, DeBin; Anhui Medical University, School of Health Services Management |
| <b>Primary Subject Heading</b>: | Health economics                                                                                                                                                                                                                                                                                                                                                                                                                                                                                                                                                                     |
| Secondary Subject Heading:      | Health services research                                                                                                                                                                                                                                                                                                                                                                                                                                                                                                                                                             |
| Keywords:                       | cost effectiveness, lung cancer, inpatient care, retrospective study, China                                                                                                                                                                                                                                                                                                                                                                                                                                                                                                          |
|                                 |                                                                                                                                                                                                                                                                                                                                                                                                                                                                                                                                                                                      |

SCHOLARONE™  
Manuscripts

# Pathways and cost-effectiveness of routine lung cancer inpatient care in rural Anhui, China: a retrospective cohort study protocol

XingRong Shen\*, MengJie Diao\*, Rui Feng, ManMan Lu, PanPan Zhang, Tao Jiang, Debin Wang<sup>#</sup>

**Corresponding author: Debing Wang.**

Post address: 81 Meishan Road, Hefei, Anhui, China. 230032.

Email: [dbwang@vip.sina.com](mailto:dbwang@vip.sina.com)

Telephone: (0086) 5116395

**XingRong Shen:**

School of Health Service Management, Anhui Medical University, Hefei, Anhui, China.

**MengJie Diao:**

School of Health Service Management, Anhui Medical University, Hefei, Anhui, China.

**Rui Feng:**

Department of Literature Review and Analysis, Library of Anhui Medical University, Hefei, Anhui, China.

**ManMan Lu:**

School of Health Service Management, Anhui Medical University, Hefei, Anhui, China.

**PanPan Zhang:**

School of Health Service Management, Anhui Medical University, Hefei, Anhui, China.

**Tao Jiang:**

School of Health Service Management, Anhui Medical University, Hefei, Anhui, China.

**Word count: 3686**

## ABSTRACT

**Introduction:** Routine inpatient care (RIC) for cancer patients forms various pathways of clinical procedures. Although most of the individual procedures comprising the pathways have been tested via clinical trials, little is known about the collective cost-effectiveness of the pathways as a whole. This study aims at identifying pathways of RIC procedures for lung cancer patients from rural Anhui, China and examining determinants of the pathways and their links to cost-effectiveness.

**Methods and analysis:** The study adopts a retrospective cohort study design and proceeds in 5 steps. Step 1 defines 4 main categories of study variables including clinical procedures, direct cost and effectiveness of procedures, and factors affecting use of these procedures and their cost and effectiveness. Step 2 selects a cohort of 5000 lung cancer patients diagnosed between July 1, 2014 and June 30, 2015 from rural Anhui by clustered-random sampling. Step 3 retrieves the records of all the inpatient care episodes due to the lung cancer and extracts data about RIC procedures, proximate patient outcomes (e.g., Karnofsky performance status, lung function score) and related factors (e.g., stage of cancer, age, gender) by 2 independent clinician researchers using a pre-developed worksheet. Step 4 estimates the direct cost of each of the RIC procedures using micro-costing and collects data about ultimate patient outcomes (survival and progression-free survival) through a follow up survey of patients and/or their close relatives. Step 5 analyzes data collected and explores pathways of RIC procedures and their relations with patient outcomes, costs, cost-effect ratios and a whole range of clinical and socio-demographic factors using multivariate regression and path models.

**Ethics and dissemination:** The study protocol has been approved by authorized ethics committee. Findings from the study will be disseminated through conventional academic routes such as peer-reviewed publications and presentations and regional, national and international conferences.

### Trial registry

ISRCTN25595562

**Key words:** cost effectiveness, lung cancer, inpatient care, retrospective study, China

## Strengths and limitations of this study

- The study adopts a retrospective cohort study design involving a large representative sample of community patients;
- It evaluates cost-effectiveness of pathways of clinical procedures as a whole rather than individual procedures;
- It examines pathways of routine inpatient care for a huge but understudied Chinese rural population;
- It extracts data from routine records kept at different hospitals and thus suffers from discrepancies in performances and data qualities.

## Introduction

Lung cancer has been the most common cancer in the world for several decades.<sup>1</sup> Estimated new cases of the disease was 1.8 million in 2012 (12.9% of the total), 58% of which occurred in less developed regions. Lung cancer was also the most common cause of death from cancer worldwide, being responsible for nearly one in five (1.59 million in absolute number) of the total.<sup>2</sup> In China, lung cancer incidence shows a slight decreasing trend in the past few years, particularly for males. However, it is still the top first cancer for males and second for females, accounting for 25.2% of all new cancer cases and 29.5% of all cancer deaths in 2012.<sup>3</sup>

Routine inpatient care (RIC) for lung cancer consists of a combination of procedures. Patients with possible lung cancer need a detailed history and physical examination first. Then they should undergo posterior-anterior and lateral chest radiographs as well as CT scans of the chest and abdomen. In order to further confirm and determine stage and histology of the lesion, other diagnostic methods needed include whole-body fluoro-deoxy-glucose positron emission tomography, endoscopic ultrasound, sputum cytology, fine-needle aspiration, bronchoscopy and others. Following diagnosis of lung cancer, the patients proceed with combined-modality therapies depending on stage of the disease and co-morbidity and complications. Historically, surgery provides the best chance for cure for patients whose lung cancers are limited to the hemithorax and can be totally encompassed by excision.<sup>4 5</sup> And surgery has been generally used in combination with external-beam radiotherapy for control of the primary tumor and regional lymphatics.<sup>6</sup> In addition, chemotherapy has also been advocated as an integral part of combined modality approaches to earlier stages of disease.<sup>7 8</sup> For unselected advanced none-small cell lung cancer, platinum-based combinations have become the standard of care; while cisplatin- or carboplatin-based doublets are standard for patients with stage IV disease.<sup>9 10</sup> More recently, EGFR tyrosine kinase inhibitors have been introduced in second- and third-line treatment of advanced disease and in first-line treatment for selected patients.<sup>11</sup>

Given the complex procedures, ensuring quality RIC for lung cancer patients has been most challenging and guidelines are widely used in addressing this challenge. Numerous

1  
2  
3 studies have documented positive relations between compliance with guidelines and  
4 patient outcomes.<sup>12 13</sup> However, researchers have also raised concerns about guidelines.  
5 One of such concerns refers to lack of adequate consideration of costs. Most clinical  
6 procedures not only affect disease outcomes but also incur considerable costs.<sup>14 15</sup> Yet  
7 guidelines are based on trials focused primarily on effectiveness (e.g., survival) with little  
8 attention being paid to economic consequences.<sup>16</sup> Another concern relates to  
9 incompatible population between clinical trials and RIC. Clinical trials on which  
10 guidelines are based use highly selected populations; while RIC serves a general lung  
11 cancer population with different age, performance status and comorbidities.<sup>17 18</sup> A third  
12 concern revolves uncertain interactions between procedures. Although most individual  
13 guideline recommended procedures (GRPs) have established evidences, they are not used  
14 in isolation but in conjunction with others forming various clinical combinations. Efforts  
15 systematically assessing and comparing these combinations are scarce.<sup>19-22</sup> A fourth  
16 concern originates from varied compliance with guidelines since RIC often deviates  
17 substantially from guidelines.<sup>23 24</sup> The cost-effectiveness of these “substandard” or mixed  
18 combinations of procedures (partly from guidelines, partly from experiences of  
19 individual clinicians) falls far from well-understood.<sup>25</sup> These all points to a clear need for  
20 evaluating RIC even though guidelines are widely available.  
21  
22  
23  
24  
25  
26

27 All the above mentioned concerns surrounding cancer care are most pertinent to China.  
28 First, China has a unique “dual” medical care system in which patients often receive  
29 western medicine and traditional Chinese medicine simultaneously or in turn.<sup>26</sup> Second,  
30 China lacks coordinated referral and follow up mechanisms and cancer patients often  
31 moves freely from one hospital to another for different rounds of inpatient care.<sup>27</sup> This  
32 makes it hard for clinicians in leveraging different inpatient care episodes at different  
33 time points and hospitals into continuous and synergetic service. Third, China has strong  
34 socio-cultural norms and financial incentives that hinder cost control and guideline  
35 compliance.<sup>28</sup>  
36  
37  
38  
39  
40

## 41 **Study aims**

42  
43 This study aims at identifying pathways of RIC procedures for lung cancer patients from  
44 rural Anhui, China and examining determinants of the pathways and their links to cost-  
45 effectiveness. Specific questions to be addressed include: a) what combinations of  
46 diagnosis and treatment procedures (or pathways for short) an individual patient may  
47 experience during all his/her hospitalization episodes due to lung cancer-related problems;  
48 b) what are the most and least frequent pathways; c) what determines the flow among  
49 these pathways; d) how cost-effective is each of the pathways; and e) what factors are  
50 associated with the cost-effectiveness.  
51  
52  
53

54 The above “pathways” of inpatient care means combinations of diagnosis and treatment  
55 procedures an individual patient may experience during all his/her hospitalization  
56  
57  
58  
59



1  
2  
3 episodes due to lung cancer-related problems. Suppose a lung cancer patient experienced  
4 6 times/rounds of hospitalized care and during each of these hospitalization episodes, the  
5 patient underwent several diagnosis and treatment procedures. Putting together, all these  
6 procedures form the “pathway” of this particular patient.  
7  
8

## 9 **Methodology**

### 10 **Identification of procedures**

11  
12 The study uses a self-designed data extraction form in identifying major clinical  
13 procedures described in any RIC record under concern. The form lists all major RIC  
14 procedures under two main domains, i.e., diagnostic procedures (e.g., chest X-ray, chest  
15 CT, neck ultrasonography; Part D of supplementary file 1) and treatment procedures (e.g.,  
16 surgical therapy, chemotherapy, psycho-behavioral intervention; Part E of supplementary  
17 file 1).  
18  
19  
20  
21

### 22 **Estimation of costs**

23 The study estimates overall and categorical costs (direct costs only) for each of the RIC  
24 procedures (e.g., lung function examination, computed tomography, white blood cell  
25 count) identified above using micro-costing techniques.<sup>29 30</sup> Taking the example of lung  
26 function examination, categorical costs include costs on personnel, equipment, materials,  
27 regents and others need in completing the examination; while overall cost of the  
28 procedure equals the sum of all these categorical costs. In addition, the study also  
29 calculates overall cost on individual inpatient by adding up the overall costs on all the  
30 clinical procedures he/she has received.  
31  
32  
33  
34

### 35 **Measurement of effectiveness**

36 The study uses both proximal variables of outcome (PV) and ultimate outcome (UO)  
37 measures of effectiveness of RIC procedures. The UO indicators derive from a follow up  
38 survey about 2 years and half after the first hospitalization and include survival,  
39 progression-free survival (PFS), quality of life, and quality adjusted life years (QALYs).  
40 Here, quality of life is assessed using the widely recognized EQ-5D instrument.<sup>31</sup>  
41  
42  
43

44 The PV measures come from RIC records and include Eastern Cooperative Oncology  
45 Group (ECOG), Karnofsky performance status (KPS) and compiled scores of: a)  
46 symptoms (e.g., chronic cough, chest pain, wasting syndrome); b) lung functions (e.g.,  
47 forced vital capacity, forced one second expiratory volume), c) image findings (e.g.,  
48 number of nodules identified in the lung, size of the largest nodules, presence of pleura  
49 or pericardial effusion). Each of these domain specific PV scores equals weighted sum of  
50 all sub-indicators within the domain. For example, the compiled score of “lung functions”  
51 equals the sum of weighted values of forced vital capacity, forced one second expiratory  
52 volume etc. Here the weights come from the coefficients of multivariate regression  
53 modeling using an UO indicator (e.g., survival) as the dependent variable; while forced  
54  
55  
56  
57  
58  
59  
60

vital capacity, forced one second expiratory volume etc. as the independent variables; and stage of disease, age, gender and others as the confounding variables.

### Calculation of cost-effectiveness

The study adopts cost-effectiveness ratios (CERs) and relative cost-effectiveness ratio (RCERs) as the main indicators for measuring cost-effectiveness. Here RCER is defined by the difference in cost between two selected sets of RIC procedures, divided by the difference in their effect. More specifically,  $RCER = (C_{r+x} - C_r) / (E_{r+x} - E_r)$ , where  $C_r$  and  $E_r$  is the cost and effect in the reference group and  $C_{r+x}$  and  $E_{r+x}$ , the cost and effect in the group who have underwent all the procedures in the reference group plus x, a specific procedure under concern.<sup>32</sup> Suppose, x represents a commonly used traditional Chinese medicine (TCM) which incurs 100 dollars; while r, a typical combination of diagnosis and treatment procedures without the TCM. The combination costs 1000 dollars and the survival time of patients who have adopted this combination is 1.5 years on average; while the same figure for patients who have used the combination plus the TCM is 1.51. Then the  $C_{r+x} = 1000 + 100 = 1100$  dollars and the ICER of the TCM =  $(1100-1000)/(1.51-1.5)=10000$  dollars.

### Identification of influencing factors

The study also extracts, from RIC records, data about patient factors commonly believed to be linked with disease progression, treatment response and outcomes and utilization of RIC procedures. These include: a) socio-demographics (e.g., age, gender, body height and weight, education, employment, marital status, medical insurance); b) risk behaviors and histories (e.g., smoking, alcohol drinking, history of cancer among family members); c) historical and biological test findings (e.g., value of ALK, KRAS, EGFR, PDL1, CEA, CA125, proGRP); d) comorbidities and complications (e.g., presence of superior vena cava syndrome, brain metastases) and stage of disease. Here, disease staging uses TNM system and this staging will be treated as the most important factor throughout the data analysis especially in its effects on the flow of different pathways and their cost-effectiveness.

### Selection of participants

The study is implemented in Anhui, an inland province located in middle and east China. It has a population of 61.4 million and its per capita GDP and income rank in the middle (14th) among all provinces in the nation.<sup>33 34</sup> The social, cultural and economic background of Anhui is representative of over 80% of the whole population in China.<sup>33 34</sup> The province has 68 rural counties and each of them divides into 10 to 20 townships. Selection of participating counties, townships, patients and RIC case records uses a clustered random sampling which proceeds in 5 steps. Step 1 classifies all the counties in Anhui into southern, northern and middle areas. Step 2 randomly selects 3 counties from each of these areas (12 counties in total). Step 3 randomly draws 4 townships from each of the counties selected (48 townships in total). Step 4 searches the provincial

1  
2  
3 reimbursement database of the New Rural Cooperative Medical System (NRCMS) and  
4 identifies all the patients within the selected townships who had been first diagnosed with  
5 primary lung cancer during July 1, 2014 and June 30, 2015. Step 5 searches the database  
6 again for all episodes of hospitalization due to the lung cancer for the patients identified  
7 in step 4. NRCMS covers 98% of the rural residents and the estimated number of patients  
8 and admission episodes is about 5,000 and 25,000 respectively.  
9  
10

11 The above sample size was determined by our study purpose of building multivariate  
12 models of factors affecting the cost-effectiveness of specific routine inpatient care (RIC)  
13 pathways. Lung cancer patients generally receive 4 to 6 rounds of inpatient care. Given  
14 the various diagnostic and treatment procedures available, there are hundreds of potential  
15 RIC pathways (combinations of diagnosis and treatment procedures from the first to the  
16 last round of RIC). We plan to group these pathways into manageable (around 20)  
17 categories depending on the resultant distribution of the actual pathways and we aim to  
18 enter 20-30 factors into the cost-effectiveness model for each of these categorical  
19 pathways. Based on these pre-conditions and that the sample size of a multi-variable  
20 model should generally be 10 times the number of independent variables, we need 250  
21 patients for each pathway. This translates into 5000 patients in total.  
22  
23  
24  
25  
26

### 27 **Data collection**

28 The study obtains data through follow-up survey and data extraction. The follow-up  
29 survey applies to all the lung cancer patients identified above. It solicits information  
30 about the patient's: a) disease progression (i.e., died, alive with or without progression);  
31 b) if died, date of death; c) additional admissions due to the lung cancer not included in  
32 the above mentioned NRCMS database. The survey uses a short structured questionnaire  
33 (supplementary file 2). Administration of the questionnaire starts with a telephone  
34 interview (of the patient under concern or his/her close relatives for up to 5 time attempts)  
35 followed by a face-to-face interview (of the same respondents for up to 2 attempts) if the  
36 telephone contacts failed. The recruitment strives to reach over 85% rate of participation.  
37 And the researchers are trained to keep detailed record of reasons they lose some of the  
38 patients so as to allow for assessing potential biases. The data extraction applies to  
39 records of all the hospital admission episodes identified via the NRCMS database and the  
40 follow up survey. It uses a structured form (supplementary file 1) and extracts data about  
41 the clinical procedures, costs, effectiveness and influencing factors described above. Two  
42 experienced clinicians on care of lung cancer perform the data extraction. They visit (on  
43 one-by-one base) all the relevant hospitals, ask for permission to examine the full records  
44 and fill the worksheet independently first followed by discussions, if applicable, to solve  
45 discrepancies.  
46  
47  
48  
49  
50  
51  
52

### 53 **Data analysis**

54 The data collected above allow a variety of descriptive and multivariate analysis  
55 centering on the effectiveness, costs and cost-effectiveness of RIC. The effectiveness  
56  
57  
58  
59  
60

1  
2  
3 analysis comprises all the UO indicators mentioned above including progression free  
4 survival, overall survival, quality of life and DALYs. For each of these UO indicators,  
5 the analysis will produce: a) estimation of average rates or values with 95% confidence  
6 intervals at different time points after first diagnosis by disease stage, PV indicators, RIC  
7 pathways, non-hospital care categories, age range etc.; b) multivariate regression models  
8 using similar variables as independent variables; and c) path models using as disease  
9 stage, RIC pathways, non-hospital care categories, age range etc. as exogenous, complied  
10 PV indices as direct endogenous, and individual PV indicators as indirect endogenous  
11 variables (Figure 1a). Area under ROC (receiver operating characteristic) curve will be  
12 calculated for assessing the predictability of models using binary classifier as the  
13 dependent variable (e.g., models of progression free survival, overall survival).  
14  
15  
16  
17

18 The cost analysis explores mainly: a) overall and categorical costs on different rounds of  
19 hospitalization by socio-demographic and selected clinical conditions (Figure 2); b)  
20 scatter plot of RIC procedures using the occurrence rate and unit cost of individual  
21 procedures as the coordinates; c) multivariate regression models of overall and selected  
22 categorical costs using disease stage, PV indicators, RIC pathways, non-hospital care  
23 categories, age range etc. as independent variables; and d) Markov models of mean cost  
24 for managing lung cancer patients (Figure 1b).  
25  
26  
27

28 The cost-effectiveness analysis focuses primarily on constructing a pathway tree to help  
29 identify the most and the least cost-effective pathways and estimate expected overall and  
30 pathway specific cost, effectiveness and cost-effectiveness ratios. The tree consists of  
31 different branches of combinations of RIC procedures starting from the first to the last  
32 episode of inpatient care labeled with estimated cost, effectiveness and cost-effectiveness  
33 ratios (CERs) (Figure 3). Relevance of the pathway tree is tested by means of, for  
34 instance, varying the percentage of patient flowing among the different pathways or the  
35 cost of major diagnostic and treatment procedures consisting the braches and then  
36 examine changes in the ranking of most or least cost-effective pathways. The analysis  
37 also pays particular attention to identifying as many as comparable pairs of RIC  
38 pathways as possible and calculating RCERs accordingly in a hope to uncover potential  
39 pathways with practice, policy and research implications.  
40  
41  
42  
43  
44

45 The pathway tree construction will use TreeAge<sup>35</sup>; while the descriptive and multi-  
46 variate model analysis, SPSS 16. Cases with missing data about a specific item will be  
47 excluded from the analysis involving the item and where applicable, the statistical null  
48 hypothesis is be rejected at the significance level of  $\alpha = 0.05$ .  
49  
50

### 51 **Ethics and dissemination**

52 The study involves retrieving RIC records and recruiting patients or their relatives. So it  
53 adheres to rigorous human subject protection principles. The study protocol had been  
54 reviewed and approved by the Biomedical Ethics Committee of Anhui Medical  
55  
56  
57  
58  
59

1  
2  
3 University (reference number: 20170312). Participation of hospitals, patients and their  
4 relatives are voluntary and written informed consent is required for all participants.  
5 Findings from the study will be disseminated through conventional academic routes such  
6 as peer-reviewed publications and presentations and regional, national and international  
7 conferences.  
8  
9

## 10 **Discussion**

11  
12  
13 The study would share the experience of lung cancer care from the rural Chinese  
14 perspective. It is an important sharing of knowledge on population-based lung cancer  
15 care, especially since most economic evidence comes from Europe and North America.  
16 As mentioned earlier in introduction, China has a unique clinical care system. In China,  
17 traditional Chinese medicine is used to complement or replace western medicine. This  
18 results in quite different pathways of lung cancer care that have seldom been well  
19 explored in published literatures. China has a long history of almost no charges being  
20 made for clinical consultations and most patients are used to paying only for medicines,  
21 laboratory tests and equipment-based examinations. This forms a perverse financial  
22 incentive for clinicians for ordering more sophisticated examinations and tests and for  
23 over prescribing. China's lack of referral and follow up mechanisms also merits  
24 particular attention. As an individual patient changes from one hospital (say for the first  
25 round of treatment) to another (for the second round treatment), he/she may receive  
26 different treatment regimens. Discontinued treatment and follow up may make it hard for  
27 clinicians to base their treatment decisions on observed effects.  
28  
29  
30  
31  
32

33  
34 Perhaps the most noteworthy findings of the current study may be the description of the  
35 pathways of RIC procedures and their links with cost-effectiveness (Figure 2). These  
36 pathways will provide easily understandable means for estimating and identifying,  
37 among others, the following: a) which pathways or combinations of procedures happen  
38 most or least in routine practice during different rounds of hospitalization for inpatients  
39 suffering from lung cancer in rural China; b) which pathways (from the first to last round  
40 of hospitalization) incur the highest or lowest direct costs; c) which pathways result in  
41 the best or worst patient outcome in terms of different PV and UO measures; d) which  
42 pathways are most or least cost-effective in terms of e.g., per unit cost gains in PFS, KPS,  
43 symptoms, lung functions, image findings, biological test findings, complications and  
44 comorbidities. These have important implications for clinical decision-making as well as  
45 policy-making.  
46  
47  
48  
49

50  
51 Another point worth mentioning in particular refers to the links between the domain  
52 specific proximate outcome (PV) indices to key ultimate outcome (UO) indicators (e.g.,  
53 survival) generated via a large scale (involving 5000 lung cancer patients) retrospective  
54 cohort study. They provide useful references for clinicians on care of lung cancer patients  
55 in selecting appropriate procedures to achieve optimal collective contributions to UO.<sup>36</sup>  
56  
57  
58  
59

1  
2  
3 At present, although PV indicators are observed routinely, they are presented to  
4 clinicians as individual indicators rather than compiled indices. And given the large  
5 number of PV indicators involved and the complex relations between RIC procedures  
6 and PV indicators and then UO indicators, it is difficult for practicing clinicians to make  
7 balanced decisions upon their personal experiences.<sup>37</sup>  
8  
9

10 In addition, this study addresses RIC for lung cancer at hospitals in China from a range  
11 of meaningful perspectives. The study reinforces the concepts introduced in the landmark  
12 studies of Fisher et al and Wennberg et al, which convincingly demonstrated that high  
13 quality was not necessarily associated with high cost.<sup>38</sup> Describing inpatient lung cancer  
14 care in a view that its value is directly proportional to outcomes and inversely  
15 proportional to costs helps in guiding quality improvement by either better outcomes  
16 and/or lower costs.<sup>39</sup> The study calculates and compares the collective cost-effectiveness  
17 of different RIC pathways as a whole and thus informs coordinated inpatient care  
18 episodes and procedures at different time points and hospitals. The study enables RCERs  
19 estimation for specific guideline recommended procedures (GRPs) using various  
20 combinations of real and uncontrollable RIC procedures as the reference and thus  
21 enhances understanding and application of GRPs established through well-controlled  
22 studies in routine practice contexts.  
23  
24  
25  
26  
27

28 The study also has limitations. The first limit concerns data reliability. Although the  
29 majority of data will be extracted from RIC records kept at hospitals, the study uses self-  
30 reported data about quality of life and inpatient, outpatient and home care. Self-reports  
31 are prone to various biases including recall issues particularly among the elderly, over or  
32 under reporting by the respondents for reasons like perceived expectations from the  
33 researchers or for fearing of potential worries or distress. These biases may be reduced to  
34 a minimum in our study by means of interviewer training, use of chorological recall and  
35 probing techniques, and cross-checks of findings from patient interviews, health  
36 insurance database and hospital records. More importantly, the study uses EQ-5D in  
37 assessing quality of life. It has already been tested with adequate reliability both  
38 internationally and in China. Regarding non-hospitalized care, the study asks only simple  
39 questions about what kind of care the patients have experienced and when and for how  
40 long. These questions are relatively memorable and easily to answer. The second limit  
41 relates to selective study content. The study considers only inpatient care; while patients  
42 may use various self-treatment and outpatient treatment in addition to inpatient care.<sup>40 41</sup>  
43 And inpatient and non-inpatient treatment may substitute each other to some extent.  
44 These may result in under-estimation of the effectiveness of RIC procedures. Fortunately,  
45 this under-estimation may be offset to a large extent by treating non-hospital care as  
46 confounders and the study data to be collected allow this exercise. Third, the study  
47 considers only direct costs rather than full costs taking both direct and indirect costs into  
48 consideration. In addition, different hospitals use different equipment, reagents and  
49 medicines. Their quality of case records may also vary substantially. These raise  
50  
51  
52  
53  
54  
55  
56  
57  
58  
59  
60

1  
2  
3 compatibility concerns in pooling data from different hospitals together and performing  
4 aggregate analysis. Finally, readers may raise concerns about representativeness of  
5 inpatients to the large cancer patients. Hospitalization rates documented from other  
6 countries vary greatly;<sup>42</sup> while similar data from China are scarce. Our estimation, using  
7 the dataset of the lasted province-wide Household Health Survey of Anhui, of the  
8 proportion of lung cancer patients who had been admitted to hospitals at least once was  
9 as high as 89%.<sup>43</sup>  
10  
11

## 12 13 **Competing interests**

14  
15  
16 The authors declare no competing interests.  
17

## 18 **Authors' contributions**

19  
20  
21 XS and MD contributed equally in conceiving this project, facilitating protocol and  
22 instrument development, and drafting this manuscript. RF, ML, PZ and TJ are kore  
23 researchers for cost estimation, record extraction, follow up survey and data analysis  
24 respectively. DW provided expertise for overall design of the study, and revised and  
25 finalized the manuscript. All authors have read and approved the final submission.  
26  
27

## 28 **Acknowledgements**

29  
30  
31 Development of the primitive protocol was supported by the Natural Science Foundation  
32 of China (grant number: 81172201). Refinement and implementation of the protocol is  
33 lead and supported by Collaboration Center for Cancer Control of Anhui Medical  
34 University, Anhui and Luan Center for Diseases Control and Prevention.  
35  
36  
37

## 38 **References**

- 39  
40  
41 1. McErlean A, Ginsberg MS. Epidemiology of lung cancer. *Semin Roentgenol* 2011;46  
42 (3):173-7.  
43 2. World Health Organization. GLOBOCAN 2012: Estimated Cancer Incidence,  
44 Mortality and Prevalence Worldwide in 2012. <http://globocan.iarc.fr/Default.aspx>.  
45 3. Kong J, Xu F, He M, Chen K, et al. The incidence of lung cancer by histological type:  
46 a population-based study in Tianjin, China during 1981-2005. *Respirology*  
47 2014;19(8):1222-8.  
48 4. Woodard GA, Jablons DM. The Latest in Surgical Management of Stage IIIA Non-  
49 Small Cell Lung Cancer: Video-Assisted Thoracic Surgery and Tumor Molecular  
50 Profiling. *Am Soc Clin Oncol Educ Book* 2015;35:e435-41.  
51 5. Grunenwald DH. The role of surgery in non-small-cell lung cancers. *Ann Oncol*  
52 2005;16 Suppl 2:ii220-2.  
53 6. Ricardi U, Badellino S, Filippi AR. Stereotactic radiotherapy for early stage non-small  
54 cell lung cancer. *Radiat Oncol J.* 2015;33(2):57-65.  
55  
56  
57  
58  
59

7. Mangal S, Gao W, Li T1, Zhou QT. Pulmonary delivery of nanoparticle chemotherapy for the treatment of lung cancers: challenges and opportunities. *Acta Pharmacol Sin*. 2017. doi: 10.1038/aps.2017.34.
8. Khan I, Morris S, Hackshaw A, et al. Cost-effectiveness of first-line erlotinib in patients with advanced non-small-cell lung cancer unsuitable for chemotherapy. *BMJ Open* 2015; 5(7):e006733.
9. Garon EB, Ciuleanu TE, Arrieta O, et al. Ramucirumab plus docetaxel versus placebo plus docetaxel for second-line treatment of stage IV non-small-cell lung cancer after disease progression on platinum-based therapy (REVEL): a multicentre, double-blind, randomised phase 3 trial. *Lancet* 2014;384(9944):665-73.
10. Spigel DR, Luft A, Depenbrock H, et al. An Open-Label, Randomized, Controlled Phase II Study of Paclitaxel-Carboplatin Chemotherapy With Necitumumab Versus Paclitaxel-Carboplatin Alone in First-Line Treatment of Patients With Stage IV Squamous Non-Small-Cell Lung Cancer. *Clin Lung Cancer* 2017; pii: S1525-7304(17)30045-1.
11. Stinchcombe TE. The Use of EGFR Tyrosine Kinase Inhibitors in EGFR Wild-Type Non-Small-Cell Lung Cancer. *Curr Treat Options Oncol* 2016; 17(4):18.
12. Ahmed HZ, Liu Y, O'Connell K, et al. Guideline-concordant Care Improves Overall Survival for Locally Advanced Non-Small-cell Lung Carcinoma Patients: A National Cancer Database Analysis. *Clin Lung Cancer* 2017; pii: S1525-7304(17)30114-6.
13. Nadpara P, Madhavan SS, Tworek C. Guideline-concordant timely lung cancer care and prognosis among elderly patients in the United States: A population-based study. *Cancer Epidemiol*; 39(6):1136-44.
14. Hinde S, McKenna C, Whyte S, et al. Modelling the cost-effectiveness of public awareness campaigns for the early detection of non-small-cell lung cancer. *Br J Cancer* 2015; 113(1):135-41.
15. Kumar G, Woods B, Hess LM, et al. Cost-effectiveness of first-line induction and maintenance treatment sequences in non-squamous non-small cell lung cancer (NSCLC) in the U.S. *Lung Cancer* 2015. pii: S0169-5002(15)00281-0.
16. Warren JL, Harlan LC, Trimble EL, et al. Trends in the receipt of guideline care and survival for women with ovarian cancer: A population-based study. *Gynecol Oncol* 2017;145(3):486-492.
17. Jennens RR, Giles GG, Fox RM. Increasing underrepresentation of elderly patients with advanced colorectal or non-small-cell lung cancer in chemotherapy trials. *Int Med J* 2006;36: 216e220.
18. Murthy VH, Krumholtz HM, Gross CP. Participation in cancer clinical trials; race-, sex-, and age-based disparities. *JAMA* 2004;22(291): 2720-2726.
19. Tong Y, Huang C, Zhang J. A novel EGFR-TKI inhibitor (cAMP-H3BO3 complex) combined with thermal therapy is a promising strategy to improve lung cancer treatment outcomes. *Oncotarget*. Published Online First: 04 May 2017.doi: 10.18632/oncotarget.17628.
20. National Health and Family Planning Commission of China. Guideline for Chinese primary lung cancer diagnosis and treatment (2015 edition). *Chinese Journal of Oncology* 2015.37(1):67-78.
21. Xing Wang, Shi Yan, Yaqi Wang, et al. Surgical Quality Surveillance and Sustaining Improvement of Lung Cancer Surgery Based On Standard Operation Procedure(SOP) : Experience of Single Surgical Team. *Chinese Journal of Lung*



- Cancer*; 20(4): 253-258.
22. Jackman DM, Zhang Y, Dalby C, et al. Cost and Survival Analysis Before and After Implementation of Dana-Farber Clinical Pathways for Patients With Stage IV Non-Small-Cell Lung Cancer. *J Oncol Pract* 2017;13(4):e346-e352.
  23. Okita A, Yamashita M, Abe K, et al. Variance analysis of a clinical pathway of video-assisted single lobectomy for lung cancer. *Surg Today* 2009;39(2):104-9.
  24. Duggan KJ, Descallar J, Vinod SK. Application of Guideline Recommended Treatment in Routine Clinical Practice: A Population-based Study of Stage I-IIIB Non-small Cell Lung Cancer. *Clin Oncol (R Coll Radiol)* 2016;28(10):639-47.
  25. Heins MJ, de Jong JD, Spronk I, et al. Adherence to cancer treatment guidelines: influence of general and cancer-specific guideline characteristics. *Eur J Public Health* 2016; pii: ckw234. doi: 10.1093/eurpub/ckw234.
  26. Yang S, Cui M, Li HY, et al. Meta-analysis of the effectiveness of Chinese and Western integrative medicine on medium and advanced lung cancer. *Chin J Integr Med* 2012;18(11):862-7.
  27. XX L, YW Chen, KS Bi. Resolution of Two- way Recerral Problem in China by Studying British National Health Service System. *Chinese General Practice* 2013; 31(16):2926-29.
  28. Y Sun, J Wu, SB Xie, et al. Evaluation of the medical staff clinical pathway adherence: Based on comparison of before and after provider payment reform in Henan Province. *Chinese Journal of Health Policy* 2013;6(5):37-43.
  29. Henry SG, Ness RM, Stiles RA, Shintani AK, Dittus RS. A cost analysis of colonoscopy using microcosting and time-and-motion techniques. *J Gen Intern Med* 2007, 22(10):1415-21.
  30. Cressman S, Lam S, Tammemagi MC, et al. Resource utilization and costs during the initial years of lung cancer screening with computed tomography in Canada. *J Thorac Oncol* 2014, 9(10):1449-58.
  31. Khan I, Morris S, Pashayan N, et al. Comparing the mapping between EQ-5D-5L, EQ-5D-3L and the EORTC-QLQ-C30 in non-small cell lung cancer patients. *Health Qual Life Outcomes* 2016, 14:60.
  32. SN York. Incremental Cost-Effectiveness Ratio. *Handbook of Disease Burdens and Quality of Life Measures* 2010: 4235-4235.
  33. National Bureau of Statistics of China. China Statistical Yearbook 2016. <http://www.stats.gov.cn/tjsj/ndsj/2016/indexch.htm> (accessed 1 July 2017).
  34. Statistics Bureau of Anhui Province. Statistical yearbook of Anhui Province in 2016. [http://www.ahtjj.gov.cn/tjj/web/tjnj\\_view.jsp?strColId=13787135717978521&\\_index=1#](http://www.ahtjj.gov.cn/tjj/web/tjnj_view.jsp?strColId=13787135717978521&_index=1#) (accessed 1 July 2017).
  35. Treeage: Hollman C, Paulden M, Pechlivanoglou P, et al. A Comparison of Four Software Programs for Implementing Decision Analytic Cost-Effectiveness Models. *Pharmacoeconomics* 2017. doi: 10.1007/s40273-017-0510-8.
  36. Darling G, Malthaner R, Dickie J, et al. Quality indicators for non-small cell lung cancer operations with use of a modified Delphi consensus process. *Ann Thorac Surg* 2014;98(1):183-90.
  37. Fisher A, Manicavasagar V, Sharpe L, et al. A Qualitative Exploration of Clinician Views and Experiences of Treatment Decision-Making in Bipolar II Disorder. *Community Ment Health J*. Published Online First: 19 Jan 2017. doi: 10.1007/s10597-016-0077-4.

- 1  
2  
3 38. Wennberg JE, Fisher ES. Finding high quality, efficient providers for value  
4 purchasing: cohort methods better than methods based on events. Finding high  
5 quality, efficient providers for value purchasing: cohort methods better than methods  
6 based on events. *Med Care* 2002,40(10):853-5.  
7  
8 39. Chen LW, Wilson FA, Gregg A, et al. Measuring the Cost and Value of Quality  
9 Improvement Initiatives for Local Health Departments. *J Public Health Manag Pract*.  
10 Published Online First: 1 Mar 2017. doi: 10.1097/PHH.0000000000000552.  
11  
12 40. O' Regan P, Hegarty J. The importance of self-care for fatigue amongst patients  
13 undergoing chemotherapy for primary cancer. *Eur J Oncol Nurs* 2017;28:47-55.  
14  
15 41. Dionne-Odom JN, Demark-Wahnefried W, Taylor RA, et al. The self-care practices  
16 of family caregivers of persons with poor prognosis cancer: differences by varying  
17 levels of caregiver well-being and preparedness. *Support Care Cancer* 2017;  
18 25(8):2437-2444.  
19  
20 42. Prince RM, Atenafu EG, Krzyzanowska MK. Hospitalizations During Systemic  
21 Therapy for Metastatic Lung Cancer: A Systematic Review of Real World vs Clinical  
22 Trial Outcomes. *JAMA Oncol* 2015, 1(9):1333-9.  
23  
24 43. Zhao T, Cheng J, Chai J, et al. Inpatient care burden due to cancers in Anhui, China:  
25 a cross-sectional household survey. *BMC Public Health* 2016, 16:308.  
26  
27  
28  
29  
30  
31  
32  
33  
34  
35  
36  
37  
38  
39  
40  
41  
42  
43  
44  
45  
46  
47  
48  
49  
50  
51  
52  
53  
54  
55  
56  
57  
58  
59  
60

1  
2  
3 Figure 1 Schematic structure of sample multivariate models to be built  
4

5 Figure 2 Simulated cost by selected socio-demographics and clinical characteristics  
6 (TC=total cost; KRMB=1000 Chinese yuan)  
7

8 Figure 3 Anticipated “procedure-outcome” tree of inpatient lung cancer care (Tx = the  
9 xth round of hospitalization; Cx = the xth combination of clinical procedures; Px =  
10 possibility of using the xth combinations of clinical procedures; Ox = the xth patient  
11 outcome index/indicator)  
12  
13  
14  
15  
16  
17  
18  
19  
20  
21  
22  
23  
24  
25  
26  
27  
28  
29  
30  
31  
32  
33  
34  
35  
36  
37  
38  
39  
40  
41  
42  
43  
44  
45  
46  
47  
48  
49  
50  
51  
52  
53  
54  
55  
56  
57  
58  
59  
60

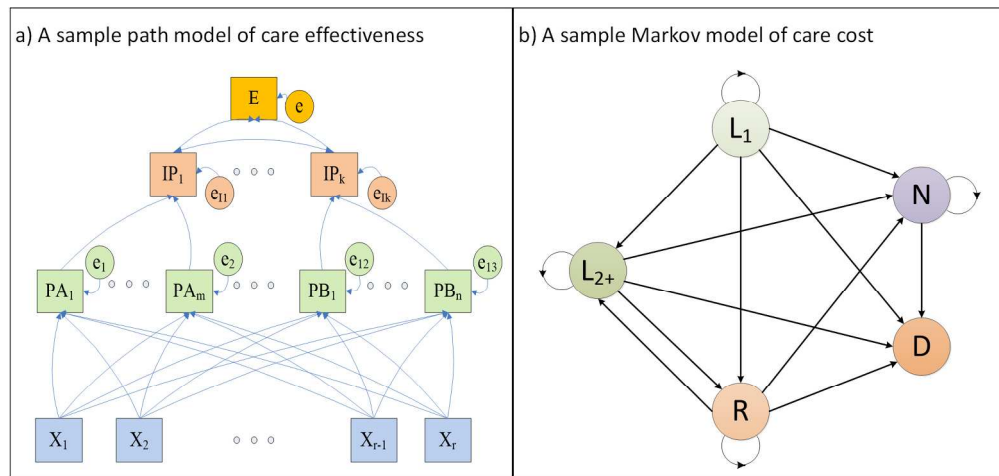

Figure 1 Schematic structure of sample multivariate models to be built/ X=independent variables; PA or PB=domain A or proximate indicators of effectiveness; IP=index of proximate variables; e=systematic error; and E= effectiveness, e.g., overall survival, QALYs; L<sub>1</sub>=first line treatment; L<sub>2+</sub>=second or third line treatment; R=remission; N=no active treatment; D=death.

188x88mm (300 x 300 DPI)

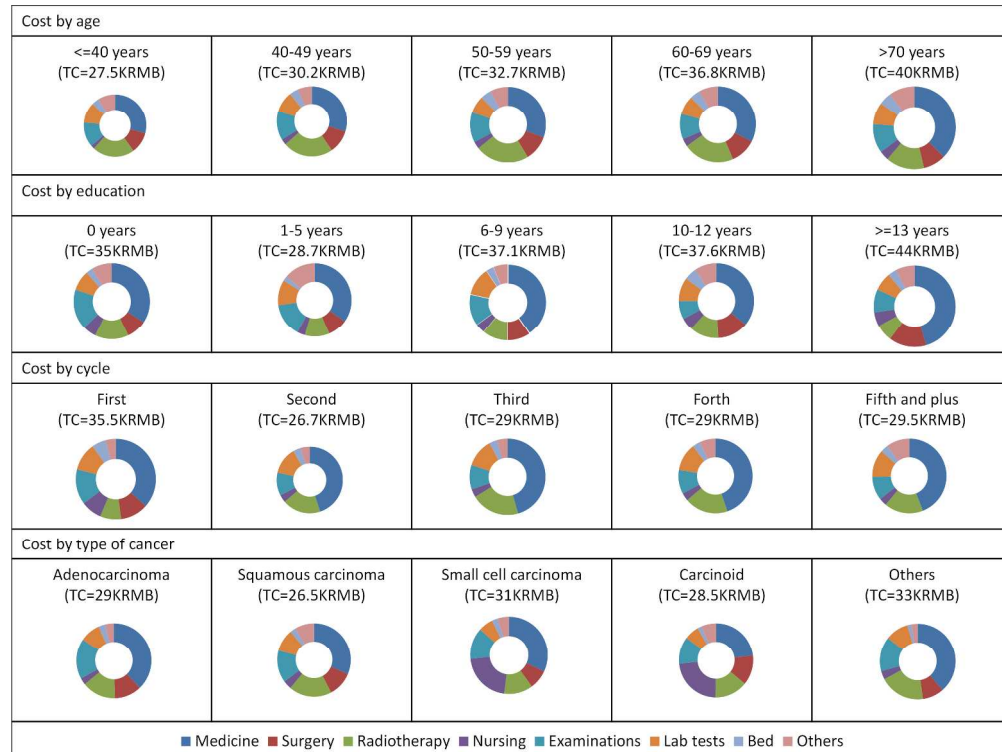

Figure 2 Simulated cost by selected socio-demographics and clinical characteristics (TC=total cost; KRMB=1000 Chinese yuan)

249x187mm (300 x 300 DPI)

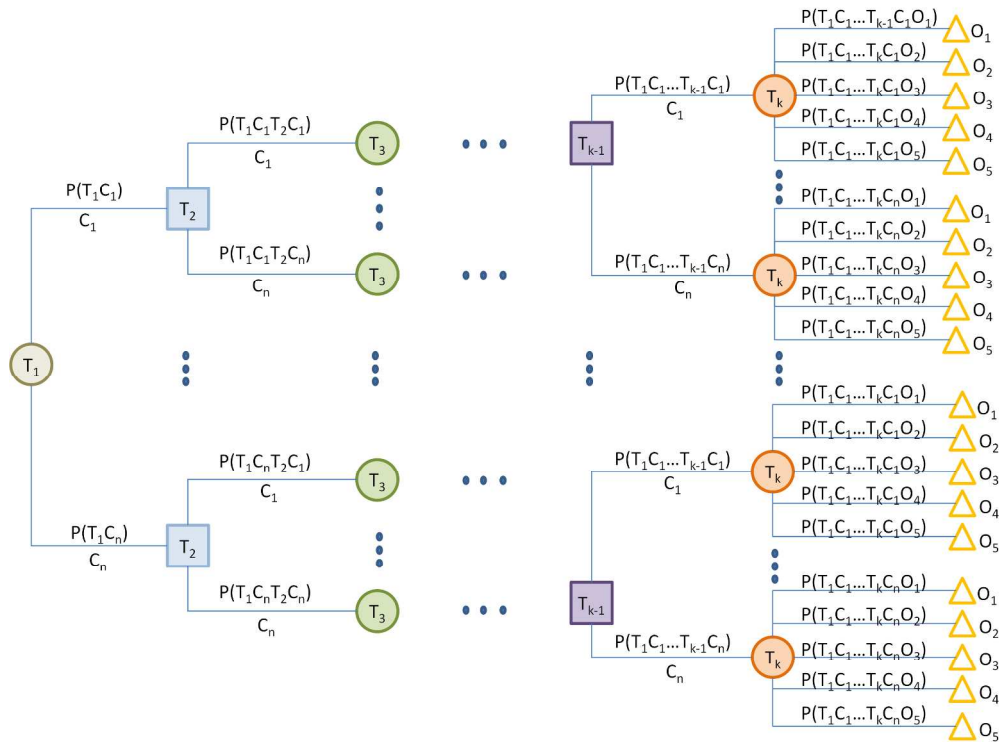

Figure 3 Anticipated "procedure-outcome" tree of inpatient lung cancer care ( $T_x$  = the  $x^{\text{th}}$  round of hospitalization;  $C_x$  = the  $x^{\text{th}}$  combination of clinical procedures;  $P_x$  = possibility of using the  $x^{\text{th}}$  combinations of clinical procedures;  $O_x$  = the  $x^{\text{th}}$  patient outcome index/indicator)

242x183mm (300 x 300 DPI)

## Annex 1 Lung cancer inpatient care data extraction form

Reference Number: |\_|\_|-|\_|\_|\_|\_|\_|\_|\_|\_|

### Part A: Patient's social demographics

1.1 Case record number: |\_|\_|\_|\_|\_|\_|\_|\_|\_|\_|

1.2 Patient identification number: |\_|\_|\_|\_|\_|\_|\_|\_|\_|\_|\_|\_|\_|\_|\_|\_|\_|\_|\_|\_|\_|\_|

1.3 Sex: [1]Male [2]Female

1.4 Birth date (dd-mm-yyyy, first case record only): |\_|\_|-|\_|\_|-|\_|\_|\_|\_|\_|

1.5 Body height (centimeter, first case record only): |\_|\_|\_|\_|

1.6 Body weight (kilogram): |\_|\_|\_|\_|.|\_|

1.7 Education (first case record only):

- |                         |                    |                        |
|-------------------------|--------------------|------------------------|
| [1] No formal education | [2] Primary school | [3] Middle school      |
| [4] High school         | [5] College        | [6] Graduate or higher |
| [7] Not clear           |                    |                        |

1.8 Occupation (first case record only):

- |                              |                       |                   |
|------------------------------|-----------------------|-------------------|
| [1] Staff of public entities | [2] Employee of firms | [3] Self-employed |
| [4] Peasant                  | [5] Un-employed       | [6] Retired       |
| [7] Army member              | [8] Not clear         |                   |

1.9 Marital status:

- |               |             |               |
|---------------|-------------|---------------|
| [1] Unmarried | [2] Married | [3] Divorced  |
| [4] Widowed   | [5] Other   | [6] Not clear |

1.10 Medical insurance:

- [1] Essential medical insurance for urban employees
- [2] Medical insurance for urban citizens
- [3] New rural cooperative medical care systems
- [4] Commercial medical insurance
- [5] Public medical care system
- [6] Out-of-pocket care
- [7] Other
- [8] Not clear

### Part B: Patient's behavior and disease history (first case record only)

2.1 Smoking:

- |                    |                             |                |
|--------------------|-----------------------------|----------------|
| [1] Current smoker | [2] Former smoker           | [3] Non-smoker |
| [4] Smoker         | [9] Not clear (skip to 2.2) |                |

2.1.1 Number of cigarettes smoked per day: |\_|\_|\_|\_|

2.1.2 Number of years smoked: |\_|\_|

2.1.3 Number of years ceased smoking: |\_|\_|

## 2.2 Previous diagnosis of the following respiratory diseases:

- |                    |                              |               |
|--------------------|------------------------------|---------------|
| [1] Tuberculosis   | [2] Chronic bronchitis       | [3] Emphysema |
| [4] Asthma         | [5] Silicosis/pneumoconiosis |               |
| [6] Other(specify) |                              |               |

## 2.3 Previous diagnosis of the following cardio-cerebrovascular/endocrine diseases:

- |                         |                            |                         |
|-------------------------|----------------------------|-------------------------|
| [1] Hypertension        | [2] Coronary heart disease | [3] Cerebral thrombosis |
| [4] Cerebral hemorrhage | [5] Hyperlipemia           | [6] Diabetes            |
| [7] Other(specify)      |                            |                         |

## 2.4 Previous diagnosis of cancer (enter location of cancer, if applicable, e.g., breast cancer, colorectal cancer)

- |     |     |     |
|-----|-----|-----|
| [1] | [2] | [3] |
| [4] | [5] | [6] |
| [7] | [8] | [9] |

(Please add more cells as needed)

## 2.5 Previous diagnosis of cancer among relatives

- | Number | Type of relatives | Location of cancer |
|--------|-------------------|--------------------|
| [1]    |                   |                    |
| [2]    |                   |                    |
| [3]    |                   |                    |

(Please add more rows as needed)

**Part C: Patient's current symptoms/signs**

## 3.1 Respiratory symptoms/signs

- |                      |                         |                         |
|----------------------|-------------------------|-------------------------|
| [1] Chronic coughing | [2] Sputum with blood   | [3] Chest suppression   |
| [4] Chest pain       | [5] Difficult breathing | [6] Repeated bronchitis |
| [7] Hoarseness       | [8] Other (specify)     |                         |
| [9] None             |                         |                         |

## 3.2 Symptoms/signs of metabolism or immunity dysfunction:

- |                     |                              |                 |
|---------------------|------------------------------|-----------------|
| [1] None            | [2] Hippocratic fingers/toes | [3] Amyasthenia |
| [4] Hyponatremia    | [5] Blacken skin folds       |                 |
| [6] Other (specify) |                              |                 |

## 3.3 Symptoms/signs relating to lung cancer metastasis:

- |                     |                       |                     |
|---------------------|-----------------------|---------------------|
| [1] None            | [2] Topical pain      | [3] Headache        |
| [4] Dizzy           | [5] Sudden dyskinesia | [6] Facial swelling |
| [7] Other (specify) |                       |                     |

## 3.4 Cancer-related non-specific symptoms/signs:

- |                         |                         |              |
|-------------------------|-------------------------|--------------|
| [1] None                | [2] Apparent emaciation | [3] Weakness |
| [4] Mild/moderate fever | [5] Other (specify)     |              |

## 3.5 Karnofsky score:

- |                   |
|-------------------|
| [1]  _ _ _ _      |
| [2] Not available |

## 3.6 Body surface examination findings:

- |          |
|----------|
| [1] None |
|----------|







- 1  
2  
3 [1] No abnormalities [2] Neck /supraclavicular lymph nodes  
4 [3] Others (specify)  
5  
6

7 4a.8 Chest ultrasonography

- 8 [1] Not performed (skip to 4a.9)  
9 [2] Performed

10 4a.8.1 Date of performance (dd-mm-yyyy): |\_|\_|-|\_|\_|-|\_|\_|\_|\_|

11 4a.8.2 Diagnosis from chest ultrasonography

- 12 [1] No abnormalities [2] Pleural effusion [3] Pericardial effusion  
13 [4] Others (specify)  
14

15 4a.9 Abdominal ultrasonography

- 16 [1] Not performed (skip to 4a.10)  
17 [2] Performed

18 4a.9.1 Date of performance (dd-mm-yyyy): |\_|\_|-|\_|\_|-|\_|\_|\_|\_|

19 4a.9.2 Diagnosis from abdominal ultrasonography

- 20 [1] No abnormalities [2] Liver metastases [3] Adrenal gland transfer  
21 [4] Peritoneal/retroperitoneal lymphadenopathy  
22 [5] Others (specify)  
23

24 4a.10 Bone scans

- 25 [1] Not performed (skip to 4a.11)  
26 [2] Performed

27 4a.10.1 Date of performance (dd-mm-yyyy): |\_|\_|-|\_|\_|-|\_|\_|\_|\_|

28 4a.10.2 Diagnosis from bone scans

- 29 [1] No abnormalities [2] confirmed metastases [3] Suspected metastases  
30 [4] Others (specify)  
31

32 4a.10.2.1 If [2] or [3], location of metastases

33 4a.11 PET-CT examination

- 34 [1] Not performed (skip to 4b.1)  
35 [2] Performed

36 4a.11.1 Date of performance (dd-mm-yyyy): |\_|\_|-|\_|\_|-|\_|\_|\_|\_|

37 4a.11.2 Diagnosis from PET-CT examination

- 38 [1] No abnormalities [2] Lung nodules/mass(Primary lesion)  
39 [3] Pulmonary metastasis [4] Lymph node metastasis  
40 [5] Adrenal gland transfer [6] Bone transfer  
41 [7] Other site transfer [8] Thoracic / pericardial effusion  
42 [9] Others (specify)  
43

44 4a.11.3.1 If [2], location of lung nodules/mass

45 4a.11.3.1.1 Size of the largest nodules/mass: |\_|\_|.|\_|\*|\_|\_|.|\_|cm

46 4a.11.3.1.2 SUV

47 4a.11.3.1.3 Nature of the nodules/mass identified:

- 48 [1] Affirmative benign [2] Suspected benign [3] Suspected malignant  
49 [4] Affirmative malignant [5] Not clear [6] Others (specify)  
50

51 4a.11.3.2 If [3], location of pulmonary metastasis

52 4a.11.3.2.1 SUV  
53  
54  
55  
56  
57  
58  
59  
60

- 1  
2  
3 4a.11.3.3 If [4], location of lymph node metastasis  
4 4a.11.3.3.1SUV  
5  
6 4a.11.3.4 If [5], location of adrenal gland metastasis  
7 4a.11.3.4.1SUV  
8  
9 4a.11.3.5 If [6], location of bone metastases  
10 4a.11.3.5.1 SUV  
11 4a.11.3.6 If [7], location of other metastases  
12 4a.11.3.6.1 SUV  
13  
14

## 15 **b) Endoscopic examinations**

### 16 4b.1 Fiberoptic bronchoscopy

17 [1] Not performed (skip to 4b.2)

18 [2] Performed

19 4b.1.1 Date of performance (dd-mm-yyyy): |\_|\_|-|\_|\_|-|\_|\_|\_|\_|

20 4b.1.2 Diagnosis from fiberoptic bronchoscopy

21 [1] No abnormalities [2] Tumor

22 [3] Others (specify)

23 [4] Not clear

### 24 4b.2 Lavage cytology/brushing

25 [1] Not performed (skip to 4b.3)

26 [2] Not clear (skip to 4b.3)

27 [3] Performed

28 4b.2.1 Date of performance (dd-mm-yyyy): |\_|\_|-|\_|\_|-|\_|\_|\_|\_|

### 29 4b.3 Bronchoscopy clamp biopsy

30 [1] Not performed (skip to 4b.4)

31 [2] Not clear (skip to 4b.4)

32 [3] Performed

33 4b.3.1 Date of performance (dd-mm-yyyy): |\_|\_|-|\_|\_|-|\_|\_|\_|\_|

### 34 4b.4 Bronchoscopy aspiration biopsy

35 [1] Not performed (skip to 4c.0)

36 [2] Not clear (skip to 4c.0)

37 [3] Performed

38 4b.4.1 Date of performance (dd-mm-yyyy): |\_|\_|-|\_|\_|-|\_|\_|\_|\_|

39 4b.4.2 Type of bronchoscopy aspiration biopsy

40 [1] Endobroncheal ultrasonography [2] Electromagnetic-guided

41 [3] Transbronchial needle aspiration [4] Not clear

42 [5] Others (specify)

## c) Laboratory/biological tests

4c.0 Date of performance (dd-mm-yyyy): |\_|\_|-|\_|\_|-|\_|\_|\_|\_|

4c.1 CEA

[1] Not performed (skip to 4c.2)

[2] Not clear (skip to 4c.2)

[3] Performed

4c.1.1 Date of performance if different from 4c.0

(dd-mm-yyyy): |\_|\_|-|\_|\_|-|\_|\_|\_|\_|

4c.1.2 Test result (value-unit): \_\_\_\_\_ - \_\_\_\_\_

4c.2 CA125

[1] Not performed (skip to 4c.3)

[2] Not clear (skip to 4c.3)

[3] Performed

4c.2.1 Date of performance if different from 6.0

(dd-mm-yyyy): |\_|\_|-|\_|\_|-|\_|\_|\_|\_|

4c.2.2 Test result (value-unit): \_\_\_\_\_ - \_\_\_\_\_

4c.3 proGRP

[1] Not performed (skip to 4c.4)

[2] Not clear (skip to 4c.4)

[3] Performed

4c.3.1 Date of performance if different from 6.0

(dd-mm-yyyy): |\_|\_|-|\_|\_|-|\_|\_|\_|\_|

4c.3.2 Test result (value-unit): \_\_\_\_\_ - \_\_\_\_\_

4c.4 SCC

[1] Not performed (skip to 4c.5)

[2] Not clear (skip to 4c.5)

[3] Performed

4c.4.1 Date of performance if different from 6.0

(dd-mm-yyyy): |\_|\_|-|\_|\_|-|\_|\_|\_|\_|

4c.4.2 Test result (value-unit): \_\_\_\_\_ - \_\_\_\_\_

4c.5 NSE

[1] Not performed (skip to 4c.6)

[2] Not clear (skip to 4c.6)

[3] Performed

4c.5.1 Date of performance if different from 6.0

(dd-mm-yyyy): |\_|\_|-|\_|\_|-|\_|\_|\_|\_|

4c.5.2 Test result (value-unit): \_\_\_\_\_ - \_\_\_\_\_

4c.6 CYFRA21-1

[1] Not performed (skip to 4c.7)

[2] Not clear (skip to 4c.7)

[3] Performed

4c.6.1 Date of performance if different from 6.0

(dd-mm-yyyy): |\_|\_|-|\_|\_|-|\_|\_|\_|\_|

4c.6.2 Test result (value-unit): \_\_\_\_\_ - \_\_\_\_\_

#### 4c.7 WBC

[1] Not performed (skip to 4c.8)

[2] Not clear (skip to 4c.8)

[3] Performed

4c.7.1 Date of performance if different from 6.0

(dd-mm-yyyy): |\_|\_|-|\_|\_|-|\_|\_|\_|\_|

4c.7.2 Test result (value-unit): \_\_\_\_\_ - \_\_\_\_\_

#### 4c.8 PLT

[1] Not performed (skip to 4c.9)

[2] Not clear (skip to 4c.9)

[3] Performed

4c.8.1 Date of performance if different from 6.0

(dd-mm-yyyy): |\_|\_|-|\_|\_|-|\_|\_|\_|\_|

4c.8.2 Test result (value-unit): \_\_\_\_\_ - \_\_\_\_\_

#### 4c.9 Hb

[1] Not performed (skip to 4c.10)

[2] Not clear (skip to 4c.10)

[3] Performed

4c.9.1 Date of performance if different from 6.0

(dd-mm-yyyy): |\_|\_|-|\_|\_|-|\_|\_|\_|\_|

4c.9.2 Test result (value-unit): \_\_\_\_\_ - \_\_\_\_\_

#### 4c.10 ALB

[1] Not performed (skip to 4c.11)

[2] Not clear (skip to 4c.11)

[3] Performed

4c.10.1 Date of performance if different from 6.0

(dd-mm-yyyy): |\_|\_|-|\_|\_|-|\_|\_|\_|\_|

4c.10.2 Test result (value-unit): \_\_\_\_\_ - \_\_\_\_\_

#### 4c.11 Pre-ALB

[1] Not performed (skip to 4c.12)

[2] Not clear (skip to 4c.12)

[3] Performed

4c.11.1 Date of performance if different from 6.0

(dd-mm-yyyy): |\_|\_|-|\_|\_|-|\_|\_|\_|\_|

4c.11.2 Test result (value-unit): \_\_\_\_\_ - \_\_\_\_\_

#### 4c.12 Ca

[1] Not performed (skip to 4c.13)

[2] Not clear (skip to 4c.13)

[3] Performed

4c.12.1 Date of performance if different from 6.0

(dd-mm-yyyy): |\_|\_|-|\_|\_|-|\_|\_|\_|\_|

4c.12.2 Test result (value-unit): \_\_\_\_\_ - \_\_\_\_\_

## 4c.13 Fe

[1] Not performed (skip to 4c.14)

[2] Not clear (skip to 4c.14)

[3] Performed

4c.13.1 Date of performance if different from 6.0

(dd-mm-yyyy): |\_|\_|-|\_|\_|-|\_|\_|\_|\_|

4c.13.2 Test result (value-unit): \_\_\_\_\_ - \_\_\_\_\_

## 4c.14 FIB

[1] Not performed (skip to 4c.15)

[2] Not clear (skip to 4c.15)

[3] Performed

4c.14.1 Date of performance if different from 6.0

(dd-mm-yyyy): |\_|\_|-|\_|\_|-|\_|\_|\_|\_|

4c.14.2 Test result (value-unit): \_\_\_\_\_ - \_\_\_\_\_

## 4c.15 D-D

[1] Not performed (skip to 4c.16)

[2] Not clear (skip to 4c.16)

[3] Performed

4c.15.1 Date of performance if different from 6.0

(dd-mm-yyyy): |\_|\_|-|\_|\_|-|\_|\_|\_|\_|

4c.15.2 Test result (value-unit): \_\_\_\_\_ - \_\_\_\_\_

## 4c.16 Na

[1] Not performed (skip to 4c.17)

[2] Not clear (skip to 4c.17)

[3] Performed

4c.16.1 Date of performance if different from 6.0

(dd-mm-yyyy): |\_|\_|-|\_|\_|-|\_|\_|\_|\_|

4c.16.2 Test result (value-unit): \_\_\_\_\_ - \_\_\_\_\_

## 4c.17 LDL

[1] Not performed (skip to 4c.18)

[2] Not clear (skip to 4c.18)

[3] Performed

4c.17.1 Date of performance if different from 6.0

(dd-mm-yyyy): |\_|\_|-|\_|\_|-|\_|\_|\_|\_|

4c.17.2 Test result (value-unit): \_\_\_\_\_ - \_\_\_\_\_

## 4c.18 LDL

[1] Not performed (skip to 4c.19)

[2] Not clear (skip to 4c.19)

[3] Performed

4c.18.1 Date of performance if different from 6.0

(dd-mm-yyyy): |\_|\_|-|\_|\_|-|\_|\_|\_|\_|

4c.18.2 Test result (value-unit): \_\_\_\_\_ - \_\_\_\_\_

## 4c.19 TG

[1] Not performed (skip to 4c.20)

[2] Not clear (skip to 4c.20)

[3] Performed

4c.19.1 Date of performance if different from 6.0

(dd-mm-yyyy): |\_|\_|-|\_|\_|-|\_|\_|\_|\_|

4c.19.2 Test result (value-unit): \_\_\_\_\_ - \_\_\_\_\_

## 4c.20 TCHOL

[1] Not performed (skip to 4d.1)

[2] Not clear (skip to 4d.1)

[3] Performed

4c.20.1 Date of performance if different from 6.0

(dd-mm-yyyy): |\_|\_|-|\_|\_|-|\_|\_|\_|\_|

4c.20.2 Test result (value-unit): \_\_\_\_\_ - \_\_\_\_\_

**d) Heart and lung function examinations**

## 4d.1 Electrocardiogram examination

[1] Not performed (skip to 4d.2)

[2] Performed

4d.1.1 Date of performance (dd-mm-yyyy): |\_|\_|-|\_|\_|-|\_|\_|\_|\_|

4d.1.2 Heart rate: |\_|\_|\_| times/minutes

4d.1.3 Diagnosis from electrocardiogram examination

[1] No abnormalities

[2] Abnormalities(specify)

## 4d.2 Lung function examinations

[1] Not performed (skip to 4e.1)

[2] Not clear (skip to 4e.1)

[3] Performed

4d.2.1 Date of performance (dd-mm-yyyy): |\_|\_|-|\_|\_|-|\_|\_|\_|\_|

4d.2.2 FVC (Tested/predicted value): /

4d.2.3 FEV1(Tested/predicted value): /

4d.2.4 FEV1/FVC%(Tested/predicted value): /

4d.2.5 TLCO SB(Tested/predicted value): /

4d.2.6 Ventilation function assessment:

[1] No abnormalities [2] Mildly reduced [3] Moderately reduced

[4] Severely reduced [5] Restrictive [6] Obstruction

[7] Mixed [8] Not clear

4d.2.7 Lung capacity

[1] No abnormalities [2] Increased total residue ratio [3] Low lung capacity

[4] Not clear

4d.2.8 Breath diffusion

[1] No abnormalities [2] Reduced [3] Not clear



## e) Histological/cytological examination

### 4e.1 Preoperative cytological

[1] Not performed (skip to 4e.2)

[2] Not clear (skip to 4e.2)

[3] Performed

#### 4e.1.1 If [3], preoperative cytological method:

[1] Needle biopsy [2] Sputum specimen examination [3] Bronchial lavage

[4] Others (specify)

#### 4e.1.2 If [3], preoperative cytological result:

[1] With cancer cells [2] Without cancer cells [3] Uncertain lesion

[4] Not clear

#### 4e.1.2.1 If '4e.1.2' selected [1], cytological type

[1] Adenocarcinoma [2] Squamous cell carcinoma

[3] Small cell carcinoma [4] Carcinoid

[5] Large cell carcinoma [6] Squamous cell carcinoma

[7] Sarcomatoid carcinoma [8] carcinoma from sialaden

[9] Not clear [10] Others (specify)

#### 4e.1.2.1.1 If '4e.1.2.1' selected [1], first class subtype code

[1] Pre-invasion lesion [2] Microinvasive adenocarcinoma

[3] Invasive adenocarcinoma [4] Variant invasive adenocarcinoma

[5] Others (specify)

[6] Not clear

#### 4e.1.2.1.1.1 If '4e.1.2.1.1' selected [1], second class subtype code

[1] Atypical adenocarcinoma like hyperplasia

[2] Adenocarcinoma in situ

[3] Not clear

#### 4e.1.2.1.1.2 If '4e.1.2.1.1' selected [3], second class subtype code

[1] Accumbens dominated [2] Acinar dominated

[3] Papillary dominated [4] Micro papillae dominated

[5] Entities with mucus dominated

[6] Not clear

#### 4e.1.2.1.1.3 If '4e.1.2.1.1' selected [4], second class subtype code

[1] Mucinous invasive adenocarcinoma

[2] Colloid [3] Fetal

[4] Intestinal [5] Others (specify)

[6] Not clear

### 4e.2 Preoperative histological

[1] Not performed (skip to 4e.3)

[2] Not clear (skip to 4e.3)

[3] Performed

#### 4e.2.1 If [3], method of preoperative histological biopsy:

[1] Ultrasound guided aspiration biopsy [2] CT guided aspiration biopsy

- 1  
2  
3 [3] Bronchoscopic biopsy [4] Nuclear magnetic puncture  
4 [5] Not clear [6] Others (specify)  
5  
6 4e.2.2 If [3], results of preoperative histological biopsy:  
7 [1] With cancer cells [2] Without cancer cells [3] Uncertain lesion  
8 [4] Not clear  
9  
10 4e.2.2.1 If [1], histological type:  
11 [1] Adenocarcinoma [2] Squamous cell carcinoma  
12 [3] Small cell carcinoma [4] Carcinoid  
13 [5] Large cell carcinoma [6] Squamous cell carcinoma  
14 [7] Sarcomatoid carcinoma [8] carcinoma from sialaden  
15 [9] Not clear [10] Others (specify)  
16  
17 4e.2.2.1.1 If '4e.2.2.1' selected [1], first class subtype code  
18 [1] Pre-invasion lesion [2] Microinvasive adenocarcinoma  
19 [3] Invasive adenocarcinoma [4] Variant invasive adenocarcinoma  
20 [5] Others (specify)  
21 [6] Not clear  
22  
23 4e.2.2.1.1 If '4e.2.2.1.1' selected [1], second class subtype code  
24 [1] Atypical adenocarcinoma like hyperplasia  
25 [2] Adenocarcinoma in situ  
26 [3] Not clear  
27  
28 4e.2.2.1.1.2 If '4e.2.2.1.1' selected [3], second class subtype code  
29 [1] Accumbens dominated [2] Acinar dominated  
30 [3] Papillary dominated [4] Micro papillae dominated  
31 [5] Entities with mucus dominated  
32 [6] Not clear  
33  
34 4e.2.2.1.1.3 If '4e.2.2.1.1' selected [4], second class subtype code  
35 [1] Mucinous invasive adenocarcinoma  
36 [2] Colloid [3] Fetal  
37 [4] Intestinal [5] Others (specify)  
38 [6] Not clear  
39  
40 4e.2.2.2 If 4e.2.2.1 information not available, please tick in histology type:  
41 [1] Small cell lung cancer [2] Non-small cell lung cancer [3] Benign lesion  
42 [4] Not clear [5] Others (specify)  
43  
44  
45  
46  
47 4e.3 Intraoperative biopsy of frozen mass:  
48 [1] Not performed (skip to 4e.4)  
49 [2] Not clear (skip to 4e.4)  
50 [3] Performed  
51  
52 4e.3.1 If [3], diagnosis of frozen mass biopsy:  
53 [1] Adenocarcinoma [2] Squamous cell carcinoma  
54 [3] Small cell carcinoma [4] Carcinoid  
55 [5] Large cell carcinoma [6] Squamous cell carcinoma  
56 [7] Sarcomatoid carcinoma [8] carcinoma from sialaden  
57 [9] Not clear [10] Others (specify)  
58  
59 4e.3.1.1 If '4e.3.1' selected [1], first class subtype code  
60

- 1  
2  
3 [1] Pre-invasion lesion [2] Micro invasive adenocarcinoma  
4 [3] Invasive adenocarcinoma [4] Variant invasive adenocarcinoma  
5 [5] Others (specify)  
6 [6] Not clear  
7  
8 4e.3.1.1.1 If '4e.3.1.1' selected [1], second class subtype code  
9  
10 [1] Atypical adenocarcinoma like hyperplasia  
11 [2] Adenocarcinoma in situ  
12 [3] Not clear  
13 4e.3.1.1.2 If '4e.3.1.1' selected [3], second class subtype code  
14  
15 [1] Accumbens dominated [2] Acinar dominated  
16 [3] Papillary dominated [4] Micro papillae dominated  
17 [5] Entities with mucus dominated  
18 [6] Not clear  
19 4e.3.1.1.3 If '4e.3.1.1' selected [4], second class subtype code  
20  
21 [1] Mucinous invasive adenocarcinoma  
22 [2] Colloid [3] Fetal  
23 [4] Intestinal [5] Others (specify)  
24 [6] Not clear  
25  
26

27 4e.4 Intraoperative biopsy of lymph node:

- 28 [1] Not performed (skip to 4e.5)  
29 [2] Not clear (skip to 4e.5)  
30 [3] Performed  
31  
32 4e.4.1 If [3], result of lymph node biopsy:  
33 [1] Metastasis [2] No metastasis  
34  
35

36 4e.5 Intraoperative biopsy of frozen margin of bronchus:

- 37 [1] Not performed (skip to 4e.6)  
38 [2] Not clear (skip to 4e.6)  
39 [3] Performed  
40  
41 4e.5.1 If [3], result of frozen margin of bronchus:  
42 [1] Margin tumor [2] No margin tumor  
43  
44

45 4e.6 Postoperative histological

- 46 [1] Not performed (skip to 4e.7.1)  
47 [2] Not clear (skip to 4e.7.1)  
48 [3] Performed  
49 4e.6.1 If [3], number of tumors:  
50 [1] Solitary tumor [2] More than 2 nodules [3] Not clear  
51 4e.6.1.1 The largest tumor size: |\_|\_|\*|\_|\_|\*|\_|\_|cm  
52 4e.6.1.2 If multiple tumor, the smallest tumor size: |\_|\_|\*|\_|\_|\*|\_|\_|cm  
53  
54 4e.6.2 Pathologic diagnosis  
55  
56 [1] Adenocarcinoma [2] Squamous cell carcinoma  
57 [3] Small cell carcinoma [4] Carcinoid  
58 [5] Large cell carcinoma [6] Squamous cell carcinoma  
59 [7] Sarcomatoid carcinoma [8] carcinoma from sialaden  
60

- 1  
2  
3 [9] Not clear [10] Others (specify)  
4 4e.6.2.1 If '4e.6.2' selected [1], first class subtype code  
5 [1] Pre-invasion lesion [2] Micro invasive adenocarcinoma  
6 [3] Invasive adenocarcinoma [4] Variant invasive adenocarcinoma  
7 [5] Others (specify)  
8 [6] Not clear  
9  
10 4e.6.2.1.1 If '4e.6.2.1' selected [1], second class subtype code  
11 [1] Atypical adenocarcinoma like hyperplasia  
12 [2] Adenocarcinoma in situ  
13 [6] Not clear  
14  
15 4e.6.2.1.2 If '4e.6.2.1' selected [3], second class subtype code  
16 [1] Accumbens dominated [2] Acinar dominated  
17 [3] Papillary dominated [4] Micro papillae dominated  
18 [5] Entities with mucus dominated  
19 [6] Not clear  
20  
21 4e.6.2.1.3 If '4e.6.2.1' selected [4], second class subtype code  
22 [1] Mucinous invasive adenocarcinoma  
23 [2] Colloid [3] Fetal  
24 [4] Intestinal [5] Others (specify)  
25 [6] Not clear  
26  
27 4e.6.3 Differentiation degree:  
28 [1] Well differentiated [2] Well and moderately differentiated  
29 [3] Moderately differentiated [4] Poorly differentiated  
30 [5] Middle and low differentiation [6] Undifferentiated  
31 [7] Not clear  
32  
33 4e.6.4 Associated with intrapulmonary metastasis  
34 [1] Yes [2] No (skip to 4e.6.9) [3] Not clear(skip to 4e.6.9)  
35  
36 4e.6.5 Invasion of pleura?  
37 [1] Yes [2] No [3] Not clear  
38  
39 4e.6.6 Invasion of the main bronchi?  
40 [1] Yes, distance is less than 2cm [2] Yes, distance is more than 2cm  
41 [3] No [3] Not clear  
42  
43 4e.6.7 Invasion of chest wall/septum/mediastinum/pericardium?  
44 [1] Yes(specify) [2] No [3] Not clear  
45  
46 4e.6.8 Invasion of mediastinum/heart/trachea/esophagus/vertebral body/carina?  
47 [1] Yes(specify) [2] No [3] Not clear  
48  
49 4e.6.9 Resection margin positive?  
50 [1] Not performed (skip to 4e.6.10)  
51 [2] Not clear (skip to 4e.6.10)  
52 [3] Positive  
53 [4] Negative  
54  
55 4e.6.10 The total number of lymph nodes detected  
56  
57 4e.6.11 The total number of lymph node metastasis  
58  
59 4e.6.12 Lymph node metastasis site  
60

- 1  
2  
3 [1] No metastasis [2] Ipsilateral bronchi or hilum  
4 [3] Ipsilateral mediastinum or carina  
5 [4] Contralateral mediastinum or hilum of lung, clavicle  
6 [5] Not clear  
7  
8

9 4e.7 Tumor marker

10 4e.7.1 Her-2(C-erbB-2) detection

11 [1] Not performed (skip to 4e.7.2)

12 [2] Not clear (skip to 4e.7.2)

13 [3] Performed (skip to 4e.7.2)

14 4e.7.1.1 If [3], method of detection

15 [1] Immunohistochemistry [2] FISH [3] Other(Specify)

16 4e.7.1.2 If [3], result of detection

17 [1] Positive [2] Negative [3] Other(Specify) [4] Not clear

18 4e.7.2 Anaplastic lymphoma kinase(ALK) detection

19 [1] Not performed (skip to 4e.7.3)

20 [2] Not clear (skip to 4e.7.3)

21 [3] Performed (skip to 4e.7.3)

22 4e.7.2.1 If [3], method of detection

23 [1] Immunohistochemistry [2] Genetic testing [3] Other(Specify)

24 4e.7.2.2 If [3], result of detection

25 [1] Positive [2] Negative [3] Other(Specify) [4] Not clear

26 4e.7.3 Epidermal growth factor receptor(EGFR) detection

27 [1] Not performed (skip to 4e.7.4)

28 [2] Not clear (skip to 4e.7.4)

29 [3] Performed (skip to 4e.7.4)

30 4e.7.4.1 If [3], method of detection

31 [1] Immunohistochemistry [2] Genetic testing [3] Other(Specify)

32 4e.7.3.2 If [3], result of detection

33 [1] Positive [2] Negative [3] Other(Specify) [4] Not clear

34 4e.7.4 K-ras detection

35 [1] Not performed (skip to 4e.7.5)

36 [2] Not clear (skip to 4e.7.5)

37 [3] Performed (skip to 4e.7.5)

38 4e.7.4.1 If [3], method of detection

39 [1] Immunohistochemistry [2] Gene mutation detection [3] Other(Specify)

40 4e.7.4.2 If [3], result of detection

41 [1] Positive [2] Negative [3] Other(Specify) [4] Not clear

42 4e.7.5 Other gene factor types detection

43 [1] Not performed (skip to 4f.1)

44 [2] Not clear (skip to 4f.1)

45 [3] Performed (skip to 4f.1)

46 4e.7.6.1 If [3], method of detection

47 [1] Immunohistochemistry [2] Gene mutation detection [3] Other(Specify)

48 4e.7.6.2 If [3], result of detection

[1] Positive      [2] Negative      [3] Other(Specify)      [4] Not clear

## f) Staging of lung cancer

### 4f.1 Type of staging available

[1] Clinical stage      [2] Pathological staging      [3] Not staging  
[4] Not clear

### 4f.2 Staging methods

[1] Clinical imaging      [2] Pathological staging      [3] Postoperative pathology  
[4] No      [5] Not clear

### 4f.3 If staged, details of TNM staging

#### 4f.3.1 Staging system

[1] The 6<sup>th</sup> edition of UICC/AJCC staging, published in 2002  
[2] The 7<sup>th</sup> edition of AHCC staging, published in 2009

#### 4f.3.2 T staging

[1] T1; [2] T2; [3] T3; [4] T4; [5] Tx; [6] Not clear

#### 4f.3.3 N staging

[1] N1; [2] N2; [3] N3; [4] N0; [5] Not clear

#### 4f.3.4 M staging

[1] M1; [2] Mx; [3] M0; [4] Not clear

#### 4f.3.5 TNM staging

[1] Stage I; [2] Stage IIA; [3] Stage IIB; [4] Stage IIIA;  
[5] Stage IIIB; [6] Stage IV; [7] Others (specify); [8] Not clear

### 4f.4 Type of lung cancer:

[1] Small cell lung cancer      [2] Non-Small cell lung cancer  
[3] Mixed small cell lung cancer      [4] Not clear  
[5] Others (specify)

#### 4f.4.1 If [1], state of lesion

[1] Restricted      [2] Pervasive  
[3] Other (specify)

#### 4f.4.2 If [2], state of lesion

[1] Early stage      [2] Locally advanced  
[3] Advanced      [4] Not clear

## Part E: Treatment procedures and findings/results

### 5.1 Surgical treatment

[1] Not performed (skip to 5.2)  
[2] Thoracotomy  
[3] Video-assisted thoracoscopic surgery  
[4] Thoracoscope assisted small incision surgery  
[5] Others (specify)  
[6] Not clear(skip to 5.2)

## 5.1.1 Details of resection:

- |                        |                                            |
|------------------------|--------------------------------------------|
| [1] Lobectomy          | [2] Segmental resection                    |
| [3] Combined lobectomy | [4] Completely pneumonectomy               |
| [5] Sleeve lobectomy   | [6] Resection and reconstruction of carina |
| [7] Others (specify)   | [8] Not clear                              |

5.1.1.1 If [2], name of the segment

5.1.1.2 If [4], treatment of pulmonary arteriovenous in pericardium

- |         |        |               |
|---------|--------|---------------|
| [1] Yes | [2] No | [3] Not clear |
|---------|--------|---------------|

5.1.2 If [3], type of thoracoscope assistance:

- |                    |                  |                 |
|--------------------|------------------|-----------------|
| [1] Single hole    | [2] Double holes | [3] Three holes |
| [4] Multiple holes | [5] Not clear    |                 |

5.1.2.1 Conversion from video-assisted thoracoscopic surgery to Thoracotomy

- |         |        |               |
|---------|--------|---------------|
| [1] Yes | [2] No | [3] Not clear |
|---------|--------|---------------|

5.1.3 Performance of rapid pathology

- |         |        |               |
|---------|--------|---------------|
| [1] Yes | [2] No | [3] Not clear |
|---------|--------|---------------|

5.1.4 Findings from intraoperative exploration

5.1.4.1 Tumor site

- |                  |                  |                 |
|------------------|------------------|-----------------|
| [1] Left         | [2] Right        | [3] Upper lobes |
| [4] Bottom lobes | [5] Middle lobes | [6] Not clear   |

5.1.4.2 Cross lobes

- |         |        |               |
|---------|--------|---------------|
| [1] Yes | [2] No | [3] Not clear |
|---------|--------|---------------|

5.1.4.3 Pleural involvement/ Shrinkage

- |         |        |               |
|---------|--------|---------------|
| [1] Yes | [2] No | [3] Not clear |
|---------|--------|---------------|

5.1.4.4 Largest diameter of tumor: |||cm

5.1.4.5 Pleural metastasis

- |         |        |               |
|---------|--------|---------------|
| [1] Yes | [2] No | [3] Not clear |
|---------|--------|---------------|

5.1.4.6 Intrapulmonary metastasis

- |         |        |               |
|---------|--------|---------------|
| [1] Yes | [2] No | [3] Not clear |
|---------|--------|---------------|

5.1.4.7 Foreign invasion

- |         |        |               |
|---------|--------|---------------|
| [1] Yes | [2] No | [3] Not clear |
|---------|--------|---------------|

5.1.4.7.1 If [1], name of invaded tissue:

5.1.4.8 Dual(Multiple) primary tumor

- |         |        |               |
|---------|--------|---------------|
| [1] Yes | [2] No | [3] Not clear |
|---------|--------|---------------|

5.1.5 Lymph node dissection

- |                    |              |                 |               |
|--------------------|--------------|-----------------|---------------|
| [1] Systematicness | [2] Sampling | [3] Not cleaned | [4] Not Clear |
|--------------------|--------------|-----------------|---------------|

5.1.6 Classification of surgery

- |                  |                          |               |
|------------------|--------------------------|---------------|
| [1] Radical cure | [2] Palliative treatment | [3] Not clear |
|------------------|--------------------------|---------------|

5.2 Radiation therapy

[1] Not performed (skip to 5.3)

[2] Not clear (skip to 5.3)

[3] Performed

5.2.1 If [3], type of radiation therapy:

[1] Preoperative radiotherapy [2] Postoperative radiotherapy

[3] Radical radiation therapy

1  
2  
3 5.2.1.1 Combined with chemotherapy:

4 [1] Not performed (skip to 10.1.3)

5 [2] Not clear (skip to 10.1.3)

6 [3] Performed

7 5.2.1.1.1 If [3], type of chemo-radiotherapy:

8 [1] Sequence chemoradiotherapy [2] Concurrent chemoradiotherapy

9 5.2.1.1.2 If [2], name of the chemotherapy drugs

10 5.2.1.1.3 If [2], chemotherapy cycles:

11 [1] Every week [2] Biweekly [3] Every 3 weeks

12 [4] Every 4 weeks [5] Not clear

13 5.2.1.2 Radiotherapy technique

14 [1] Routine radiotherapy [2] Three-dimensional conformal radiotherapy

15 [3] Tomo treatment [4] Static intensity modulated radiotherapy

16 [5] Stereotactic radiotherapy [6] Rotational intensity modulated radiotherapy

17 [7] Not clear [8] Others (specify)

18 5.2.1.3 Polarization

19 [1] Conventional simulator [2] CT simulation [3] 4D-CT

20 [4] Not clear

21 5.2.1.4 Methods of pretreatment position verification

22 [1] No methods [2] Image guide radiation therapy

23 [3] Not clear [4] Electronic Portal Imaging Device

24 [5] Others (specify)

25 5.2.1.5 Radiation target area (multiple choice)

26 [1] Primary foci [2] Postoperative stump and tumor bed

27 [3] Involving lymph node irradiation [4] Choose lymph node irradiation

28 [5] Metastatic lesions [6] Not clear

29 5.2.1.6 Radiotherapy dose division program

30 No Radiation energy Total dose Gy Number of times Treatment time (days)

31 [1]

32 [2]

33 [3]

34 5.3 Chemotherapy

35 [1] Not performed (skip to 5.4)

36 [2] Not clear (skip to 5.4)

37 [3] Performed

38 5.3.1 If [3], type of chemotherapy:

39 [1] Neoadjuvant chemotherapy [2] Postoperative adjuvant chemotherapy

40 [3] Advanced chemotherapy [4] Others (specify)

41 5.3.1.1 If [1], neoadjuvant chemotherapy regimen

42 [1] Vinorelbine/Cisplatin+Vinorelbine/Carboplatin+Vinorelbine/Other platinum

43 [2] Paclitaxel/Cisplatin+Paclitaxel/Carboplatin+Paclitaxel/Other platinum

44 [3] Docetaxel/Cisplatin+ Docetaxel/Carboplatin +Docetaxel/Other platinum

45 [4] Pemetrexed/Cisplatin+Pemetrexed/Carboplatin+ Pemetrexed/Other platinum

46 [5] Gemcitabine/Cisplatin +Gemcitabine/Carboplatin +Gemcitabine/Other platinum



[6] Others (specify)

[7] Not clear

5.3.1.2 If [2], postoperative adjuvant chemotherapy regimen:

[1] Vinorelbine/Cisplatin+Vinorelbine/Carboplatin+Vinorelbine/Other platinum

[2] Paclitaxel/Cisplatin+Paclitaxel/Carboplatin+Paclitaxel/Other platinum

[3] Docetaxel/Cisplatin+Docetaxel/Carboplatin+Docetaxel/Other platinum

[4] Pemetrexed/Cisplatin+Pemetrexed/Carboplatin+Pemetrexed/Other platinum

[5] Gemcitabine/Cisplatin+Gemcitabine/Carboplatin+Gemcitabine/Other platinum

[6] Etoposide/Cisplatin+Etoposide/Carboplatin+Cyclophosphamide/Adriamycin/  
Vincristine

[7] Others (specify)

[8] Not clear

5.3.1.3 If [3], advanced chemotherapy regimen:

[1] Cisplatin+Carboplatin+Other platinum

[2] Paclitaxel+Docetaxel

[3] Emetabine

[4] Pemetrexed

[5] Vinorelbine+Vincristine

[6] Irinotecan+Topotecan

[7] Tegafur

[8] Etoposide

[9] Cytosine+Ifosfamide

[10] Adriamycin

[11] Others(specify)

[12] Not clear

5.4 Complication/comorbidities treatment

5.4.1 Superior vena cava syndrome

[1] Not appeared(skip to 5.4.2) [2] Not clear(skip to 5.4.2) [3] Appeared

5.4.1.1 If [3], duration (month):

5.4.1.2 If [3], treatment:

[1] No (skip to 5.4.2) [2] Not clear(skip to 5.4.2) [3] Yes

5.4.1.2.1 If[3], treatment effect:

[1] Improved [2] Progressed [3] Stable [4] Not clear

5.4.2 Spinal cord compression syndrome

[1] Not appeared (skip to 5.4.3) [2] Not clear(skip to 5.4.3) [3] Appear

5.4.2.1 If [3], duration (month):

5.4.2.2 If [3], treatment:

[1] No (skip to 5.4.3) [2] Not clear(skip to 5.4.3) [3] Yes

5.4.2.2.1 If [3], treatment effect:

[1] Improved [2] Progressed [3] Stable [4] Not clear

5.4.3 Brain metastases

[1] Not appeared (skip to 5.4.4) [2] Not clear(skip to 5.4.4) [3] Appear

5.4.3.1 If [3], duration (month):

5.4.3.2 If [3], treatment:

- 1  
2  
3 [1] No (skip to 5.4.4) [2] Not clear(skip to 5.4.4) [3] Yes  
4 5.4.3.2.1 If [3], treatment effect:  
5 [1] Improved [2] Progressed [3] Stable [4] Not clear  
6  
7 5.4.4 Meningeal metastases  
8 [1] Not appeared (skip to 5.4.5) [2] Not clear(skip to 5.4.5) [3] Appear  
9 5.4.4.1 If [3], duration (month):  
10 5.4.4.2 If [3], treatment:  
11 [1] No (skip to 5.4.5) [2] Not clear(skip to 5.4.5) [3] Yes  
12 5.4.4.2.1 If [3], treatment effect:  
13 [1] Improved [2] Progressed [3] Stable [4] Not clear  
14  
15 5.4.5 Pleural effusion  
16 [1] Not appeared (skip to 5.4.6) [2] Not clear(skip to 5.4.6) [3] Appear  
17 5.4.5.1 If [3], duration (month):  
18 5.4.5.2 If [3], treatment:  
19 [1] No (skip to 5.4.6) [2] Not clear(skip to 5.4.6) [3] Yes  
20 5.4.5.2.1 If [3], treatment effect:  
21 [1] Improved [2] Progressed [3] Stable [4] Not clear  
22  
23 5.4.6 Pyoperitoneum  
24 [1] Not appeared (skip to 5.4.7) [2] Not clear(skip to 5.4.7) [3] Appear  
25 5.4.6.1 If [3], duration (month):  
26 5.4.6.2 If [3], treatment:  
27 [1] No (skip to 5.4.7) [2] Not clear(skip to 5.4.7) [3] Yes  
28 5.4.6.2.1 If [3], treatment effect:  
29 [1] Improved [2] Progressed [3] Stable [4] Not clear  
30  
31 5.4.7 Pericardial effusion  
32 [1] Not appeared(skip to 5.4.8) [2] Not clear(skip to 5.4.8) [3] Appear  
33 5.4.7.1 If [3], duration (month):  
34 5.4.7.2 If [3], treatment:  
35 [1] No (skip to 5.4.8) [2] Not clear(skip to 5.4.8) [3] Yes  
36 5.4.7.2.1 If [3], treatment effect:  
37 [1] Improved [2] Progressed [3] Stable [4] Not clear  
38  
39 5.4.8 Intestinal obstruction  
40 [1] Not appeared(skip to 5.4.9) [2] Not clear(skip to 5.4.9) [3] Appear  
41 5.4.8.1 If [3], duration (month):  
42 5.4.8.2 If [3], treatment:  
43 [1] No (skip to 5.4.9) [2] Not clear(skip to 5.4.9) [3] Yes  
44 5.4.8.2.1 If [3], treatment effect:  
45 [1] Improved [2] Progressed [3] Stable [4] Not clear  
46  
47 5.4.9 Pain  
48 [1] Not appeared (skip to 5.4.10) [2] Not clear(skip to 5.4.10) [3] Appear  
49 5.4.9.1 If [3], duration (month):  
50 5.4.9.2 If [3], treatment:  
51 [1] No (skip to 5.4.10) [2] Not clear(skip to 5.4.10) [3] Yes  
52 5.4.9.2.1 If [3], treatment effect (site and score):  
53  
54  
55  
56  
57  
58  
59  
60

## 5.4.10 Cerebral thrombosis/ hemorrhage

[1] Not appeared (skip to 5.4.11) [2] Not clear(skip to 5.4.11) [3] Appear

5.4.10.1 If [3], duration (month):

5.4.10.2 If [3], treatment:

[1] No (skip to 5.4.11) [2] Not clear(skip to 5.4.11) [3] Yes

5.4.10.2.1 If [3], treatment effect:

[1] Improved [2] Progressed [3] Stable [4] Not clear

## 5.4.11 Interstitial pneumonia

[1] Not appeared(skip to 5.4.12) [2] Not clear(skip to 5.4.12) [3] Appear

5.4.11.1 If [3], duration (month):

5.4.11.2 If [3], treatment:

[1] No (skip to 5.4.12) [2] Not clear(skip to 5.4.12) [3] Yes

5.4.11.2.1 If [3], treatment effect:

[1] Improved [2] Progressed [3] Stable [4] Not clear

## 5.4.12 Pulmonary embolism

[1] Not appeared(skip to 5.4.13) [2] Not clear(skip to 5.4.13) [3] Appear

5.4.12.1 If [3], duration (month):

5.4.12.2 If [3], treatment:

[1] No (skip to 5.4.13) [2] Not clear(skip to 5.4.13) [3] Yes

5.4.12.2.1 If [3], treatment effect:

[1] Improved [2] Progressed [3] Stable [4] Not clear

## 5.4.13 Cardiac insufficiency

[1] Not appeared(skip to 5.4.14) [2] Not clear(skip to 5.4.14) [3] Appear

5.4.13.1 If [3], duration (month):

5.4.13.2 If [3], treatment:

[1] No (skip to 5.4.14) [2] Not clear(skip to 5.4.14) [3] Yes

5.4.13.2.1 If [3], treatment effect:

[1] Improved [2] Progressed [3] Stable [4] Not clear

## 5.4.14 Arrhythmia

[1] Not appeared(skip to 5.4.15) [2] Not clear(skip to 5.4.15) [3] Appear

5.4.14.1 If [3], duration (month):

5.4.14.2 If [3], treatment:

[1] No (skip to 5.4.15) [2] Not clear(skip to 5.4.15) [3] Yes

5.4.14.2.1 If [3], treatment effect:

[1] Improved [2] Progressed [3] Stable [4] Not clear

## 5.4.15 Hypercoagulable state

[1] Not appeared (skip to 5.5) [2] Not clear(skip to 5.5) [3] Appear

5.4.15.1 If [3], duration (month):

5.4.15.2 If [3], treatment:

[1] No (skip to 5.5) [2] Not clear(skip to 5.5) [3] Yes

5.4.15.2.1 If [3], treatment effect:

[1] Improved [2] Progressed [3] Stable [4] Not clear

## 5.5 Other procedures

## 5.5.1 Interdisciplinary consultation

- [1] No (skip to 5.5.2) [2] Not clear(skip to 5.5.2) [3] Yes
- 5.5.1.1 Disciplines involved
- [1] Neurology [2] Infectious diseases [3] Nephrology
- [4] Endocrinology [5] Cardiovascular diseases
- [6] Others (specify)

5.5.1.2 Total times of consultation:

5.5.2 Psychological/behavioral intervention

- [1] No (skip to 5.5.3) [2] Not clear(skip to 5.5.3) [3] Yes

5.5.2.1 Type of interventions performed

- [1] Neurology [2] Infectious diseases [3] Nephrology
- [4] Endocrinology [5] Cardiovascular diseases
- [6] Others (specify)

5.5.2.2 Total sessions of intervention performed:

5.5.3 Traditional Chinese medicine used

- [1] No (skip to 10.1) [2] Not clear(skip to 10.1) [3] Yes

5.5.2.1 Regimen of TCM used (specify):

5.5.2.2 Duration of TCM use (days):

## Part F: Charges on the inpatient care

6.1 Total inpatient care fee:

6.2 Registration fee

6.3 Bed fee

6.4 Examination fee

6.5 Treatment fee

6.6 Operation fee

6.7 Laboratory fee

6.8 Nursing fee

6.9 Medicines fee

6.10 Other fee

Name of data extractor:

Date of data extraction(dd-mm-yyyy): |\_|\_|-|\_|\_|-|\_|\_|\_|\_|



## Part B: Patient's diagnostic and treatment procedures

2.1: When were you (or was he/she) first diagnosed with lung cancer?

Date of diagnosis (dd-mm-yyyy): |\_|\_|-|\_|\_|-|\_|\_|\_|\_|

2.2: Have you (or Has he/she) been hospitalized due to the lung cancer?

[1] Yes [2] No (skip to 3) [3] Not clear (skip to 3)

2.3: If yes, please tell me, one-by-one, where and when were (or was) you (or he/she) hospitalized due to the lung cancer and how much it costed respectively.

| No. | Name of hospital | Admission Date (mm-yyyy) | Total expenditure(RMB) |
|-----|------------------|--------------------------|------------------------|
| [1] |                  |                          |                        |
| [2] |                  |                          |                        |
| [3] |                  |                          |                        |
| [4] |                  |                          |                        |
| [5] |                  |                          |                        |
| [6] |                  |                          |                        |
| [7] |                  |                          |                        |
| [8] |                  |                          |                        |
| [9] |                  |                          |                        |

(Please add more lines as necessary)

2.4: Have you (or Has he/she) sought outpatient treatment for the lung cancer?

[1] Yes [2] No (skip to 3) [3] Not clear (skip to 3)

2.5: If yes, please tell me, one-by-one, where and when had (or was) you (or he/she) received outpatient treatment; what type of treat and how much it costed respectively.

| No. | Name of hospital | Date (mm-yyyy) | Type of treatment | Total expenditure(RMB) |
|-----|------------------|----------------|-------------------|------------------------|
| [1] |                  |                |                   |                        |
| [2] |                  |                |                   |                        |
| [3] |                  |                |                   |                        |
| [4] |                  |                |                   |                        |
| [5] |                  |                |                   |                        |
| [6] |                  |                |                   |                        |
| [7] |                  |                |                   |                        |
| [8] |                  |                |                   |                        |
| [9] |                  |                |                   |                        |

(Please add more lines as necessary)

2.6: Have you (or Has he/she) sought medical checkups for monitoring development of the lung cancer?

[1] Yes [2] No (skip to 4) [3] Not clear (skip to 4)

2.7: If yes, please tell me, one-by-one, where and when did the checkup happen and what were the findings respectively

| No. | Name of hospital | Date of checkup (mm-yyyy) | Reoccurrence | Metastasis |
|-----|------------------|---------------------------|--------------|------------|
| [1] |                  |                           |              |            |
| [2] |                  |                           |              |            |
| [3] |                  |                           |              |            |

1  
2  
3 [4]

4 [5]

5 [6]

6 [7]

7 [8]

8 [9]

9 (Please add more lines as necessary)

10  
11  
12  
13  
14 2.8: How are you (is he/she) now?

15 [1] Alive

[2] Deceased

16 2.6.1: If [2], when did it happen (dd-mm-yyyy) ? |\_|\_|-|\_|\_|-|\_|\_|\_|\_|

17  
18 2.9: In addition to the inpatient care and medical checkups mentioned above, have you ( or has he/she)  
19 tried other measures to cure the lung cancer?

20 [1] Yes

[2] No (skip to ending)

[3] Not clear (skip to ending)

21  
22 3.0: If yes, please tell me, one-by-one, what is it and how often it has/had been?

| No. | Name of practice | Description of practice | Frequency | Length (months) |
|-----|------------------|-------------------------|-----------|-----------------|
| 23  | [1]              |                         |           |                 |
| 24  | [2]              |                         |           |                 |
| 25  | [3]              |                         |           |                 |
| 26  | [4]              |                         |           |                 |
| 27  | [5]              |                         |           |                 |
| 28  | [6]              |                         |           |                 |
| 29  | [7]              |                         |           |                 |
| 30  | [8]              |                         |           |                 |
| 31  | [9]              |                         |           |                 |

23 [1]

24 [2]

25 [3]

26 [4]

27 [5]

28 [6]

29 [7]

30 [8]

31 [9]

32 (Please add more lines as necessary)

33  
34  
35  
36  
37  
38 Name of data extractor:

39 Date of data extraction(dd-mm-yyyy): |\_|\_|-|\_|\_|-|\_|\_|\_|\_|:

# BMJ Open

## Pathways and cost-effectiveness of routine lung cancer inpatient care in rural Anhui, China: a retrospective cohort study protocol

|                                 |                                                                                                                                                                                                                                                                                                                                                                                                                                                                                                                                                                                      |
|---------------------------------|--------------------------------------------------------------------------------------------------------------------------------------------------------------------------------------------------------------------------------------------------------------------------------------------------------------------------------------------------------------------------------------------------------------------------------------------------------------------------------------------------------------------------------------------------------------------------------------|
| Journal:                        | <i>BMJ Open</i>                                                                                                                                                                                                                                                                                                                                                                                                                                                                                                                                                                      |
| Manuscript ID                   | bmjopen-2017-018519.R2                                                                                                                                                                                                                                                                                                                                                                                                                                                                                                                                                               |
| Article Type:                   | Protocol                                                                                                                                                                                                                                                                                                                                                                                                                                                                                                                                                                             |
| Date Submitted by the Author:   | 13-Nov-2017                                                                                                                                                                                                                                                                                                                                                                                                                                                                                                                                                                          |
| Complete List of Authors:       | Shen, XingRong; Anhui Medical University School of Health Service Management<br>Diao, MengJie; Anhui Medical University School of Health Service Management<br>Lu, ManMan ; Anhui Medical University School of Health Service Management<br>Feng, Rui; Anhui Medical University, Library Department of Literature Retrieval and Analysis<br>Zhang, PanPan ; Anhui Medical University School of Health Service Management<br>Jiang, Tao ; Anhui Medical University School of Health Service Management<br>Wang, DeBin; Anhui Medical University, School of Health Services Management |
| <b>Primary Subject Heading</b>: | Health economics                                                                                                                                                                                                                                                                                                                                                                                                                                                                                                                                                                     |
| Secondary Subject Heading:      | Health services research                                                                                                                                                                                                                                                                                                                                                                                                                                                                                                                                                             |
| Keywords:                       | cost effectiveness, lung cancer, inpatient care, retrospective study, China                                                                                                                                                                                                                                                                                                                                                                                                                                                                                                          |
|                                 |                                                                                                                                                                                                                                                                                                                                                                                                                                                                                                                                                                                      |

SCHOLARONE™  
Manuscripts



# Pathways and cost-effectiveness of routine lung cancer inpatient care in rural Anhui, China: a retrospective cohort study protocol

XingRong Shen\*, MengJie Diao\*, ManMan Lu, Rui Feng, PanPan Zhang, Tao Jiang, Debin Wang<sup>#</sup>

**Corresponding author: Debing Wang.**

Post address: 81 Meishan Road, Hefei, Anhui, China. 230032.

Email: [dbwang@vip.sina.com](mailto:dbwang@vip.sina.com)

Telephone: (0086) 5116395

**XingRong Shen:**

School of Health Service Management, Anhui Medical University, Hefei, Anhui, China.

**MengJie Diao:**

School of Health Service Management, Anhui Medical University, Hefei, Anhui, China.

**ManMan Lu:**

School of Health Service Management, Anhui Medical University, Hefei, Anhui, China.

**Rui Feng:**

Department of Literature Review and Analysis, Library of Anhui Medical University, Hefei, Anhui, China.

**PanPan Zhang:**

School of Health Service Management, Anhui Medical University, Hefei, Anhui, China.

**Tao Jiang:**

School of Health Service Management, Anhui Medical University, Hefei, Anhui, China.

**Word count: 4085**

## ABSTRACT

**Introduction:** Routine inpatient care (RIC) for cancer patients forms various pathways of clinical procedures. Although most of the individual procedures comprising the pathways have been tested via clinical trials, little is known about the collective cost and effectiveness of the pathways as a whole. This study aims at examining RIC pathways for lung cancer patients from rural Anhui, China and their determinants and economic impacts.

**Methods and analysis:** The study adopts a retrospective cohort study design and proceeds in 5 steps. Step 1 defines 4 main categories of study variables including clinical procedures, direct cost and effectiveness of procedures, and factors affecting use of these procedures and their cost and effectiveness. Step 2 selects a cohort of 5000 lung cancer patients diagnosed between July 1, 2014 and June 30, 2015 from rural Anhui by clustered-random sampling. Step 3 retrieves the records of all the inpatient care episodes due to the lung cancer and extracts data about RIC procedures, proximate variables (e.g., Karnofsky performance status, lung function score) of patient outcomes and related factors (e.g., stage of cancer, age, gender) by 2 independent clinician researchers using a web-based form. Step 4 estimates the direct cost of each of the RIC procedures using micro-costing and collects data about ultimate patient outcomes (survival and progression-free survival) through a follow up survey of patients and/or their close relatives. Step 5 analyzes data collected and explores pathways of RIC procedures and their relations with patient outcomes, costs, cost-effect ratios and a whole range of clinical and socio-demographic factors using multivariate regression and path models.

**Ethics and dissemination:** The study protocol has been approved by authorized ethics committee of Anhui Medical University (reference number: 20170312). Findings from the study will be disseminated through conventional academic routes such as peer-reviewed publications and presentations at regional, national and international conferences.

### Trial registry

ISRCTN25595562

**Key words:** cost effectiveness, lung cancer, inpatient care, retrospective study, China

## Strengths and limitations of this study

- The study adopts a retrospective cohort study design involving a large representative sample of community patients;
- It provides data for determining the cost-effectiveness of different treatment approaches as a whole rather than individual procedures;
- It examines pathways of routine inpatient care for a huge but understudied Chinese rural population;
- It extracts data from routine records kept at different hospitals and thus suffers from discrepancies in performances and data qualities.

## Introduction

Lung cancer has been the most common cancer in the world for several decades.<sup>1</sup> Estimated new cases of the disease was 1.8 million in 2012 (12.9% of the total), 58% of which occurred in less developed regions. It was also the most common cause of death from cancer worldwide, being responsible for nearly one in five (1.59 million in absolute number) of the total.<sup>2</sup> In China, lung cancer incidence showed a slight decreasing trend in the past few years, particularly for males. However, it is still the top first cancer for males and second for females, accounting for 25.2% of all new cancer cases and 29.5% of all cancer deaths in 2012.<sup>3</sup>

Routine inpatient care (RIC) for lung cancer consists of a combination of procedures. Patients with possible lung cancer need a detailed history and physical examination first. Then they should undergo posterior-anterior and lateral chest radiographs as well as CT scans of the chest and abdomen. In order to further confirm and determine stage and histology of the lesion, other diagnostic methods needed include whole-body fluoro-deoxy-glucose positron emission tomography, endoscopic ultrasound, sputum cytology, fine-needle aspiration, bronchoscopy etc. Following diagnosis of lung cancer, the patients proceed with combined-modality therapies depending on stage of the disease and co-morbidities and complications. Historically, surgery provides the best chance for cure for patients whose lung cancers are limited to the hemithorax and can be totally encompassed by excision.<sup>4 5</sup> Surgery has been generally used in combination with external-beam radiotherapy for control of the primary tumor and regional lymphatics.<sup>6</sup> In addition, chemotherapy has also been advocated as an integral part of combined modality approaches to earlier stages of disease.<sup>7 8</sup> For unselected advanced none-small cell lung cancer, platinum-based combinations have become the standard of care; while cisplatin- or carboplatin-based doublets are standard for patients with stage IV disease.<sup>9 10</sup> More recently, EGFR tyrosine kinase inhibitors have been introduced in second- and third-line treatment of advanced disease and in first-line treatment for selected patients.<sup>11</sup>

Given the complex procedures, ensuring quality RIC for lung cancer patients has been most challenging and guidelines are widely used in addressing this challenge. Numerous

1  
2  
3 studies have documented positive relations between compliance with guidelines and  
4 patient outcomes.<sup>12 13</sup> However, researchers have also raised concerns about guidelines.  
5 One of such concerns refers to lack of adequate consideration of costs. Most clinical  
6 procedures not only affect disease outcomes but also incur considerable costs.<sup>14 15</sup> Yet  
7 guidelines are based on trials focused primarily on effectiveness (e.g., survival) with little  
8 attention being paid to economic consequences.<sup>16</sup> Another concern relates to  
9 incompatible population between clinical trials and RIC. Clinical trials on which  
10 guidelines are based use highly selected populations; while RIC serves a general lung  
11 cancer population with different age, performance status and comorbidities.<sup>17 18</sup> A third  
12 concern revolves uncertain interactions between procedures. Although most individual  
13 guideline recommended procedures (GRPs) have established evidences, they are not used  
14 in isolation but in conjunction with others forming various clinical combinations. Efforts  
15 systematically assessing and comparing these combinations are scarce.<sup>19-22</sup> A fourth  
16 concern originates from varied compliance with guidelines since RIC often deviates  
17 substantially from guidelines.<sup>23 24</sup> The cost-effectiveness of these “substandard” or mixed  
18 combinations of procedures (partly from guidelines, partly from experiences of  
19 individual clinicians) falls far from well-understood.<sup>25</sup> These all point to a clear need for  
20 evaluating RIC even though guidelines are widely available.  
21  
22  
23  
24  
25  
26

27 All the above concerns are most pertinent to China. First, China has a unique “dual”  
28 medical care system in which patients often receive western medicine and traditional  
29 Chinese medicine simultaneously or in turn.<sup>26</sup> Second, China lacks coordinated referral  
30 and follow up mechanisms and cancer patients often moves freely from one hospital to  
31 another for different rounds of inpatient cancer care.<sup>27</sup> This makes it hard for clinicians in  
32 leveraging different inpatient care episodes at different time points and hospitals into  
33 continuous and synergetic service. Third, China has strong socio-cultural norms and  
34 financial incentives that hinder cost control and guideline compliance.<sup>28</sup>  
35  
36  
37  
38

## 39 **Study aims**

40  
41  
42 This study aims at identifying main pathways of RIC procedures for lung cancer patients  
43 from rural Anhui, China and examining determinants of the pathways and economic  
44 impacts. Specific questions to be addressed include: a) what combinations of diagnosis  
45 and treatment procedures (or pathways for short) an individual patient may experience  
46 during all his/her hospitalization episodes due to lung cancer-related problems; b) which  
47 are the most and least frequent pathways; c) what determines the flow among these  
48 pathways; d) which are the most and least cost-effective pathways in relation to the other  
49 pathways; and e) what factors are associated with the relative cost-effectiveness.  
50  
51  
52

53 The above “pathways” of inpatient care means combinations of diagnosis and treatment  
54 procedures an individual patient may experience during all his/her hospitalization  
55 episodes due to lung cancer-related problems. Suppose a lung cancer patient experienced  
56  
57  
58  
59

6 times/rounds of hospitalized care and during each of these hospitalization episodes, the patient underwent several diagnosis and treatment procedures, all these procedures form the “pathway” of this particular patient.

## Methodology

### Identification of procedures

The study uses a self-designed and web-based data extraction form in identifying major clinical procedures described in any RIC record under concern. The form lists all major RIC procedures under two main domains, i.e., diagnostic procedures (e.g., chest X-ray, chest CT, neck ultrasonography) and treatment procedures (e.g., surgical therapy, chemotherapy, psycho-behavioral intervention).

### Estimation of costs

The study estimates overall and categorical costs (direct costs only) for each of the RIC procedures (e.g., lung function examination, computed tomography, white blood cell count) identified above using micro-costing techniques.<sup>29 30</sup> Taking the example of lung function examination, categorical costs include costs on personnel, equipment, materials, reagents and others needed in completing the examination; while overall cost of the procedure equals the sum of all these categorical costs. In addition, the study also calculates overall cost on individual inpatient by adding up the overall costs on all the clinical procedures he/she has received.

### Measurement of effectiveness

The study uses both proximal variables of outcomes (PV) and ultimate outcome (UO) measures of effectiveness of RIC procedures. The UO indicators derive from a follow up survey about 2 years and half after the first hospitalization and include overall survival (OS), progression-free survival (PFS), quality of life (QoL), and quality adjusted life years (QALYs). Here, QoL is assessed using the widely recognized EQ-5D-5L instrument.<sup>31</sup>

The PV measures come from RIC records and include Eastern Cooperative Oncology Group (ECOG), Karnofsky performance status (KPS) and compiled scores of: a) symptoms (e.g., chronic cough, chest pain, wasting syndrome); b) lung functions (e.g., forced vital capacity, forced one second expiratory volume), c) image findings (e.g., number of nodules identified in the lung, size of the largest nodules, presence of pleura or pericardial effusion). Each of these domain specific PV scores equals weighted sum of all sub-indicators within the domain. For example, the compiled score of “lung functions” equals the sum of weighted values of forced vital capacity, forced one second expiratory volume etc. Here the weights come from the coefficients of multivariate regression modeling using an UO indicator (e.g., OS) as the dependent variable; while forced vital

1  
2  
3 capacity, forced one second expiratory volume etc. as the independent variables; and  
4 stage of disease, age, gender and others as the confounding variables.  
5

### 6 **Calculation of cost-effectiveness**

7  
8 The study adopts relative cost-effectiveness ratios (RCERs) and incremental cost-  
9 effectiveness ratios (ICERs) as the main indicators for measuring cost-effectiveness.  
10 Here ICER is defined by the difference in cost between two selected sets of RIC  
11 procedures, divided by the difference in their effect. More specifically,  $ICER = (C_{r+x} -$   
12  $C_r)/(E_{r+x} - E_r)$ , where  $C_r$  and  $E_r$  is the cost and effect in the reference group and  
13  $C_{r+x}$  and  $E_{r+x}$ , the cost and effect in the group who have underwent all the procedures in  
14 the reference group plus x, a specific procedure under concern.<sup>32</sup> Suppose, x represents a  
15 commonly used traditional Chinese medicine (TCM) which incurs 100 dollars; while r, a  
16 typical combination of diagnosis and treatment procedures without the TCM. The  
17 combination without the TCM costs 1000 dollars and the survival time of patients who  
18 have adopted this combination is 1.5 years on average; while the same figure for patients  
19 who have used the combination plus the TCM is 1.51. Then the  $C_{r+x} = 1000 + 100 =$   
20  $1100$  dollars and the  $ICER$  of the TCM =  $(1100-100)/(1.51-1.5)=10000$  dollars per life  
21 year saved. Similarly,  $RCER = (C_{r+x}/E_{r+x})/(C_r/E_r) = (1100/1.51)/ (1000/1.50) =$   
22  $1.09$ .  
23  
24  
25  
26  
27

### 28 **Identification of influencing factors**

29  
30 The study also extracts, from RIC records, data about patient factors commonly believed  
31 to be linked with disease progression, treatment response and outcomes and utilization of  
32 RIC procedures. These include: a) socio-demographics (e.g., age, gender, body height  
33 and weight, education, employment, marital status, medical insurance); b) risk behaviors  
34 and histories (e.g., smoking, alcohol drinking, history of cancer among family members);  
35 c) historical and biological test findings (e.g., value of ALK, KRAS, EGFR, PDL1, CEA,  
36 CA125, proGRP); d) comorbidities and complications (e.g., presence of superior vena  
37 cava syndrome, brain metastases) and stage of disease. Here, disease staging uses TNM  
38 system and this staging will be treated as the most important factor throughout the data  
39 analysis especially in its effects on the flow of different pathways and their RCER/ICER.  
40  
41  
42  
43

### 44 **Selection of participants**

45  
46 The study is implemented in Anhui, an inland province located in middle and east China.  
47 It has a population of 61.4 million and its per capita GDP and income rank in the middle  
48 (the 14<sup>th</sup>) among all provinces in the nation.<sup>33 34</sup> Its social, cultural and economic  
49 background is representative of over 80% of the whole population in China.<sup>33 34</sup> The  
50 province has 68 rural counties and each of them divides into 10 to 20 townships.  
51 Selection of participating counties, townships, patients and RIC case records uses a  
52 clustered random sampling which proceeds in 5 steps. Step 1 classifies all the counties in  
53 Anhui into southern, northern and middle areas. Step 2 randomly selects 3 counties from  
54 each of these areas (12 counties in total). Step 3 randomly draws 4 townships from each  
55  
56  
57  
58  
59

1  
2  
3 of the counties selected (48 townships in total). Step 4 searches the provincial  
4 reimbursement database of the New Rural Cooperative Medical System (NRCMS) and  
5 identifies all the patients within the selected townships who had been first diagnosed with  
6 primary lung cancer during July 1, 2014 and June 30, 2015. Step 5 searches the database  
7 again for all episodes of hospitalization due to the lung cancer for the patients identified  
8 in step 4. NRCMS covers 98% of the rural residents and the estimated number of patients  
9 and admission episodes is about 5,000 and 25,000 respectively.  
10  
11

12  
13 The above sample size was determined by our study purpose of building multivariate  
14 models of factors affecting the flow among and RCER/ICER of specific RIC pathways.  
15 Lung cancer patients generally receive 4 to 6 rounds of inpatient care. Given the various  
16 diagnostic and treatment procedures available, there are hundreds of potential RIC  
17 pathways (combinations of diagnosis and treatment procedures from the first to the last  
18 round of RIC). We plan to group these pathways into manageable (around 20) categories  
19 depending on the resultant distribution of the actual pathways and we aim to enter 20-30  
20 factors into the multivariate models for each of these categorical pathways. Based on  
21 these pre-conditions and that the sample size of a multi-variable model should generally  
22 be 10 times the number of independent variables, we need 250 patients for each pathway.  
23 This translates into 5000 patients in total.  
24  
25  
26  
27

### 28 **Data collection**

29  
30 The study obtains data through follow-up survey and data extraction. The follow-up  
31 survey applies to all the lung cancer patients identified above. It solicits information  
32 about the patient's: a) disease progression (i.e., died, alive with or without progression);  
33 b) if died, date of death; c) additional admissions due to the lung cancer not included in  
34 the above mentioned NRCMS database. The survey uses a short structured questionnaire.  
35 Administration of the questionnaire starts with a telephone interview (of the patient under  
36 concern or his/her close relatives for up to 5 time attempts) followed by a face-to-face  
37 interview (of the same respondents for up to 2 attempts) if the telephone contacts have  
38 failed. The recruitment strives to reach over 85% rate of participation. And the  
39 researchers are trained to record reasons of attrition for each of the patients they have lost  
40 so as to allow for assessing potential biases. The data extraction applies to records of all  
41 the hospital admission episodes identified via the NRCMS database and the follow up  
42 survey. It uses a structured web-based form and extracts data about the clinical  
43 procedures, costs, effectiveness and influencing factors described above. Two  
44 experienced clinicians on care of lung cancer perform the data extraction. They visit (on  
45 one-by-one base) all the relevant hospitals, ask for permission to examine the full records  
46 and fill the worksheet independently first followed by discussions, if applicable, to solve  
47 discrepancies.  
48  
49  
50  
51  
52  
53  
54  
55  
56  
57  
58  
59  
60

## Data analysis

The data collected above allow a variety of descriptive and multivariate analysis concerning the costs and effectiveness of RIC. The effectiveness analysis comprises all the UO indicators mentioned above including progression free survival, overall survival, quality of life and DALYs. For each of these UO indicators, the analysis will produce: a) estimation of average rates or values with 95% confidence intervals at different time points after first diagnosis by disease stage, PV indicators, RIC pathways, non-hospital care categories, age range etc.; b) multivariate regression models using similar variables as independent variables; and c) path models using disease stage, RIC pathways, non-hospital care categories, age range etc. as exogenous, complied PV indices as direct endogenous, and individual PV indicators as indirect endogenous variables (Figure 1a). Area under ROC (receiver operating characteristic) curve will be calculated for assessing the predictability of models using binary classifier as the dependent variable (e.g., models of progression free survival, overall survival).

The cost analysis explores mainly: a) overall and categorical costs on different rounds of hospitalization by socio-demographic and selected clinical conditions (Figure 2); b) scatter plot of RIC procedures using the occurrence rate and unit cost of individual procedures as the coordinates; c) multivariate regression models of overall and selected categorical costs using disease stage, PV indicators, RIC pathways, non-hospital care categories, age range etc. as independent variables; and d) Markov models of mean cost for managing lung cancer patients (Figure 1b).

The cost-effectiveness analysis focuses primarily on constructing a pathway tree to help estimate expected overall and pathway specific cost, effectiveness and identify pathways with the highest or lowest RCER/ICER. The tree consists of different branches of combinations of RIC procedures starting from the first to the last episode of inpatient care labeled with estimated costs and possibilities along the pathways and outcomes at the end of the pathways (Figure 3). Relevance of the pathway tree is tested by means of, for instance, varying the percentage of patient flowing among the different pathways or the costs of major diagnostic and treatment procedures consisting the braches and then examining changes in the ranking of the pathways in terms of relative cost-effectiveness. The analysis also pays particular attention to identifying as many as comparable pairs of RIC pathways as possible and calculating RCERs/ICERs accordingly in a hope to uncover potential pathways with practice, policy and research implications.

The pathway tree construction will use TreeAge<sup>35</sup>; while the descriptive and multivariate model analysis, SPSS 16. Cases with missing data about a specific item will be excluded from the analysis involving the item and where applicable, the statistical null hypothesis is be rejected at the significance level of  $\alpha = 0.05$ .



### **Ethics and dissemination**

The study protocol had been reviewed and approved by the Biomedical Ethics Committee of Anhui Medical University (reference number: 20170312). Participation of hospitals, patients and their relatives are voluntary and written informed consent is required for all participants. Findings from the study will be disseminated through conventional academic routes such as peer-reviewed publications and presentations and regional, national and international conferences.

### **Discussion**

The study would share the experience of lung cancer care from the rural Chinese perspective. It is an important sharing of knowledge on population-based lung cancer care, since most economic evidence comes from Europe and North America. In China, traditional Chinese medicine is used to complement or replace western medicine. This results in quite different pathways of lung cancer care that have seldom been well explored in published literatures. China has a long history of almost no charges being made for clinical consultations and most patients are used to paying only for medicines, laboratory tests and equipment-based examinations. This forms a perverse financial incentive for clinicians for ordering more sophisticated examinations and tests and for over prescribing. China's lack of referral and follow up mechanisms also merits particular attention. As an individual patient changes from one hospital (say for the first round of treatment) to another (for the second round treatment), he/she may receive different treatment regimens. Discontinued treatment and follow up may make it hard for clinicians to base their treatment decisions on observed effects.

Perhaps the most noteworthy findings of the current study may be the description of the pathways of RIC procedures and their economic impacts (Figure 2). These pathways will provide easily understandable means for estimating and identifying, among others, the following: a) which pathways or combinations of procedures happen most or least in routine practice during different rounds of hospitalization for inpatients suffering from lung cancer in rural China; b) which pathways (from the first to last round of hospitalization) incur the highest or lowest direct costs; and c) which pathways result in the best or worst patient outcome in terms of different UO measures. These have important implications for clinical decision-making as well as policy-making.

Another point worth mentioning in particular refers to the links between the domain specific proximate (PV) indices to key ultimate outcome (UO) indicators (e.g., OS, PFS, QALYs) generated via a large scale (involving 5000 lung cancer patients) retrospective cohort study. They provide useful references for clinicians on care of lung cancer patients in selecting appropriate procedures to achieve optimal collective contributions to UO.<sup>36</sup> At present, although PV indicators are observed routinely, they are presented to clinicians as individual indicators rather than compiled indices. And given the large

1  
2  
3 number of PV indicators involved and the complex relations between RIC procedures  
4 and PV indicators and then UO indicators, it is difficult for practicing clinicians to make  
5 balanced decisions upon their personal experiences.<sup>37</sup>  
6

7  
8 In addition, this study addresses RIC for lung cancer at hospitals in China from a range  
9 of meaningful perspectives. The study reinforces the concepts introduced in the landmark  
10 studies of Fisher et al and Wennberg et al, which convincingly demonstrated that high  
11 quality was not necessarily associated with high cost.<sup>38</sup> Describing inpatient lung cancer  
12 care in a view that its value is directly proportional to outcomes and inversely  
13 proportional to costs helps in guiding quality improvement by either better outcomes  
14 and/or lower costs.<sup>39</sup> The study calculates and compares the collective costs and  
15 effectiveness of different RIC pathways as a whole and thus informs coordinated  
16 inpatient care episodes and procedures at different time points and hospitals. The study  
17 enables RCER/ICER estimation for specific guideline recommended procedures (GRPs)  
18 using various combinations of real and uncontrollable RIC procedures as the reference  
19 and thus enhances understanding and application of GRPs established through well-  
20 controlled studies in routine practice contexts.  
21  
22  
23  
24

25  
26 The study also has limitations. The first limit concerns data reliability. Although the  
27 majority of data are extracted from RIC records kept at hospitals, the study uses self-  
28 reported data about quality of life and inpatient, outpatient and home care. Self-reports  
29 are prone to various biases including recall problems particularly among the elderly, over  
30 or under reporting by the respondents for reasons like perceived expectations from the  
31 researchers or for fearing of potential worries or distress. These biases may be reduced to  
32 a minimum in our study by means of interviewer training, use of chorological recall and  
33 probing techniques, and cross-checks of findings from patient interviews, health  
34 insurance database and hospital records. More importantly, the study uses EQ-5D-5L in  
35 assessing quality of life. It has already been tested with adequate reliability both  
36 internationally and in China. Regarding non-hospitalized care, the study asks only simple  
37 questions about what kind of care the patients have experienced and when and for how  
38 long. These questions are relatively memorable and easy to answer. The second limit  
39 relates to selective study content. The study considers only inpatient care; while patients  
40 may use various self-treatment and outpatient treatment in addition to inpatient care.<sup>40 41</sup>  
41 Inpatient and non-inpatient treatment may substitute each other to some extent. These  
42 may result in under-estimation of the effectiveness of RIC procedures. Fortunately, this  
43 under-estimation may be offset to a large extent by treating non-hospital care as  
44 confounders and the study data to be collected allow this exercise. Third, the study  
45 considers only direct costs rather than full costs taking both direct and indirect costs into  
46 consideration. In addition, different hospitals use different equipment, reagents and  
47 medicines. Their quality of case records may also vary substantially. These raise  
48 compatibility concerns in pooling data from different hospitals together and performing  
49 aggregate analysis. Finally, readers may raise concerns about representativeness of  
50  
51  
52  
53  
54  
55  
56  
57  
58  
59  
60

1  
2  
3 inpatients to the larger cancer patients. Hospitalization rates documented from other  
4 countries vary greatly;<sup>42</sup> while similar data from China are scarce. Our estimation, using  
5 the dataset of the last province-wide Household Health Survey of Anhui, of the  
6 proportion of lung cancer patients who had been admitted to hospitals at least once was  
7 as high as 89%.<sup>43</sup>  
8  
9

## 10 **Competing interests**

11  
12  
13 The authors declare no competing interests.  
14  
15

## 16 **Authors' contributions**

17  
18 XS and MD contributed equally in conceiving this project, facilitating protocol and  
19 instrument development, and drafting this manuscript. RF, ML, PZ and TJ are core  
20 researchers for cost estimation, record extraction, follow up survey and data analysis  
21 respectively. DW provided expertise for overall design of the study, and revised and  
22 finalized the manuscript. All authors have read and approved the final submission.  
23  
24  
25

## 26 **Acknowledgements**

27  
28  
29 Development of the primitive protocol was supported by the Natural Science Foundation  
30 of China (grant number: 81172201). Refinement and implementation of the protocol is  
31 lead and supported by Collaboration Center for Cancer Control of Anhui Medical  
32 University, Anhui and Luan Center for Diseases Control and Prevention.  
33  
34

## 35 **References**

- 36  
37  
38 1. McErlean A, Ginsberg MS. Epidemiology of lung cancer. *Semin Roentgenol* 2011;46  
39 (3):173-7.  
40 2. World Health Organization. GLOBOCAN 2012: Estimated Cancer Incidence,  
41 Mortality and Prevalence Worldwide in 2012. <http://globocan.iarc.fr/Default.aspx>.  
42 3. Kong J, Xu F, He M, Chen K, et al. The incidence of lung cancer by histological type:  
43 a population-based study in Tianjin, China during 1981-2005. *Respirology*  
44 2014;19(8):1222-8.  
45 4. Woodard GA, Jablons DM. The Latest in Surgical Management of Stage IIIA Non-  
46 Small Cell Lung Cancer: Video-Assisted Thoracic Surgery and Tumor Molecular  
47 Profiling. *Am Soc Clin Oncol Educ Book* 2015;35:e435-41.  
48 5. Grunenwald DH. The role of surgery in non-small-cell lung cancers. *Ann Oncol*  
49 2005;16 Suppl 2:ii220-2.  
50 6. Ricardi U, Badellino S, Filippi AR. Stereotactic radiotherapy for early stage non-small  
51 cell lung cancer. *Radiat Oncol J.* 2015;33(2):57-65.  
52 7. Mangal S, Gao W, Li T1, Zhou QT. Pulmonary delivery of nanoparticle chemotherapy  
53 for the treatment of lung cancers: challenges and opportunities. *Acta Pharmacol Sin.*  
54 2017. doi: 10.1038/aps.2017.34.  
55  
56  
57  
58  
59  
60

- 1
- 2
- 3 8. Khan I, Morris S, Hackshaw A, et al. Cost-effectiveness of first-line erlotinib in
- 4 patients with advanced non-small-cell lung cancer unsuitable for chemotherapy. *BMJ*
- 5 *Open* 2015; 5(7):e006733.
- 6
- 7 9. Garon EB, Ciuleanu TE, Arrieta O, et al. Ramucirumab plus docetaxel versus placebo
- 8 plus docetaxel for second-line treatment of stage IV non-small-cell lung cancer after
- 9 disease progression on platinum-based therapy (REVEL): a multicentre, double-blind,
- 10 randomised phase 3 trial. *Lancet* 2014;384(9944):665-73.
- 11
- 12 10. Spigel DR, Luft A, Depenbrock H, et al. An Open-Label, Randomized, Controlled
- 13 Phase II Study of Paclitaxel-Carboplatin Chemotherapy With Necitumumab Versus
- 14 Paclitaxel-Carboplatin Alone in First-Line Treatment of Patients With Stage IV
- 15 Squamous Non-Small-Cell Lung Cancer. *Clin Lung Cancer* 2017; pii: S1525-
- 16 7304(17)30045-1.
- 17
- 18 11. Stinchcombe TE. The Use of EGFR Tyrosine Kinase Inhibitors in EGFR Wild-Type
- 19 Non-Small-Cell Lung Cancer. *Curr Treat Options Oncol* 2016; 17(4):18.
- 20
- 21 12. Ahmed HZ, Liu Y, O'Connell K, et al. Guideline-concordant Care Improves Overall
- 22 Survival for Locally Advanced Non-Small-cell Lung Carcinoma Patients: A National
- 23 Cancer Database Analysis. *Clin Lung Cancer* 2017; pii: S1525-7304(17)30114-6.
- 24
- 25 13. Nadpara P, Madhavan SS, Tworek C. Guideline-concordant timely lung cancer care
- 26 and prognosis among elderly patients in the United States: A population-based study.
- 27 *Cancer Epidemiol*; 39(6):1136-44.
- 28
- 29 14. Hinde S, McKenna C, Whyte S, et al. Modelling the cost-effectiveness of public
- 30 awareness campaigns for the early detection of non-small-cell lung cancer. *Br J*
- 31 *Cancer* 2015; 113(1):135-41.
- 32
- 33 15. Kumar G, Woods B, Hess LM, et al. Cost-effectiveness of first-line induction and
- 34 maintenance treatment sequences in non-squamous non-small cell lung cancer
- 35 (NSCLC) in the U.S. *Lung Cancer* 2015. pii: S0169-5002(15)00281-0.
- 36
- 37 16. Warren JL, Harlan LC, Trimble EL, et al. Trends in the receipt of guideline care and
- 38 survival for women with ovarian cancer: A population-based study. *Gynecol Oncol*
- 39 2017;145(3):486-492.
- 40
- 41 17. Jennens RR, Giles GG, Fox RM. Increasing underrepresentation of elderly patients
- 42 with advanced colorectal or non-small-cell lung cancer in chemotherapy trials. *Int*
- 43 *Med J* 2006;36: 216e220.
- 44
- 45 18. Murthy VH, Krumholtz HM, Gross CP. Participation in cancer clinical trials; race-,
- 46 sex-, and age-based disparities. *JAMA* 2004;22(291): 2720-2726.
- 47
- 48 19. Tong Y, Huang C, Zhang J. A novel EGFR-TKI inhibitor (cAMP-H3BO3 complex)
- 49 combined with thermal therapy is a promising strategy to improve lung cancer
- 50 treatment outcomes. *Oncotarget*. Published Online First: 04 May 2017.doi:
- 51 10.18632/oncotarget.17628.
- 52
- 53 20. National Health and Family Planning Commission of China. Guideline for Chinese
- 54 primary lung cancer diagnosis and treatment (2015 edition). *Chinese Journal of*
- 55 *Oncology* 2015.37(1):67-78.
- 56
- 57 21. Xing Wang, Shi Yan, Yaqi Wang, et al.Surgical Quality Surveillance and Sustaining
- 58 Improvement of Lung Cancer Surgery Based On Standard Operation
- 59 Procedure(SOP) : Experience of Single Surgical Team. *Chinese Journal of Lung*
- 60 *Cancer*; 20(4): 253-258.
22. Jackman DM, Zhang Y, Dalby C, et al. Cost and Survival Analysis Before and After
- Implementation of Dana-Farber Clinical Pathways for Patients With Stage IV Non-

- Small-Cell Lung Cancer. *J Oncol Pract* 2017;13(4):e346-e352.
23. Okita A, Yamashita M, Abe K, et al. Variance analysis of a clinical pathway of video-assisted single lobectomy for lung cancer. *Surg Today* 2009;39(2):104-9.
  24. Duggan KJ, Descallar J, Vinod SK. Application of Guideline Recommended Treatment in Routine Clinical Practice: A Population-based Study of Stage I-IIIb Non-small Cell Lung Cancer. *Clin Oncol (R Coll Radiol)* 2016;28(10):639-47.
  25. Heins MJ, de Jong JD, Spronk I, et al. Adherence to cancer treatment guidelines: influence of general and cancer-specific guideline characteristics. *Eur J Public Health* 2016; pii: ckw234. doi: 10.1093/eurpub/ckw234.
  26. Yang S, Cui M, Li HY, et al. Meta-analysis of the effectiveness of Chinese and Western integrative medicine on medium and advanced lung cancer. *Chin J Integr Med* 2012;18(11):862-7.
  27. XX L, YW Chen, KS Bi. Resolution of Two- way Recerral Problem in China by Studying British National Health Service System. *Chinese General Practice* 2013; 31(16):2926-29.
  28. Y Sun, J Wu, SB Xie, et al. Evaluation of the medical staff clinical pathway adherence: Based on comparison of before and after provider payment reform in Henan Province. *Chinese Journal of Health Policy* 2013;6(5):37-43.
  29. Henry SG, Ness RM, Stiles RA, Shintani AK, Dittus RS. A cost analysis of colonoscopy using microcosting and time-and-motion techniques. *J Gen Intern Med* 2007, 22(10):1415-21.
  30. Cressman S, Lam S, Tammemagi MC, et al. Resource utilization and costs during the initial years of lung cancer screening with computed tomography in Canada. *J Thorac Oncol* 2014, 9(10):1449-58.
  31. Khan I, Morris S, Pashayan N, et al. Comparing the mapping between EQ-5D-5L, EQ-5D-3L and the EORTC-QLQ-C30 in non-small cell lung cancer patients. *Health Qual Life Outcomes* 2016, 14:60.
  32. SN York. Incremental Cost-Effectiveness Ratio. *Handbook of Disease Burdens and Quality of Life Measures* 2010: 4235-4235.
  33. National Bureau of Statistics of China. China Statistical Yearbook 2016. <http://www.stats.gov.cn/tjsj/ndsj/2016/indexch.htm> (accessed 1 July 2017).
  34. Statistics Bureau of Anhui Province. Statistical yearbook of Anhui Province in 2016. [http://www.ahtjj.gov.cn/tjj/web/tjnj\\_view.jsp?strColId=13787135717978521&\\_index=1#](http://www.ahtjj.gov.cn/tjj/web/tjnj_view.jsp?strColId=13787135717978521&_index=1#) (accessed 1 July 2017).
  35. Treege: Hollman C, Paulden M, Pechlivanoglou P, et al. A Comparison of Four Software Programs for Implementing Decision Analytic Cost-Effectiveness Models. *Pharmacoeconomics* 2017. doi: 10.1007/s40273-017-0510-8.
  36. Darling G, Malthaner R, Dickie J, et al. Quality indicators for non-small cell lung cancer operations with use of a modified Delphi consensus process. *Ann Thorac Surg* 2014;98(1):183-90.
  37. Fisher A, Manicavasagar V, Sharpe L, et al. A Qualitative Exploration of Clinician Views and Experiences of Treatment Decision-Making in Bipolar II Disorder. *Community Ment Health J*. Published Online First: 19 Jan 2017. doi: 10.1007/s10597-016-0077-4.
  38. Wennberg JE, Fisher ES. Finding high quality, efficient providers for value purchasing: cohort methods better than methods based on events. Finding high quality, efficient providers for value purchasing: cohort methods better than methods

- 1  
2  
3 based on events. *Med Care* 2002,40(10):853-5.
- 4 39. Chen LW, Wilson FA, Gregg A, et al. Measuring the Cost and Value of Quality  
5 Improvement Initiatives for Local Health Departments. *J Public Health Manag Pract*.  
6 Published Online First: 1 Mar 2017. doi: 10.1097/PHH.0000000000000552.
- 7 40. O' Regan P, Hegarty J. The importance of self-care for fatigue amongst patients  
8 undergoing chemotherapy for primary cancer. *Eur J Oncol Nurs* 2017;28:47-55.
- 9 41. Dionne-Odom JN, Demark-Wahnefried W, Taylor RA, et al. The self-care practices  
10 of family caregivers of persons with poor prognosis cancer: differences by varying  
11 levels of caregiver well-being and preparedness. *Support Care Cancer* 2017;  
12 25(8):2437-2444.
- 13 42. Prince RM, Atenafu EG, Krzyzanowska MK. Hospitalizations During Systemic  
14 Therapy for Metastatic Lung Cancer: A Systematic Review of Real World vs Clinical  
15 Trial Outcomes. *JAMA Oncol* 2015, 1(9):1333-9.
- 16 43. Zhao T, Cheng J, Chai J, et al. Inpatient care burden due to cancers in Anhui, China:  
17 a cross-sectional household survey. *BMC Public Health* 2016, 16:308.
- 18  
19  
20  
21  
22  
23  
24  
25  
26  
27  
28  
29  
30  
31  
32  
33  
34  
35  
36  
37  
38  
39  
40  
41  
42  
43  
44  
45  
46  
47  
48  
49  
50  
51  
52  
53  
54  
55  
56  
57  
58  
59  
60

1  
2  
3 Figure 1 Schematic structure of sample multivariate models to be built  
4

5 Figure 2 Simulated cost by selected socio-demographics and clinical characteristics  
6 (TC=total cost; KRMB=1000 Chinese yuan)  
7

8 Figure 3 Anticipated “procedure-outcome” tree of inpatient lung cancer care (Tx = the x<sup>th</sup>  
9 round of hospitalization; Cx = the x<sup>th</sup> combination of clinical procedures; Px = possibility  
10 of using the x<sup>th</sup> combinations of clinical procedures; Ox = the x<sup>th</sup> patient outcome  
11 index/indicator)  
12  
13  
14  
15  
16  
17  
18  
19  
20  
21  
22  
23  
24  
25  
26  
27  
28  
29  
30  
31  
32  
33  
34  
35  
36  
37  
38  
39  
40  
41  
42  
43  
44  
45  
46  
47  
48  
49  
50  
51  
52  
53  
54  
55  
56  
57  
58  
59  
60

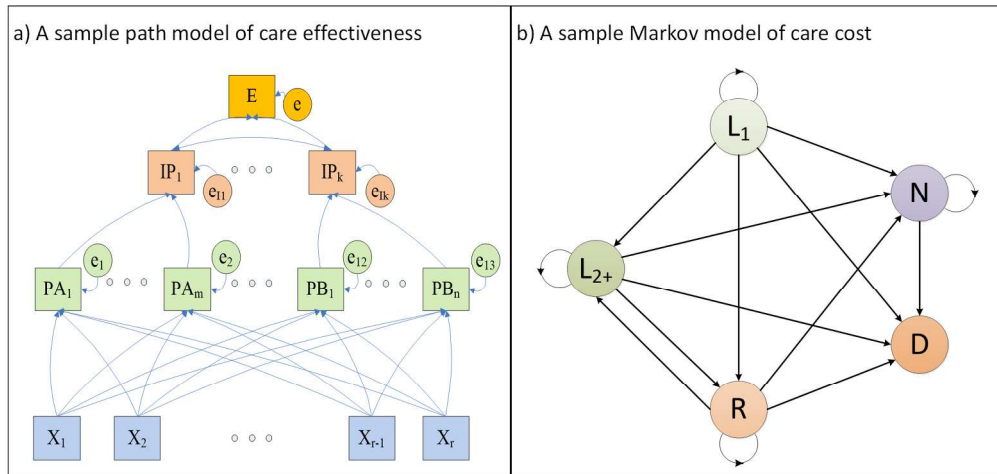

Figure 1 Schematic structure of sample multivariate models to be built/ X=independent variables; PA or PB=domain A or proximate indicators of effectiveness; IP=index of proximate variables; e=systematic error; and E= effectiveness, e.g., overall survival, QALYs; L<sub>1</sub>=first line treatment; L<sub>2+</sub>=second or third line treatment; R=remission; N=no active treatment; D=death.

188x88mm (300 x 300 DPI)





Figure 2 Simulated cost by selected socio-demographics and clinical characteristics (TC=total cost; KRMB=1000 Chinese yuan)

249x187mm (300 x 300 DPI)

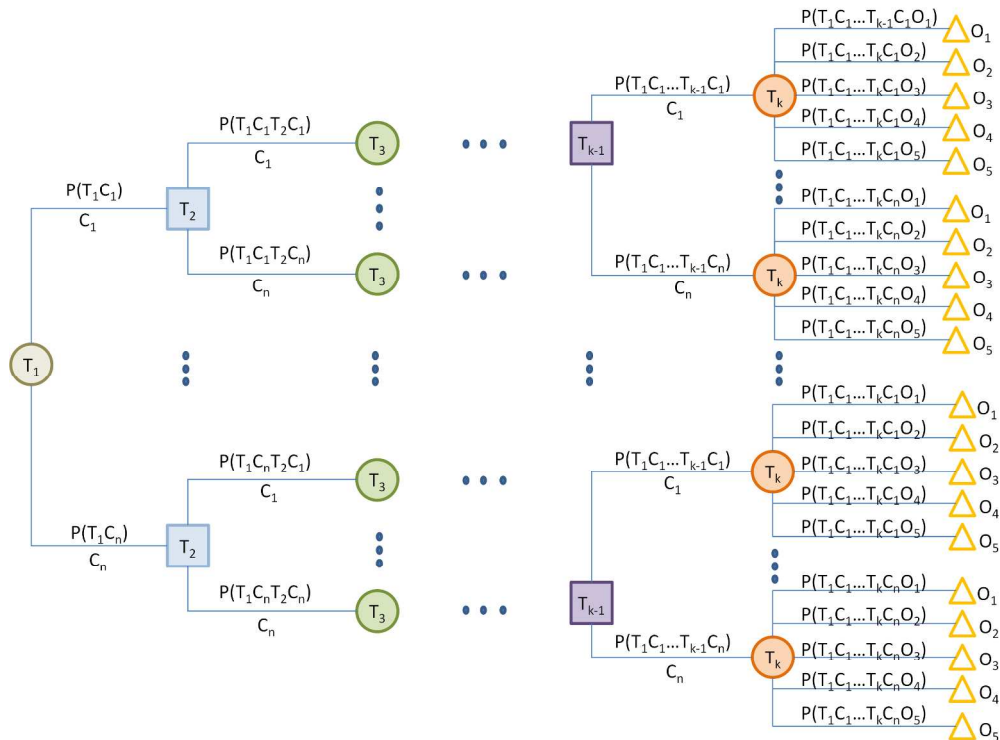

Figure 3 Anticipated "procedure-outcome" tree of inpatient lung cancer care ( $T_x$  = the  $x^{\text{th}}$  round of hospitalization;  $C_x$  = the  $x^{\text{th}}$  combination of clinical procedures;  $P_x$  = possibility of using the  $x^{\text{th}}$  combinations of clinical procedures;  $O_x$  = the  $x^{\text{th}}$  patient outcome index/indicator)

242x183mm (300 x 300 DPI)

# BMJ Open

## Pathways and cost-effectiveness of routine lung cancer inpatient care in rural Anhui, China: a retrospective cohort study protocol

|                                 |                                                                                                                                                                                                                                                                                                                                                                                                                                                                                                                                                                                      |
|---------------------------------|--------------------------------------------------------------------------------------------------------------------------------------------------------------------------------------------------------------------------------------------------------------------------------------------------------------------------------------------------------------------------------------------------------------------------------------------------------------------------------------------------------------------------------------------------------------------------------------|
| Journal:                        | <i>BMJ Open</i>                                                                                                                                                                                                                                                                                                                                                                                                                                                                                                                                                                      |
| Manuscript ID                   | bmjopen-2017-018519.R3                                                                                                                                                                                                                                                                                                                                                                                                                                                                                                                                                               |
| Article Type:                   | Protocol                                                                                                                                                                                                                                                                                                                                                                                                                                                                                                                                                                             |
| Date Submitted by the Author:   | 04-Dec-2017                                                                                                                                                                                                                                                                                                                                                                                                                                                                                                                                                                          |
| Complete List of Authors:       | Shen, XingRong; Anhui Medical University School of Health Service Management<br>Diao, MengJie; Anhui Medical University School of Health Service Management<br>Lu, ManMan ; Anhui Medical University School of Health Service Management<br>Feng, Rui; Anhui Medical University, Library Department of Literature Retrieval and Analysis<br>Zhang, PanPan ; Anhui Medical University School of Health Service Management<br>Jiang, Tao ; Anhui Medical University School of Health Service Management<br>Wang, DeBin; Anhui Medical University, School of Health Services Management |
| <b>Primary Subject Heading</b>: | Health economics                                                                                                                                                                                                                                                                                                                                                                                                                                                                                                                                                                     |
| Secondary Subject Heading:      | Health services research                                                                                                                                                                                                                                                                                                                                                                                                                                                                                                                                                             |
| Keywords:                       | cost effectiveness, lung cancer, inpatient care, retrospective study, China                                                                                                                                                                                                                                                                                                                                                                                                                                                                                                          |
|                                 |                                                                                                                                                                                                                                                                                                                                                                                                                                                                                                                                                                                      |

SCHOLARONE™  
Manuscripts

# Pathways and cost-effectiveness of routine lung cancer inpatient care in rural Anhui, China: a retrospective cohort study protocol

XingRong Shen\*, MengJie Diao\*, ManMan Lu, Rui Feng, PanPan Zhang, Tao Jiang, Debin Wang<sup>#</sup>

**Corresponding author: Debing Wang.**

Post address: 81 Meishan Road, Hefei, Anhui, China. 230032.

Email: [dbwang@vip.sina.com](mailto:dbwang@vip.sina.com)

Telephone: (0086) 5116395

**XingRong Shen:**

School of Health Service Management, Anhui Medical University, Hefei, Anhui, China.

**MengJie Diao:**

School of Health Service Management, Anhui Medical University, Hefei, Anhui, China.

**ManMan Lu:**

School of Health Service Management, Anhui Medical University, Hefei, Anhui, China.

**Rui Feng:**

Department of Literature Review and Analysis, Library of Anhui Medical University, Hefei, Anhui, China.

**PanPan Zhang:**

School of Health Service Management, Anhui Medical University, Hefei, Anhui, China.

**Tao Jiang:**

School of Health Service Management, Anhui Medical University, Hefei, Anhui, China.

**Word count: 4085**

## ABSTRACT

**Introduction:** Routine inpatient care (RIC) for cancer patients forms various pathways of clinical procedures. Although most of the individual procedures comprising the pathways have been tested via clinical trials, little is known about the collective cost and effectiveness of the pathways as a whole. This study aims at examining RIC pathways for lung cancer patients from rural Anhui, China and their determinants and economic impacts.

**Methods and analysis:** The study adopts a retrospective cohort study design and proceeds in 5 steps. Step 1 defines 4 main categories of study variables including clinical procedures, direct cost and effectiveness of procedures, and factors affecting use of these procedures and their cost and effectiveness. Step 2 selects a cohort of 5000 lung cancer patients diagnosed between July 1, 2014 and June 30, 2015 from rural Anhui by clustered-random sampling. Step 3 retrieves the records of all the inpatient care episodes due to the lung cancer and extracts data about RIC procedures, proximate variables (e.g., Karnofsky performance status, lung function score) of patient outcomes and related factors (e.g., stage of cancer, age, gender) by 2 independent clinician researchers using a web-based form. Step 4 estimates the direct cost of each of the RIC procedures using micro-costing and collects data about ultimate patient outcomes (survival and progression-free survival) through a follow up survey of patients and/or their close relatives. Step 5 analyzes data collected and explores pathways of RIC procedures and their relations with patient outcomes, costs, cost-effect ratios and a whole range of clinical and socio-demographic factors using multivariate regression and path models.

**Ethics and dissemination:** The study protocol has been approved by authorized ethics committee of Anhui Medical University (reference number: 20170312). Findings from the study will be disseminated through conventional academic routes such as peer-reviewed publications and presentations at regional, national and international conferences.

### Trial registry

ISRCTN25595562

**Key words:** cost effectiveness, lung cancer, inpatient care, retrospective study, China

## Strengths and limitations of this study

- The study adopts a retrospective cohort study design involving a large representative sample of community patients;
- It provides data for determining the cost-effectiveness of different treatment approaches as a whole rather than individual procedures;
- It examines pathways of routine inpatient care for a huge but understudied Chinese rural population;
- It extracts data from routine records kept at different hospitals and thus suffers from discrepancies in performances and data qualities.

## Introduction

Lung cancer has been the most common cancer in the world for several decades.<sup>1</sup> Estimated new cases of the disease was 1.8 million in 2012 (12.9% of the total), 58% of which occurred in less developed regions. It was also the most common cause of death from cancer worldwide, being responsible for nearly one in five (1.59 million in absolute number) of the total.<sup>2</sup> In China, lung cancer incidence showed a slight decreasing trend in the past few years, particularly for males. However, it is still the top first cancer for males and second for females, accounting for 25.2% of all new cancer cases and 29.5% of all cancer deaths in 2012.<sup>3</sup>

Routine inpatient care (RIC) for lung cancer consists of a combination of procedures. Patients with possible lung cancer need a detailed history and physical examination first. Then they should undergo posterior-anterior and lateral chest radiographs as well as CT scans of the chest and abdomen. In order to further confirm and determine stage and histology of the lesion, other diagnostic methods needed include whole-body fluoro-deoxy-glucose positron emission tomography, endoscopic ultrasound, sputum cytology, fine-needle aspiration, bronchoscopy etc. Following diagnosis of lung cancer, the patients proceed with combined-modality therapies depending on stage of the disease and co-morbidities and complications. Historically, surgery provides the best chance for cure for patients whose lung cancers are limited to the hemithorax and can be totally encompassed by excision.<sup>4 5</sup> Surgery has been generally used in combination with external-beam radiotherapy for control of the primary tumor and regional lymphatics.<sup>6</sup> In addition, chemotherapy has also been advocated as an integral part of combined modality approaches to earlier stages of disease.<sup>7 8</sup> For unselected advanced none-small cell lung cancer, platinum-based combinations have become the standard of care; while cisplatin- or carboplatin-based doublets are standard for patients with stage IV disease.<sup>9 10</sup> More recently, EGFR tyrosine kinase inhibitors have been introduced in second- and third-line treatment of advanced disease and in first-line treatment for selected patients.<sup>11</sup>

Given the complex procedures, ensuring quality RIC for lung cancer patients has been most challenging and guidelines are widely used in addressing this challenge. Numerous

1  
2  
3 studies have documented positive relations between compliance with guidelines and  
4 patient outcomes.<sup>12 13</sup> However, researchers have also raised concerns about guidelines.  
5 One of such concerns refers to lack of adequate consideration of costs. Most clinical  
6 procedures not only affect disease outcomes but also incur considerable costs.<sup>14 15</sup> Yet  
7 guidelines are based on trials focused primarily on effectiveness (e.g., survival) with little  
8 attention being paid to economic consequences.<sup>16</sup> Another concern relates to  
9 incompatible population between clinical trials and RIC. Clinical trials on which  
10 guidelines are based use highly selected populations; while RIC serves a general lung  
11 cancer population with different age, performance status and comorbidities.<sup>17 18</sup> A third  
12 concern revolves uncertain interactions between procedures. Although most individual  
13 guideline recommended procedures (GRPs) have established evidences, they are not used  
14 in isolation but in conjunction with others forming various clinical combinations. Efforts  
15 systematically assessing and comparing these combinations are scarce.<sup>19-22</sup> A fourth  
16 concern originates from varied compliance with guidelines since RIC often deviates  
17 substantially from guidelines.<sup>23 24</sup> The cost-effectiveness of these “substandard” or mixed  
18 combinations of procedures (partly from guidelines, partly from experiences of  
19 individual clinicians) falls far from well-understood.<sup>25</sup> These all point to a clear need for  
20 evaluating RIC even though guidelines are widely available.  
21  
22  
23  
24  
25  
26

27 All the above concerns are most pertinent to China. First, China has a unique “dual”  
28 medical care system in which patients often receive western medicine and traditional  
29 Chinese medicine simultaneously or in turn.<sup>26</sup> Second, China lacks coordinated referral  
30 and follow up mechanisms and cancer patients often moves freely from one hospital to  
31 another for different rounds of inpatient cancer care.<sup>27</sup> This makes it hard for clinicians in  
32 leveraging different inpatient care episodes at different time points and hospitals into  
33 continuous and synergetic service. Third, China has strong socio-cultural norms and  
34 financial incentives that hinder cost control and guideline compliance.<sup>28</sup>  
35  
36  
37  
38

## 39 **Study aims**

40  
41 This study aims at identifying main pathways of RIC procedures for lung cancer patients  
42 from rural Anhui, China and examining determinants of the pathways and economic  
43 impacts. Specific questions to be addressed include: a) what combinations of diagnosis  
44 and treatment procedures (or pathways for short) an individual patient may experience  
45 during all his/her hospitalization episodes due to lung cancer-related problems; b) which  
46 are the most and least frequent pathways; c) what determines the flow among these  
47 pathways; d) which are the most and least cost-effective pathways in relation to the other  
48 pathways; and e) what factors are associated with the relative cost-effectiveness.  
49  
50  
51  
52

53 The above “pathways” of inpatient care means combinations of diagnosis and treatment  
54 procedures an individual patient may experience during all his/her hospitalization  
55 episodes due to lung cancer-related problems. Suppose a lung cancer patient experienced  
56  
57  
58  
59

1  
2  
3 6 times/rounds of hospitalized care and during each of these hospitalization episodes, the  
4 patient underwent several diagnosis and treatment procedures, all these procedures form  
5 the “pathway” of this particular patient.  
6  
7

## 8 **Methodology**

### 10 **Identification of procedures**

11 The study uses a self-designed and web-based data extraction form in identifying major  
12 clinical procedures described in any RIC record under concern. The form lists all major  
13 RIC procedures under two main domains, i.e., diagnostic procedures (e.g., chest X-ray,  
14 chest CT, neck ultrasonography) and treatment procedures (e.g., surgical therapy,  
15 chemotherapy, psycho-behavioral intervention).  
16  
17  
18

### 19 **Estimation of costs**

20 The study estimates overall and categorical costs (direct costs only) for each of the RIC  
21 procedures (e.g., lung function examination, computed tomography, white blood cell  
22 count) identified above using micro-costing techniques.<sup>29 30</sup> Taking the example of lung  
23 function examination, categorical costs include costs on personnel, equipment, materials,  
24 regents and others needed in completing the examination; while overall cost of the  
25 procedure equals the sum of all these categorical costs. In addition, the study also  
26 calculates overall cost on individual inpatient by adding up the overall costs on all the  
27 clinical procedures he/she has received.  
28  
29  
30  
31

### 32 **Measurement of effectiveness**

33 The study uses both proximal variables of outcomes (PV) and ultimate outcome (UO)  
34 measures of effectiveness of RIC procedures. The UO indicators derive from a follow up  
35 survey about 2 years and half after the first hospitalization and include overall survival  
36 (OS), progression-free survival (PFS), quality of life (QoL), and quality adjusted life  
37 years (QALYs). Here, OoL is assessed using the widely recognized EQ-5D-5L  
38 instrument.<sup>31</sup>  
39  
40  
41

42 The PV measures come from RIC records and include Eastern Cooperative Oncology  
43 Group (ECOG), Karnofsky performance status (KPS) and compiled scores of: a)  
44 symptoms (e.g., chronic cough, chest pain, wasting syndrome); b) lung functions (e.g.,  
45 forced vital capacity, forced one second expiratory volume), c) image findings (e.g.,  
46 number of nodules identified in the lung, size of the largest nodules, presence of pleura  
47 or pericardial effusion). Each of these domain specific PV scores equals weighted sum of  
48 all sub-indicators within the domain. For example, the compiled score of “lung functions”  
49 equals the sum of weighted values of forced vital capacity, forced one second expiratory  
50 volume etc. Here the weights come from the coefficients of multivariate regression  
51 modeling using an UO indicator (e.g., OS) as the dependent variable; while forced vital  
52  
53  
54  
55  
56  
57  
58  
59  
60



1  
2  
3 capacity, forced one second expiratory volume etc. as the independent variables; and  
4 stage of disease, age, gender and others as the confounding variables.  
5

### 6 **Calculation of cost-effectiveness**

7  
8 The study adopts relative cost-effectiveness ratios (RCERs) as the main indicators for  
9 measuring cost-effectiveness. Here RCER is defined by the difference in cost between  
10 two selected sets of RIC procedures, divided by the difference in their effect. More  
11 specifically,  $RCER = (C_{r+x} - C_r)/(E_{r+x} - E_r)$ , where  $C_r$  and  $E_r$  is the cost and effect in  
12 the reference group and  $C_{r+x}$  and  $E_{r+x}$ , the cost and effect in the group who have  
13 underwent all the procedures in the reference group plus x, a specific procedure under  
14 concern.<sup>32</sup> Suppose, x represents a commonly used traditional Chinese medicine (TCM)  
15 which incurs 100 dollars; while r, a typical combination of diagnosis and treatment  
16 procedures without the TCM. The combination without the TCM costs 1000 dollars and  
17 the survival time of patients who have adopted this combination is 1.5 years on average;  
18 while the same figure for patients who have used the combination plus the TCM is 1.51.  
19 Then the  $C_{r+x} = 1000 + 100 = 1100$  dollars and the RCER of the TCM =  $(1100-$   
20  $100)/(1.51-1.5)=10000$  dollars per life year saved. Similarly,  $RCER = (C_{r+x}/E_{r+x})/(C_r/$   
21  $E_r) = (1100/1.51)/ (1000/1.50) = 1.09$ .  
22  
23  
24  
25  
26

### 27 **Identification of influencing factors**

28 The study also extracts, from RIC records, data about patient factors commonly believed  
29 to be linked with disease progression, treatment response and outcomes and utilization of  
30 RIC procedures. These include: a) socio-demographics (e.g., age, gender, body height  
31 and weight, education, employment, marital status, medical insurance); b) risk behaviors  
32 and histories (e.g., smoking, alcohol drinking, history of cancer among family members);  
33 c) historical and biological test findings (e.g., value of ALK, KRAS, EGFR, PDL1, CEA,  
34 CA125, proGRP); d) comorbidities and complications (e.g., presence of superior vena  
35 cava syndrome, brain metastases) and stage of disease. Here, disease staging uses TNM  
36 system and this staging will be treated as the most important factor throughout the data  
37 analysis especially in its effects on the flow of different pathways and their RCER.  
38  
39  
40  
41  
42

### 43 **Selection of participants**

44 The study is implemented in Anhui, an inland province located in middle and east China.  
45 It has a population of 61.4 million and its per capita GDP and income rank in the middle  
46 (the 14<sup>th</sup>) among all provinces in the nation.<sup>33 34</sup> Its social, cultural and economic  
47 background is representative of over 80% of the whole population in China.<sup>33 34</sup> The  
48 province has 68 rural counties and each of them divides into 10 to 20 townships.  
49 Selection of participating counties, townships, patients and RIC case records uses a  
50 clustered random sampling which proceeds in 5 steps. Step 1 classifies all the counties in  
51 Anhui into southern, northern and middle areas. Step 2 randomly selects 3 counties from  
52 each of these areas (12 counties in total). Step 3 randomly draws 4 townships from each  
53 of the counties selected (48 townships in total). Step 4 searches the provincial  
54  
55  
56  
57  
58  
59  
60

1  
2  
3 reimbursement database of the New Rural Cooperative Medical System (NRCMS) and  
4 identifies all the patients within the selected townships who had been first diagnosed with  
5 primary lung cancer during July 1, 2014 and June 30, 2015. Step 5 searches the database  
6 again for all episodes of hospitalization due to the lung cancer for the patients identified  
7 in step 4. NRCMS covers 98% of the rural residents and the estimated number of patients  
8 and admission episodes is about 5,000 and 25,000 respectively.  
9

10  
11 The above sample size was determined by our study purpose of building multivariate  
12 models of factors affecting the flow among and RCER of specific RIC pathways. Lung  
13 cancer patients generally receive 4 to 6 rounds of inpatient care. Given the various  
14 diagnostic and treatment procedures available, there are hundreds of potential RIC  
15 pathways (combinations of diagnosis and treatment procedures from the first to the last  
16 round of RIC). We plan to group these pathways into manageable (around 20) categories  
17 depending on the resultant distribution of the actual pathways and we aim to enter 20-30  
18 factors into the multivariate models for each of these categorical pathways. Based on  
19 these pre-conditions and that the sample size of a multi-variable model should generally  
20 be 10 times the number of independent variables, we need 250 patients for each pathway.  
21 This translates into 5000 patients in total.  
22  
23  
24  
25

### 26 27 **Data collection**

28 The study obtains data through follow-up survey and data extraction. The follow-up  
29 survey applies to all the lung cancer patients identified above. It solicits information  
30 about the patient's: a) disease progression (i.e., died, alive with or without progression);  
31 b) if died, date of death; c) additional admissions due to the lung cancer not included in  
32 the above mentioned NRCMS database. The survey uses a short structured questionnaire.  
33 Administration of the questionnaire starts with a telephone interview (of the patient under  
34 concern or his/her close relatives for up to 5 time attempts) followed by a face-to-face  
35 interview (of the same respondents for up to 2 attempts) if the telephone contacts have  
36 failed. The recruitment strives to reach over 85% rate of participation. And the  
37 researchers are trained to record reasons of attrition for each of the patients they have lost  
38 so as to allow for assessing potential biases. The data extraction applies to records of all  
39 the hospital admission episodes identified via the NRCMS database and the follow up  
40 survey. It uses a structured web-based form and extracts data about the clinical  
41 procedures, costs, effectiveness and influencing factors described above. Two  
42 experienced clinicians on care of lung cancer perform the data extraction. They visit (on  
43 one-by-one base) all the relevant hospitals, ask for permission to examine the full records  
44 and fill the worksheet independently first followed by discussions, if applicable, to solve  
45 discrepancies.  
46  
47  
48  
49  
50  
51  
52

### 53 **Data analysis**

54 The data collected above allow a variety of descriptive and multivariate analysis  
55 concerning the costs and effectiveness of RIC. The effectiveness analysis comprises all  
56  
57  
58  
59

1  
2  
3 the UO indicators mentioned above including progression free survival, overall survival,  
4 quality of life and DALYs. For each of these UO indicators, the analysis will produce: a)  
5 estimation of average rates or values with 95% confidence intervals at different time  
6 points after first diagnosis by disease stage, PV indicators, RIC pathways, non-hospital  
7 care categories, age range etc.; b) multivariate regression models using similar variables  
8 as independent variables; and c) path models using disease stage, RIC pathways, non-  
9 hospital care categories, age range etc. as exogenous, complied PV indices as direct  
10 endogenous, and individual PV indicators as indirect endogenous variables (Figure 1a).  
11 Area under ROC (receiver operating characteristic) curve will be calculated for assessing  
12 the predictability of models using binary classifier as the dependent variable (e.g.,  
13 models of progression free survival, overall survival).  
14  
15  
16  
17

18 The cost analysis explores mainly: a) Markov models of mean cost for managing lung  
19 cancer patients (Figure 1b); b) overall and categorical costs on different rounds of  
20 hospitalization by socio-demographic and selected clinical conditions (Figure 2); c)  
21 scatter plot of RIC procedures using the occurrence rate and unit cost of individual  
22 procedures as the coordinates; and d) multivariate regression models of overall and  
23 selected categorical costs using disease stage, PV indicators, RIC pathways, non-hospital  
24 care categories, age range etc. as independent variables.  
25  
26  
27

28 The cost-effectiveness analysis focuses primarily on constructing a pathway tree to help  
29 estimate expected overall and pathway specific cost, effectiveness and identify pathways  
30 with the highest or lowest RCER. The tree consists of different branches of combinations  
31 of RIC procedures starting from the first to the last episode of inpatient care labeled with  
32 estimated costs and possibilities along the pathways and outcomes at the end of the  
33 pathways (Figure 3). Relevance of the pathway tree is tested by means of, for instance,  
34 varying the percentage of patient flowing among the different pathways or the costs of  
35 major diagnostic and treatment procedures consisting the braches and then examining  
36 changes in the ranking of the pathways in terms of relative cost-effectiveness. The  
37 analysis also pays particular attention to identifying as many as comparable pairs of RIC  
38 pathways as possible and calculating RCER accordingly in a hope to uncover potential  
39 pathways with practice, policy and research implications.  
40  
41  
42  
43  
44

45 The pathway tree construction will use TreeAge<sup>35</sup>; while the descriptive and multi-  
46 variate model analysis, SPSS 16. Cases with missing data about a specific item will be  
47 excluded from the analysis involving the item and where applicable, the statistical null  
48 hypothesis is be rejected at the significance level of  $\alpha = 0.05$ .  
49  
50

### 51 **Ethics and dissemination**

52 The study protocol had been reviewed and approved by the Biomedical Ethics  
53 Committee of Anhui Medical University (reference number: 20170312). Participation of  
54 hospitals, patients and their relatives are voluntary and written informed consent is  
55  
56  
57  
58  
59  
60

1  
2  
3 required for all participants. Findings from the study will be disseminated through  
4 conventional academic routes such as peer-reviewed publications and presentations and  
5 regional, national and international conferences.  
6

## 7 8 **Discussion** 9

10 The study would share the experience of lung cancer care from the rural Chinese  
11 perspective. It is an important sharing of knowledge on population-based lung cancer  
12 care, since most economic evidence comes from Europe and North America. In China,  
13 traditional Chinese medicine is used to complement or replace western medicine. This  
14 results in quite different pathways of lung cancer care that have seldom been well  
15 explored in published literatures. China has a long history of almost no charges being  
16 made for clinical consultations and most patients are used to paying only for medicines,  
17 laboratory tests and equipment-based examinations. This forms a perverse financial  
18 incentive for clinicians for ordering more sophisticated examinations and tests and for  
19 over prescribing. China's lack of referral and follow up mechanisms also merits  
20 particular attention. As an individual patient changes from one hospital (say for the first  
21 round of treatment) to another (for the second round treatment), he/she may receive  
22 different treatment regimens. Discontinued treatment and follow up may make it hard for  
23 clinicians to base their treatment decisions on observed effects.  
24  
25  
26  
27  
28  
29

30 Perhaps the most noteworthy findings of the current study may be the description of the  
31 pathways of RIC procedures and their economic impacts (Figure 2). These pathways will  
32 provide easily understandable means for estimating and identifying, among others, the  
33 following: a) which pathways or combinations of procedures happen most or least in  
34 routine practice during different rounds of hospitalization for inpatients suffering from  
35 lung cancer in rural China; b) which pathways (from the first to last round of  
36 hospitalization) incur the highest or lowest direct costs; and c) which pathways result in  
37 the best or worst patient outcome in terms of different UO measures. These have  
38 important implications for clinical decision-making as well as policy-making.  
39  
40  
41

42 Another point worth mentioning in particular refers to the links between the domain  
43 specific proximate (PV) indices to key ultimate outcome (UO) indicators (e.g., OS, PFS,  
44 QALYs) generated via a large scale (involving 5000 lung cancer patients) retrospective  
45 cohort study. They provide useful references for clinicians on care of lung cancer patients  
46 in selecting appropriate procedures to achieve optimal collective contributions to UO.<sup>36</sup>  
47 At present, although PV indicators are observed routinely, they are presented to  
48 clinicians as individual indicators rather than compiled indices. And given the large  
49 number of PV indicators involved and the complex relations between RIC procedures  
50 and PV indicators and then UO indicators, it is difficult for practicing clinicians to make  
51 balanced decisions upon their personal experiences.<sup>37</sup>  
52  
53  
54  
55  
56  
57  
58  
59  
60

1  
2  
3 In addition, this study addresses RIC for lung cancer at hospitals in China from a range  
4 of meaningful perspectives. The study reinforces the concepts introduced in the landmark  
5 studies of Fisher et al and Wennberg et al, which convincingly demonstrated that high  
6 quality was not necessarily associated with high cost.<sup>38</sup> Describing inpatient lung cancer  
7 care in a view that its value is directly proportional to outcomes and inversely  
8 proportional to costs helps in guiding quality improvement by either better outcomes  
9 and/or lower costs.<sup>39</sup> The study calculates and compares the collective costs and  
10 effectiveness of different RIC pathways as a whole and thus informs coordinated  
11 inpatient care episodes and procedures at different time points and hospitals. The study  
12 enables RCER estimation for specific guideline recommended procedures (GRPs) using  
13 various combinations of real and uncontrollable RIC procedures as the reference and thus  
14 enhances understanding and application of GRPs established through well-controlled  
15 studies in routine practice contexts.  
16  
17  
18  
19  
20

21 The study also has limitations. The first limit concerns data reliability. Although the  
22 majority of data are extracted from RIC records kept at hospitals, the study uses self-  
23 reported data about quality of life and inpatient, outpatient and home care. Self-reports  
24 are prone to various biases including recall problems particularly among the elderly, over  
25 or under reporting by the respondents for reasons like perceived expectations from the  
26 researchers or for fearing of potential worries or distress. These biases may be reduced to  
27 a minimum in our study by means of interviewer training, use of chorological recall and  
28 probing techniques, and cross-checks of findings from patient interviews, health  
29 insurance database and hospital records. More importantly, the study uses EQ-5D-5L in  
30 assessing quality of life. It has already been tested with adequate reliability both  
31 internationally and in China. Regarding non-hospitalized care, the study asks only simple  
32 questions about what kind of care the patients have experienced and when and for how  
33 long. These questions are relatively memorable and easy to answer. The second limit  
34 relates to selective study content. The study considers only inpatient care; while patients  
35 may use various self-treatment and outpatient treatment in addition to inpatient care.<sup>40 41</sup>  
36 Inpatient and non-inpatient treatment may substitute each other to some extent. These  
37 may result in under-estimation of the effectiveness of RIC procedures. Fortunately, this  
38 under-estimation may be offset to a large extent by treating non-hospital care as  
39 confounders and the study data to be collected allow this exercise. Third, the study  
40 considers only direct costs rather than full costs taking both direct and indirect costs into  
41 consideration. In addition, different hospitals use different equipment, reagents and  
42 medicines. Their quality of case records may also vary substantially. These raise  
43 compatibility concerns in pooling data from different hospitals together and performing  
44 aggregate analysis. Finally, readers may raise concerns about representativeness of  
45 inpatients to the larger cancer patients. Hospitalization rates documented from other  
46 countries vary greatly;<sup>42</sup> while similar data from China are scarce. Our estimation, using  
47 the dataset of the last province-wide Household Health Survey of Anhui, of the  
48  
49  
50  
51  
52  
53  
54  
55  
56  
57  
58  
59  
60

1  
2  
3 proportion of lung cancer patients who had been admitted to hospitals at least once was  
4 as high as 89%.<sup>43</sup>  
5

## 6 7 **Competing interests**

8  
9 The authors declare no competing interests.  
10

## 11 12 **Authors' contributions**

13  
14 XS and MD contributed equally in conceiving this project, facilitating protocol and  
15 instrument development, and drafting this manuscript. RF, ML, PZ and TJ are kore  
16 researchers for cost estimation, record extraction, follow up survey and data analysis  
17 respectively. DW provided expertise for overall design of the study, and revised and  
18 finalized the manuscript. All authors have read and approved the final submission.  
19  
20

## 21 22 **Acknowledgements**

23  
24 Development of the primitive protocol was supported by the Natural Science Foundation  
25 of China (grant number: 81172201). Refinement and implementation of the protocol is  
26 lead and supported by Collaboration Center for Cancer Control of Anhui Medical  
27 University, Anhui and Luan Center for Diseases Control and Prevention.  
28  
29

## 30 31 **References**

- 32  
33  
34 1. McErlean A, Ginsberg MS. Epidemiology of lung cancer. *Semin Roentgenol* 2011;46  
35 (3):173-7.  
36 2. World Health Organization. GLOBOCAN 2012: Estimated Cancer Incidence,  
37 Mortality and Prevalence Worldwide in 2012. <http://globocan.iarc.fr/Default.aspx>.  
38 3. Kong J, Xu F, He M, Chen K, et al. The incidence of lung cancer by histological type:  
39 a population-based study in Tianjin, China during 1981-2005. *Respirology*  
40 2014;19(8):1222-8.  
41 4. Woodard GA, Jablons DM. The Latest in Surgical Management of Stage IIIA Non-  
42 Small Cell Lung Cancer: Video-Assisted Thoracic Surgery and Tumor Molecular  
43 Profiling. *Am Soc Clin Oncol Educ Book* 2015;35:e435-41.  
44 5. Grunenwald DH. The role of surgery in non-small-cell lung cancers. *Ann Oncol*  
45 2005;16 Suppl 2:ii220-2.  
46 6. Ricardi U, Badellino S, Filippi AR. Stereotactic radiotherapy for early stage non-small  
47 cell lung cancer. *Radiat Oncol J.* 2015;33(2):57-65.  
48 7. Mangal S, Gao W, Li T1, Zhou QT. Pulmonary delivery of nanoparticle chemotherapy  
49 for the treatment of lung cancers: challenges and opportunities. *Acta Pharmacol Sin.*  
50 2017. doi: 10.1038/aps.2017.34.  
51 8. Khan I, Morris S, Hackshaw A, et al. Cost-effectiveness of first-line erlotinib in  
52 patients with advanced non-small-cell lung cancer unsuitable for chemotherapy. *BMJ*  
53 *Open* 2015; 5(7):e006733.  
54  
55  
56  
57  
58  
59

- 1  
2  
3 9. Garon EB, Ciuleanu TE, Arrieta O, et al. Ramucirumab plus docetaxel versus placebo  
4 plus docetaxel for second-line treatment of stage IV non-small-cell lung cancer after  
5 disease progression on platinum-based therapy (REVEL): a multicentre, double-blind,  
6 randomised phase 3 trial. *Lancet* 2014;384(9944):665-73.
- 7  
8 10. Spigel DR, Luft A, Depenbrock H, et al. An Open-Label, Randomized, Controlled  
9 Phase II Study of Paclitaxel-Carboplatin Chemotherapy With Necitumumab Versus  
10 Paclitaxel-Carboplatin Alone in First-Line Treatment of Patients With Stage IV  
11 Squamous Non-Small-Cell Lung Cancer. *Clin Lung Cancer* 2017; pii: S1525-  
12 7304(17)30045-1.
- 13 11. Stinchcombe TE. The Use of EGFR Tyrosine Kinase Inhibitors in EGFR Wild-Type  
14 Non-Small-Cell Lung Cancer. *Curr Treat Options Oncol* 2016; 17(4):18.
- 15 12. Ahmed HZ, Liu Y, O'Connell K, et al. Guideline-concordant Care Improves Overall  
16 Survival for Locally Advanced Non-Small-cell Lung Carcinoma Patients: A National  
17 Cancer Database Analysis. *Clin Lung Cancer* 2017; pii: S1525-7304(17)30114-6.
- 18 13. Nadpara P, Madhavan SS, Tworek C. Guideline-concordant timely lung cancer care  
19 and prognosis among elderly patients in the United States: A population-based study.  
20 *Cancer Epidemiol*; 39(6):1136-44.
- 21 14. Hinde S, McKenna C, Whyte S, et al. Modelling the cost-effectiveness of public  
22 awareness campaigns for the early detection of non-small-cell lung cancer. *Br J*  
23 *Cancer* 2015; 113(1):135-41.
- 24 15. Kumar G, Woods B, Hess LM, et al. Cost-effectiveness of first-line induction and  
25 maintenance treatment sequences in non-squamous non-small cell lung cancer  
26 (NSCLC) in the U.S. *Lung Cancer* 2015. pii: S0169-5002(15)00281-0.
- 27 16. Warren JL, Harlan LC, Trimble EL, et al. Trends in the receipt of guideline care and  
28 survival for women with ovarian cancer: A population-based study. *Gynecol Oncol*  
29 2017;145(3):486-492.
- 30 17. Jennens RR, Giles GG, Fox RM. Increasing underrepresentation of elderly patients  
31 with advanced colorectal or non-small-cell lung cancer in chemotherapy trials. *Int*  
32 *Med J* 2006;36: 216e220.
- 33 18. Murthy VH, Krumholtz HM, Gross CP. Participation in cancer clinical trials; race-,  
34 sex-, and age-based disparities. *JAMA* 2004;22(291): 2720-2726.
- 35 19. Tong Y, Huang C, Zhang J. A novel EGFR-TKI inhibitor (cAMP-H3BO3 complex)  
36 combined with thermal therapy is a promising strategy to improve lung cancer  
37 treatment outcomes. *Oncotarget*. Published Online First: 04 May 2017.doi:  
38 10.18632/oncotarget.17628.
- 39 20. National Health and Family Planning Commission of China. Guideline for Chinese  
40 primary lung cancer diagnosis and treatment (2015 edition). *Chinese Journal of*  
41 *Oncology* 2015.37(1):67-78.
- 42 21. Xing Wang, Shi Yan, Yaqi Wang, et al. Surgical Quality Surveillance and Sustaining  
43 Improvement of Lung Cancer Surgery Based On Standard Operation  
44 Procedure(SOP) : Experience of Single Surgical Team. *Chinese Journal of Lung*  
45 *Cancer*; 20(4): 253-258.
- 46 22. Jackman DM, Zhang Y, Dalby C, et al. Cost and Survival Analysis Before and After  
47 Implementation of Dana-Farber Clinical Pathways for Patients With Stage IV Non-  
48 Small-Cell Lung Cancer. *J Oncol Pract* 2017;13(4):e346-e352.
- 49 23. Okita A, Yamashita M, Abe K, et al. Variance analysis of a clinical pathway of  
50 video-assisted single lobectomy for lung cancer. *Surg Today* 2009;39(2):104-9.

- 1
  - 2
  - 3
  - 4
  - 5
  - 6
  - 7
  - 8
  - 9
  - 10
  - 11
  - 12
  - 13
  - 14
  - 15
  - 16
  - 17
  - 18
  - 19
  - 20
  - 21
  - 22
  - 23
  - 24
  - 25
  - 26
  - 27
  - 28
  - 29
  - 30
  - 31
  - 32
  - 33
  - 34
  - 35
  - 36
  - 37
  - 38
  - 39
  - 40
  - 41
  - 42
  - 43
  - 44
  - 45
  - 46
  - 47
  - 48
  - 49
  - 50
  - 51
  - 52
  - 53
  - 54
  - 55
  - 56
  - 57
  - 58
  - 59
  - 60
24. Duggan KJ, Descallar J, Vinod SK. Application of Guideline Recommended Treatment in Routine Clinical Practice: A Population-based Study of Stage I-IIIb Non-small Cell Lung Cancer. *Clin Oncol (R Coll Radiol)* 2016;28(10):639-47.
25. Heins MJ, de Jong JD, Spronk I, et al. Adherence to cancer treatment guidelines: influence of general and cancer-specific guideline characteristics. *Eur J Public Health* 2016; pii: ckw234. doi: 10.1093/eurpub/ckw234.
26. Yang S, Cui M, Li HY, et al. Meta-analysis of the effectiveness of Chinese and Western integrative medicine on medium and advanced lung cancer. *Chin J Integr Med* 2012;18(11):862-7.
27. XX L, YW Chen, KS Bi. Resolution of Two-way Recerral Problem in China by Studying British National Health Service System. *Chinese General Practice* 2013; 31(16):2926-29.
28. Y Sun, J Wu, SB Xie, et al. Evaluation of the medical staff clinical pathway adherence: Based on comparison of before and after provider payment reform in Henan Province. *Chinese Journal of Health Policy* 2013;6(5):37-43.
29. Henry SG, Ness RM, Stiles RA, Shintani AK, Dittus RS. A cost analysis of colonoscopy using microcosting and time-and-motion techniques. *J Gen Intern Med* 2007, 22(10):1415-21.
30. Cressman S, Lam S, Tammemagi MC, et al. Resource utilization and costs during the initial years of lung cancer screening with computed tomography in Canada. *J Thorac Oncol* 2014, 9(10):1449-58.
31. Khan I, Morris S, Pashayan N, et al. Comparing the mapping between EQ-5D-5L, EQ-5D-3L and the EORTC-QLQ-C30 in non-small cell lung cancer patients. *Health Qual Life Outcomes* 2016, 14:60.
32. SN York. Incremental Cost-Effectiveness Ratio. *Handbook of Disease Burdens and Quality of Life Measures* 2010: 4235-4235.
33. National Bureau of Statistics of China. China Statistical Yearbook 2016. <http://www.stats.gov.cn/tjsj/ndsj/2016/indexch.htm> (accessed 1 July 2017).
34. Statistics Bureau of Anhui Province. Statistical yearbook of Anhui Province in 2016. [http://www.ahtjj.gov.cn/tjj/web/tjnj\\_view.jsp?strColId=13787135717978521&\\_index=1#](http://www.ahtjj.gov.cn/tjj/web/tjnj_view.jsp?strColId=13787135717978521&_index=1#) (accessed 1 July 2017).
35. Treeage: Hollman C, Paulden M, Pechlivanoglou P, et al. A Comparison of Four Software Programs for Implementing Decision Analytic Cost-Effectiveness Models. *Pharmacoeconomics* 2017. doi: 10.1007/s40273-017-0510-8.
36. Darling G, Malthaner R, Dickie J, et al. Quality indicators for non-small cell lung cancer operations with use of a modified Delphi consensus process. *Ann Thorac Surg* 2014;98(1):183-90.
37. Fisher A, Manicavasagar V, Sharpe L, et al. A Qualitative Exploration of Clinician Views and Experiences of Treatment Decision-Making in Bipolar II Disorder. *Community Ment Health J*. Published Online First: 19 Jan 2017. doi: 10.1007/s10597-016-0077-4.
38. Wennberg JE, Fisher ES. Finding high quality, efficient providers for value purchasing: cohort methods better than methods based on events. Finding high quality, efficient providers for value purchasing: cohort methods better than methods based on events. *Med Care* 2002,40(10):853-5.
39. Chen LW, Wilson FA, Gregg A, et al. Measuring the Cost and Value of Quality Improvement Initiatives for Local Health Departments. *J Public Health Manag Pract*.



1  
2  
3 Published Online First: 1 Mar 2017. doi: 10.1097/PHH.0000000000000552.

- 4 40. O' Regan P, Hegarty J. The importance of self-care for fatigue amongst patients  
5 undergoing chemotherapy for primary cancer. *Eur J Oncol Nurs* 2017;28:47-55.  
6 41. Dionne-Odom JN, Demark-Wahnefried W, Taylor RA, et al. The self-care practices  
7 of family caregivers of persons with poor prognosis cancer: differences by varying  
8 levels of caregiver well-being and preparedness. *Support Care Cancer* 2017;  
9 25(8):2437-2444.  
10 42. Prince RM, Atenafu EG, Krzyzanowska MK. Hospitalizations During Systemic  
11 Therapy for Metastatic Lung Cancer: A Systematic Review of Real World vs Clinical  
12 Trial Outcomes. *JAMA Oncol* 2015, 1(9):1333-9.  
13 43. Zhao T, Cheng J, Chai J, et al. Inpatient care burden due to cancers in Anhui, China:  
14 a cross-sectional household survey. *BMC Public Health* 2016, 16:308.  
15  
16  
17  
18  
19  
20  
21  
22  
23  
24  
25  
26  
27  
28  
29  
30  
31  
32  
33  
34  
35  
36  
37  
38  
39  
40  
41  
42  
43  
44  
45  
46  
47  
48  
49  
50  
51  
52  
53  
54  
55  
56  
57  
58  
59  
60

1  
2  
3 Figure 1 Schematic structure of sample multivariate models to be built  
4

5 Figure 2 Simulated cost by selected socio-demographics and clinical characteristics  
6 (TC=total cost; KRMB=1000 Chinese yuan)  
7

8 Figure 3 Anticipated “procedure-outcome” tree of inpatient lung cancer care (Tx = the x<sup>th</sup>  
9 round of hospitalization; Cx = the x<sup>th</sup> combination of clinical procedures; Px = possibility  
10 of using the x<sup>th</sup> combinations of clinical procedures; Ox = the x<sup>th</sup> patient outcome  
11 index/indicator)  
12  
13  
14  
15  
16  
17  
18  
19  
20  
21  
22  
23  
24  
25  
26  
27  
28  
29  
30  
31  
32  
33  
34  
35  
36  
37  
38  
39  
40  
41  
42  
43  
44  
45  
46  
47  
48  
49  
50  
51  
52  
53  
54  
55  
56  
57  
58  
59  
60

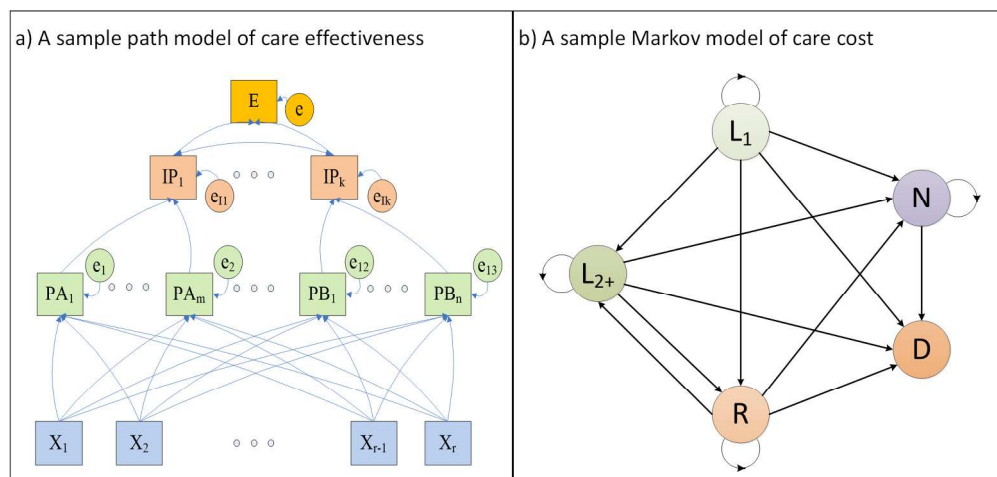

Figure 1 Schematic structure of sample multivariate models to be built/ X=independent variables; PA or PB=domain A or proximate indicators of effectiveness; IP=index of proximate variables; e=systematic error; and E= effectiveness, e.g., overall survival, QALYs; L<sub>1</sub>=first line treatment; L<sub>2+</sub>=second or third line treatment; R=remission; N=no active treatment; D=death.

188x88mm (300 x 300 DPI)

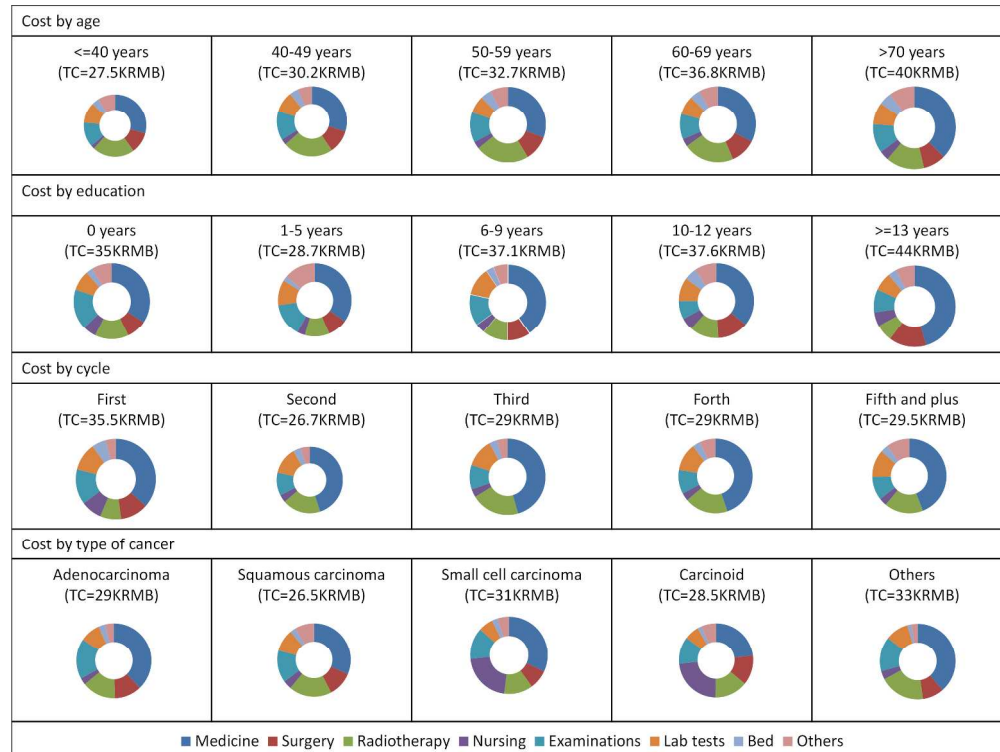

Figure 2 Simulated cost by selected socio-demographics and clinical characteristics (TC=total cost; KRMB=1000 Chinese yuan)

249x187mm (300 x 300 DPI)

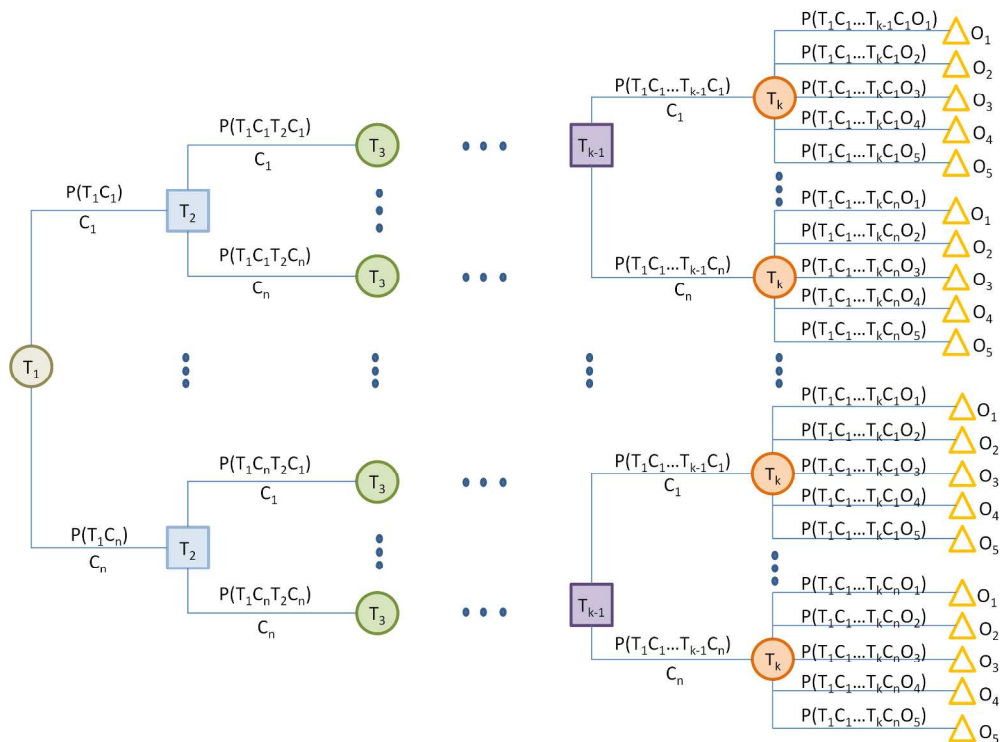

Figure 3 Anticipated "procedure-outcome" tree of inpatient lung cancer care ( $T_x$  = the  $x^{\text{th}}$  round of hospitalization;  $C_x$  = the  $x^{\text{th}}$  combination of clinical procedures;  $P_x$  = possibility of using the  $x^{\text{th}}$  combinations of clinical procedures;  $O_x$  = the  $x^{\text{th}}$  patient outcome index/indicator)

242x183mm (300 x 300 DPI)

# BMJ Open

## Pathways and cost-effectiveness of routine lung cancer inpatient care in rural Anhui, China: a retrospective cohort study protocol

|                                 |                                                                                                                                                                                                                                                                                                                                                                                                                                                                                                                                                                                      |
|---------------------------------|--------------------------------------------------------------------------------------------------------------------------------------------------------------------------------------------------------------------------------------------------------------------------------------------------------------------------------------------------------------------------------------------------------------------------------------------------------------------------------------------------------------------------------------------------------------------------------------|
| Journal:                        | <i>BMJ Open</i>                                                                                                                                                                                                                                                                                                                                                                                                                                                                                                                                                                      |
| Manuscript ID                   | bmjopen-2017-018519.R4                                                                                                                                                                                                                                                                                                                                                                                                                                                                                                                                                               |
| Article Type:                   | Protocol                                                                                                                                                                                                                                                                                                                                                                                                                                                                                                                                                                             |
| Date Submitted by the Author:   | 19-Jan-2018                                                                                                                                                                                                                                                                                                                                                                                                                                                                                                                                                                          |
| Complete List of Authors:       | Shen, XingRong; Anhui Medical University School of Health Service Management<br>Diao, MengJie; Anhui Medical University School of Health Service Management<br>Lu, ManMan ; Anhui Medical University School of Health Service Management<br>Feng, Rui; Anhui Medical University, Library Department of Literature Retrieval and Analysis<br>Zhang, PanPan ; Anhui Medical University School of Health Service Management<br>Jiang, Tao ; Anhui Medical University School of Health Service Management<br>Wang, DeBin; Anhui Medical University, School of Health Services Management |
| <b>Primary Subject Heading</b>: | Health economics                                                                                                                                                                                                                                                                                                                                                                                                                                                                                                                                                                     |
| Secondary Subject Heading:      | Health informatics                                                                                                                                                                                                                                                                                                                                                                                                                                                                                                                                                                   |
| Keywords:                       | cost effectiveness, lung cancer, inpatient care, retrospective study, China                                                                                                                                                                                                                                                                                                                                                                                                                                                                                                          |
|                                 |                                                                                                                                                                                                                                                                                                                                                                                                                                                                                                                                                                                      |

SCHOLARONE™  
Manuscripts

# Pathways and cost-effectiveness of routine lung cancer inpatient care in rural Anhui, China: a retrospective cohort study protocol

XingRong Shen\*, MengJie Diao\*, ManMan Lu, Rui Feng, PanPan Zhang, Tao Jiang, Debin Wang<sup>#</sup>

**Corresponding author: Debing Wang.**

Post address: 81 Meishan Road, Hefei, Anhui, China. 230032.

Email: [dbwang@vip.sina.com](mailto:dbwang@vip.sina.com)

Telephone: (0086) 5116395

**XingRong Shen:**

School of Health Service Management, Anhui Medical University, Hefei, Anhui, China.

**MengJie Diao:**

School of Health Service Management, Anhui Medical University, Hefei, Anhui, China.

**ManMan Lu:**

School of Health Service Management, Anhui Medical University, Hefei, Anhui, China.

**Rui Feng:**

Department of Literature Review and Analysis, Library of Anhui Medical University, Hefei, Anhui, China.

**PanPan Zhang:**

School of Health Service Management, Anhui Medical University, Hefei, Anhui, China.

**Tao Jiang:**

School of Health Service Management, Anhui Medical University, Hefei, Anhui, China.

**Word count: 4085**

## ABSTRACT

**Introduction:** Routine inpatient care (RIC) for cancer patients forms various pathways of clinical procedures. Although most individual procedures comprising the pathways have been tested via clinical trials, little is known about the collective cost and effectiveness of the pathways as a whole. This study aims at exploring RIC pathways for lung cancer patients from rural Anhui, China and their determinants and economic impacts.

**Methods and analysis:** The study adopts a retrospective cohort design and proceeds in 5 steps. Step 1 defines 4 main categories of study variables including clinical procedures, direct cost and effectiveness of procedures, and factors affecting use of these procedures and their cost and effectiveness. Step 2 selects a cohort of 5000 lung cancer patients diagnosed between July 1, 2014 and June 30, 2015 from rural Anhui by clustered-random sampling. Step 3 retrieves the records of all the inpatient care episodes due to the lung cancer and extracts data about RIC procedures, proximate variables (e.g., Karnofsky performance status, lung function score) of patient outcomes and related factors (e.g., stage of cancer, age, gender) by 2 independent clinician researchers using a web-based form. Step 4 estimates the direct cost of each of the RIC procedures using micro-costing and collects data about ultimate patient outcomes (survival and progression-free survival) through a follow up survey of patients and/or their close relatives. Step 5 analyzes data collected and explores pathways of RIC procedures and their relations with patient outcomes, costs, cost-effect ratios and a whole range of clinical and socio-demographic factors using multivariate regression and path models.

**Ethics and dissemination:** The study protocol has been approved by authorized ethics committee of Anhui Medical University (reference number: 20170312). Findings from the study will be disseminated through conventional academic routes such as peer-reviewed publications and presentations at regional, national and international conferences.

### Trial registry

ISRCTN25595562

**Key words:** cost effectiveness, lung cancer, inpatient care, retrospective study, China



## Strengths and limitations of this study

- The study adopts a retrospective cohort study design involving a large representative sample of community patients;
- It provides data for determining the cost-effectiveness of different treatment approaches as a whole rather than individual procedures;
- It informs our understanding of routine inpatient lung cancer care for rural Chinese, a huge yet understudied population;
- It extracts data from routine records kept at different hospitals and thus suffers from discrepancies in performances and data qualities.

## Introduction

Lung cancer has been the most common cancer in the world for several decades.<sup>1</sup> Estimated new cases of the disease was 1.8 million in 2012 (12.9% of all cancers), 58% of which occurred in less developed regions. It was also the most common cause of death from cancer worldwide, being responsible for nearly one in five (1.59 million in absolute number) of the total.<sup>2</sup> In China, lung cancer incidence displayed a slight decreasing trend in the past few years, particularly for males. However, it is still the top first cancer for males and second for females, accounting for 25.2% of all new cancer cases and 29.5% of all cancer deaths in 2012.<sup>3</sup>

Routine inpatient care (RIC) for lung cancer consists of a combination of procedures. Patients with possible lung cancer need a detailed history and physical examination first. Then they should undergo posterior-anterior and lateral chest radiographs as well as CT scans of the chest and abdomen. In order to further confirm and determine stage and histology of the lesion, other diagnostic methods needed include whole-body fluoro-deoxy-glucose positron emission tomography, endoscopic ultrasound, sputum cytology, fine-needle aspiration, bronchoscopy etc. Following diagnosis of lung cancer, the patients proceed with combined-modality therapies depending on stage of the disease and co-morbidities and complications. Historically, surgery provides the best chance for cure for patients whose lung cancers are limited to the hemithorax and can be totally encompassed by excision.<sup>4 5</sup> Surgery has been generally used in combination with external-beam radiotherapy for control of the primary tumor and regional lymphatics.<sup>6</sup> In addition, chemotherapy has also been advocated as an integral part of combined modality approaches to earlier stages of disease.<sup>7 8</sup> For unselected advanced none-small cell lung cancer, platinum-based combinations have become the standard of care; while cisplatin- or carboplatin-based doublets are standard for patients with stage IV disease.<sup>9 10</sup> More recently, EGFR tyrosine kinase inhibitors have been introduced in second- and third-line treatment of advanced disease and in first-line treatment for selected patients.<sup>11</sup>

Given the complex procedures, ensuring quality RIC for lung cancer patients has been most challenging and guidelines are widely used in addressing this challenge. Numerous

1  
2  
3 studies have documented positive relations between compliance with guidelines and  
4 patient outcomes.<sup>12 13</sup> However, researchers have also raised concerns about guidelines.  
5 One of such concerns refers to lack of adequate consideration of costs. Most clinical  
6 procedures not only affect disease outcomes but also incur considerable costs.<sup>14 15</sup> Yet  
7 guidelines are based on trials focused primarily on effectiveness (e.g., survival) with little  
8 attention being paid to economic consequences.<sup>16</sup> Another concern relates to  
9 incompatible population between clinical trials and RIC. Clinical trials on which  
10 guidelines are based use highly selective populations; while RIC serves a general lung  
11 cancer population with different age, performance status and comorbidities.<sup>17 18</sup> A third  
12 concern revolves uncertain interactions between procedures. Although most individual  
13 guideline recommended procedures (GRPs) have established evidences, they are not used  
14 in isolation but in conjunction with others forming various clinical combinations. Efforts  
15 systematically assessing and comparing these combinations are scarce.<sup>19-22</sup> A fourth  
16 concern originates from varied compliance with guidelines since RIC often deviates  
17 substantially from guidelines.<sup>23 24</sup> The cost-effectiveness of these “substandard” or mixed  
18 combinations of procedures (partly from guidelines, partly from experiences of  
19 individual clinicians) falls far from well-understood.<sup>25</sup> These all point to a clear need for  
20 evaluating RIC even though guidelines are widely available.  
21  
22  
23  
24  
25  
26

27 All the above concerns are most pertinent to China. First, China has a unique “dual”  
28 medical care system in which patients often receive western medicine and traditional  
29 Chinese medicine simultaneously or in turn.<sup>26</sup> Second, China lacks coordinated referral  
30 and follow up mechanisms and cancer patients often moves freely from one hospital to  
31 another for different rounds of inpatient cancer care.<sup>27</sup> This makes it hard for clinicians in  
32 leveraging different inpatient care episodes at different time points and hospitals into  
33 continuous and synergetic service. Third, China has strong socio-cultural norms and  
34 financial incentives that hinder cost control and guideline compliance.<sup>28</sup>  
35  
36  
37  
38

## 39 **Study aims**

40  
41  
42 This study aims at identifying main pathways of RIC procedures for lung cancer patients  
43 from rural Anhui, China and exploring determinants of the pathways and their economic  
44 impacts. Specific questions to be addressed include: a) what combinations of diagnosis  
45 and treatment procedures (or pathways for short) an individual patient may experience  
46 during all his/her hospitalization episodes due to lung cancer-related problems; b) which  
47 are the most and least frequent pathways; c) what determines the flow among these  
48 pathways; d) which are the most and least cost-effective pathways in relation to the other  
49 pathways; and e) what factors are associated with the relative cost-effectiveness.  
50  
51  
52

53 The above “pathways” of inpatient care means combinations of diagnosis and treatment  
54 procedures an individual patient may experience during all his/her hospitalization  
55 episodes due to lung cancer-related problems. Suppose a lung cancer patient experienced  
56  
57  
58  
59  
60

1  
2  
3 6 times/rounds of hospitalized care and during each of these hospitalization episodes, the  
4 patient underwent several diagnosis and treatment procedures, all these procedures form  
5 the “pathway” of this particular patient. It is worth noting that findings of the cost-  
6 effectiveness analysis are exploratory rather than implying that they are of sufficient robustness  
7 to be used to inform policy changes.  
8  
9

## 10 **Methodology**

### 11 **Identification of procedures**

12  
13 The study uses a self-designed and web-based data extraction form in identifying major  
14 clinical procedures described in any RIC record under concern. The form lists all major  
15 RIC procedures under two main domains, i.e., diagnostic procedures (e.g., chest X-ray,  
16 chest CT, neck ultrasonography) and treatment procedures (e.g., surgical therapy,  
17 chemotherapy, psycho-behavioral intervention).  
18  
19  
20  
21

### 22 **Estimation of costs**

23 The study estimates overall and categorical costs (direct costs only) for each of the RIC  
24 procedures (e.g., lung function examination, computed tomography, white blood cell  
25 count) identified above using micro-costing techniques.<sup>29 30</sup> Taking the example of lung  
26 function examination, categorical costs include costs on personnel, equipment, materials,  
27 regents and others needed in completing the examination; while overall cost of the  
28 procedure equals the sum of all these categorical costs. In addition, the study also  
29 calculates grand total cost on individual inpatient by adding up the overall costs on all the  
30 clinical procedures he/she has received.  
31  
32  
33  
34

### 35 **Measurement of effectiveness**

36 The study uses both proximal variables of outcomes (PV) and ultimate outcome (UO)  
37 measures of effectiveness of RIC procedures. The UO indicators derive from a follow up  
38 survey about 2 years and half after the first hospitalization and include overall survival  
39 (OS), progression-free survival (PFS), quality of life (QoL), and quality adjusted life  
40 years (QALYs). Here, QoL is assessed using the widely recognized EQ-5D-5L  
41 instrument.<sup>31</sup>  
42  
43  
44

45 The PV measures come from RIC records and include Eastern Cooperative Oncology  
46 Group (ECOG), Karnofsky performance status (KPS) and compiled scores of: a)  
47 symptoms (e.g., chronic cough, chest pain, wasting syndrome); b) lung functions (e.g.,  
48 forced vital capacity, forced one second expiratory volume), c) image findings (e.g.,  
49 number of nodules identified in the lung, size of the largest nodules, presence of pleura  
50 or pericardial effusion). Each of these domain specific PV scores equals weighted sum of  
51 all sub-indicators within the domain. For example, the compiled score of “lung functions”  
52 equals the sum of weighted values of forced vital capacity, forced one second expiratory  
53 volume etc. Here the weights come from the coefficients of multivariate regression  
54  
55  
56  
57  
58  
59  
60

1  
2  
3 modeling using an UO indicator (e.g., OS) as the dependent variable; while forced vital  
4 capacity, forced one second expiratory volume etc. as the independent variables; and  
5 stage of disease, age, gender and others as the confounding variables.  
6

### 7 **Calculation of cost-effectiveness**

8  
9 The study adopts relative cost-effectiveness ratios (RCERs) as the main indicators for  
10 measuring cost-effectiveness. Here RCER is defined by the difference in cost between  
11 two selected sets of RIC procedures, divided by the difference in their effectiveness.  
12 More specifically,  $RCER = (C_{r+x} - C_r)/(E_{r+x} - E_r)$ , where  $C_r$  and  $E_r$  is the cost and  
13 effectiveness in the reference group and  $C_{r+x}$  and  $E_{r+x}$ , the cost and effectiveness in the  
14 group who have underwent all the procedures in the reference group plus x, a specific  
15 procedure under concern.<sup>32</sup> Suppose, x represents a commonly used traditional Chinese  
16 medicine (TCM) which incurs 100 dollars; while r, a typical combination of diagnosis  
17 and treatment procedures without the TCM. The combination without the TCM costs  
18 1000 dollars and the survival time of patients who have adopted this combination is 1.5  
19 years on average; while the same figure for patients who have used the same combination  
20 plus the TCM is 1.51. Then the  $C_{r+x} = 1000 + 100 = 1100$  dollars and the RCER of  
21 the TCM =  $(1100-100)/(1.51-1.5)=10000$  dollars per life year saved. Similarly,  $RCER =$   
22  $(C_{r+x}/E_{r+x})/(C_r/E_r) = (1100/1.51)/(1000/1.50) = 1.09$ .  
23  
24  
25  
26  
27

### 28 **Identification of influencing factors**

29  
30 The study also extracts, from RIC records, data about patient factors commonly believed  
31 to be linked with disease progression, treatment response and outcomes and utilization of  
32 RIC procedures. These include: a) socio-demographics (e.g., age, gender, body height  
33 and weight, education, employment, marital status, medical insurance); b) risk behaviors  
34 and histories (e.g., smoking, alcohol drinking, history of cancer among family members);  
35 c) historical and biological test findings (e.g., value of ALK, KRAS, EGFR, PDL1, CEA,  
36 CA125, proGRP); d) comorbidities and complications (e.g., presence of superior vena  
37 cava syndrome, brain metastases) and stage of disease. Here, disease staging uses TNM  
38 system and this staging will be treated as the most important factor throughout the data  
39 analysis especially in its effects on the flow of different pathways and their RCER.  
40  
41  
42  
43

### 44 **Selection of participants**

45 The study is implemented in Anhui, an inland province located in middle and east China.  
46 It has a population of 61.4 million and its per capita GDP and income rank in the middle  
47 (the 14<sup>th</sup>) among all provinces in the nation.<sup>33 34</sup> Its social, cultural and economic  
48 background is representative of over 80% of the whole population in China.<sup>33 34</sup> The  
49 province has 68 rural counties and each of them divides into 10 to 20 townships.  
50 Selection of participating counties, townships, patients and RIC case records uses a  
51 clustered random sampling which proceeds in 5 steps. Step 1 classifies all the counties in  
52 Anhui into southern, northern and middle areas. Step 2 randomly selects 3 counties from  
53 each of these areas (12 counties in total). Step 3 randomly draws 4 townships from each  
54  
55  
56  
57  
58  
59  
60

of the counties selected (48 townships in total). Step 4 searches the provincial reimbursement database of the New Rural Cooperative Medical System (NRCMS) and identifies all the patients within the selected townships who had been first diagnosed with primary lung cancer during July 1, 2015 and June 30, 2016. Step 5 searches the database again for all episodes of hospitalization due to the lung cancer for the patients identified in step 4. NRCMS covers 98% of the rural residents and the estimated number of patients and admission episodes is about 5,000 and 25,000 respectively.

The above sample size was determined by our study purpose of building multivariate models of factors affecting the flow among and RCER of specific RIC pathways. Lung cancer patients generally receive 4 to 6 rounds of inpatient care. Given the various diagnostic and treatment procedures available, there are hundreds of potential RIC pathways (combinations of diagnosis and treatment procedures from the first to the last round of RIC). We plan to group these pathways into manageable (around 20) categories depending on the resultant distribution of the actual pathways and we aim to enter 20-30 factors into the multivariate models for each of these categorical pathways. Based on these pre-conditions and that the sample size of a multi-variable model should generally be 10 times the number of independent variables, we need 250 patients for each pathway. This translates into 5000 patients in total.

### **Data collection**

The study obtains data through follow-up survey and data extraction. The follow-up survey applies to all the lung cancer patients identified above. It solicits information about the patient's: a) disease progression (i.e., died, alive with or without progression); b) if died, date of death; c) additional admissions due to the lung cancer not included in the above mentioned NRCMS database. The survey uses a short structured questionnaire. Administration of the questionnaire starts with a telephone interview (of the patient under concern or his/her close relatives for up to 5 time attempts) followed by a face-to-face interview (of the same respondents for up to 2 attempts) if the telephone contacts have failed. The recruitment strives to reach over 85% rate of participation. The researchers are trained to record reasons of attrition for each of the patients they have lost so as to allow for assessing potential biases. The data extraction applies to records of all the hospital admission episodes identified via the NRCMS database and the follow up survey. It uses a structured web-based form and extracts data about the clinical procedures, costs, effectiveness and influencing factors described above. Two experienced clinicians on care of lung cancer perform the data extraction. They visit (on one-by-one base) all the relevant hospitals, ask for permission to examine the full records and fill the worksheet independently first followed by discussions, if applicable, to solve discordances.

### **Data analysis**

The data collected above allow a variety of descriptive and multivariate analysis concerning the costs and effectiveness of RIC. The effectiveness analysis comprises all

1  
2  
3 the UO indicators including progression free survival, overall survival, quality of life and  
4 DALYs. For each of these UO indicators, the analysis will produce: a) estimation of  
5 average rates or values with 95% confidence intervals at different time points after first  
6 diagnosis by disease stage, PV indicators, RIC pathways, non-hospital care categories,  
7 age range etc.; b) multivariate regression models using similar variables as independent  
8 variables; and c) path models using disease stage, RIC pathways, non-hospital care  
9 categories, age range etc. as exogenous, complied PV indices as direct endogenous, and  
10 individual PV indicators as indirect endogenous variables (Figure 1a). Area under ROC  
11 (receiver operating characteristic) curve will be estimated for assessing the predictability  
12 of models using binary classifier as the dependent variable (e.g., models of progression  
13 free survival, overall survival).  
14  
15  
16  
17

18 The cost analysis explores mainly: a) Markov models of mean cost for managing lung  
19 cancer patients (Figure 1b); b) overall and categorical costs on different rounds of  
20 hospitalization by socio-demographic and selected clinical conditions (Figure 2); c)  
21 scatter plot of RIC procedures using the occurrence rate and unit cost of individual  
22 procedures as the coordinates; and d) multivariate regression models of overall and  
23 selected categorical costs using disease stage, PV indicators, RIC pathways, non-hospital  
24 care categories, age range etc. as independent variables.  
25  
26  
27

28 The cost-effectiveness analysis focuses primarily on constructing a pathway tree to help  
29 estimate expected overall and pathway specific cost, effectiveness and identify pathways  
30 with the highest or lowest RCER. The tree consists of different branches of combinations  
31 of RIC procedures starting from the first to the last episode of inpatient care labeled with  
32 estimated costs and possibilities along the pathways and outcomes at the end of the  
33 pathways (Figure 3). Relevance of the pathway tree is tested by means of, for instance,  
34 varying the percentage of patient flowing among the different pathways or the costs of  
35 major diagnostic and treatment procedures consisting the braches and then examining  
36 changes in the ranking of the pathways in terms of relative cost-effectiveness. The  
37 analysis also pays particular attention to identifying as many as comparable pairs of RIC  
38 pathways as possible and calculating RCER accordingly in a hope to uncover potential  
39 pathways of practice, policy and research implications.  
40  
41  
42  
43  
44

45 The pathway tree construction will use TreeAge<sup>35</sup>; while the descriptive and multi-  
46 variate model analysis, SPSS 16. Cases with missing data about a specific item will be  
47 excluded from the analysis involving the item and where applicable, the statistical null  
48 hypothesis is be rejected at the significance level of  $\alpha = 0.05$ .  
49  
50

### 51 **Ethics and dissemination**

52 The study protocol had been reviewed and approved by the Biomedical Ethics  
53 Committee of Anhui Medical University (reference number: 20170312). Participation of  
54 hospitals, patients and their relatives are voluntary and written informed consent is  
55  
56  
57  
58  
59

1  
2  
3 required for all participants. Findings from the study will be disseminated through  
4 conventional academic routes such as peer-reviewed publications and presentations and  
5 regional, national and international conferences.  
6  
7

## 8 **Discussion**

9

10 The study would share the experience of lung cancer care from the rural Chinese  
11 perspective. It is an important sharing of knowledge on population-based lung cancer  
12 care, since most economic evidence comes from Europe and North America. In China,  
13 traditional Chinese medicine is used to complement or replace western medicine. This  
14 results in quite different pathways of lung cancer care that have seldom been well  
15 explored in published literatures. China has a long history of almost no charges being  
16 made for clinical consultations and most patients are used to paying only for medicines,  
17 laboratory tests and equipment-based examinations. This forms a perverse financial  
18 incentive for clinicians to order more sophisticated examinations and tests and to over  
19 prescribing. China's lack of referral and follow up mechanisms also merits particular  
20 attention. As an individual patient changes from one hospital (say for the first round of  
21 treatment) to another (for the second round treatment), he/she may receive different  
22 treatment regimens. Discontinued treatment and follow up may make it hard for  
23 clinicians to base their treatment decisions on observed effects.  
24  
25  
26  
27  
28  
29

30 Perhaps the most noteworthy findings of the current study may be the description of the  
31 pathways of RIC procedures and their economic impacts (Figure 2). These pathways will  
32 provide easily understandable means for estimating and identifying, among others, the  
33 following: a) which pathways or combinations of procedures happen most or least in  
34 routine practice during different rounds of hospitalization for inpatients suffering from  
35 lung cancer in rural China; b) which pathways (from the first to last round of  
36 hospitalization) incur the highest or lowest direct costs; and c) which pathways result in  
37 the best or worst patient outcome in terms of different UO measures. These have  
38 important implications for clinical decision-making as well as policy-making.  
39  
40  
41  
42

43 Another point worth mentioning refers to the links between the domain specific  
44 proximate (PV) indices to key ultimate outcome (UO) indicators (e.g., OS, PFS, QALYs)  
45 generated via a large scale (involving 5000 lung cancer patients) retrospective cohort  
46 study. They provide useful information for clinicians on care of lung cancer patients in  
47 selecting appropriate procedures to achieve optimal collective contributions to UO.<sup>36</sup> At  
48 present, although PV indicators are observed routinely, they are presented to clinicians as  
49 individual indicators rather than compiled indices. Given the large number of PV  
50 indicators involved and the complex relations between RIC procedures and PV indicators  
51 and then UO indicators, it is difficult for practicing clinicians to make balanced decisions  
52 upon their personal experiences.<sup>37</sup>  
53  
54  
55  
56  
57  
58  
59  
60

1  
2  
3 In addition, this study addresses RIC for lung cancer at hospitals in China from a range  
4 of meaningful perspectives. The study reinforces the concepts introduced in the landmark  
5 studies of Fisher et al and Wennberg et al, which convincingly demonstrated that high  
6 quality was not necessarily associated with high cost.<sup>38</sup> Describing inpatient lung cancer  
7 care in a view that its value is directly proportional to outcomes and inversely  
8 proportional to costs helps in guiding quality improvement by either better outcomes  
9 and/or lower costs.<sup>39</sup> The study calculates and compares the collective costs and  
10 effectiveness of different RIC pathways as a whole and thus informs coordinated  
11 inpatient care episodes and procedures at different time points and hospitals. The study  
12 enables RCER estimation for specific guideline recommended procedures (GRPs) using  
13 various combinations of real and uncontrolled RIC procedures as the reference and thus  
14 enhances understanding and application of GRPs established through well-controlled  
15 studies.  
16  
17  
18  
19

20  
21 The study also has limitations. The first limitation concerns data reliability. Although the  
22 majority of data are extracted from RIC records kept at hospitals, the study uses self-  
23 reported data about quality of life and inpatient, outpatient and home care. Self-reports  
24 are prone to various biases including recall problems particularly among the elderly, over  
25 or under reporting by the respondents for reasons like perceived expectations from the  
26 researchers or for fearing of potential worries or distress. These biases may be reduced to  
27 a minimum in our study by means of interviewer training, use of chorological recall and  
28 probing techniques, and cross-checks of findings from patient interviews, health  
29 insurance database and hospital records. More importantly, the study uses EQ-5D-5L in  
30 assessing quality of life. It has already been tested with adequate reliability both  
31 internationally and in China. Regarding non-hospitalized care, the study asks only simple  
32 questions about what kind of care the patients have experienced and when and for how  
33 long. These questions are relatively memorable and easy to answer. The second  
34 limitation relates to selective study content. The study considers only inpatient care;  
35 while patients may use various self-treatment and outpatient treatment in addition to  
36 inpatient care.<sup>40 41</sup> Inpatient and non-inpatient treatment may substitute each other to  
37 some extent. These may result in under-estimation of the effectiveness of RIC procedures.  
38 Fortunately, this under-estimation may be offset to a large extent by treating non-hospital  
39 care as confounders and the study data to be collected allow this exercise. Third, the  
40 study considers only direct costs rather than full costs taking both direct and indirect  
41 costs into consideration. In addition, different hospitals use different equipment, reagents  
42 and medicines. Their quality of records may also vary substantially. These raise  
43 compatibility concerns in pooling data from different hospitals together and performing  
44 aggregate analysis. Finally, readers may raise concerns about representativeness of  
45 inpatients to the larger cancer patients. Hospitalization rates documented from other  
46 countries varied greatly,<sup>42</sup> while similar data from China are scarce. Our estimation,  
47 using the dataset of the last province-wide Household Health Survey of Anhui, of the  
48  
49  
50  
51  
52  
53  
54  
55  
56  
57  
58  
59  
60



1  
2  
3 proportion of lung cancer patients who had been admitted to hospitals at least once was  
4 as high as 89%.<sup>43</sup>  
5

## 6 7 **Competing interests**

8  
9 The authors declare no competing interests.  
10

## 11 12 **Authors' contributions**

13  
14 XS and MD contributed equally in conceiving this project, facilitating protocol and  
15 instrument development, and drafting this manuscript. RF, ML, PZ and TJ are kore  
16 researchers for cost estimation, record extraction, follow up survey and data analysis  
17 respectively. DW provided expertise for overall design of the study, and revised and  
18 finalized the manuscript. All authors have read and approved the final submission.  
19  
20

## 21 22 **Acknowledgements**

23  
24 Development of the primitive protocol was supported by the Natural Science Foundation  
25 of China (grant number: 71503009). Refinement and implementation of the protocol is  
26 lead and supported by Collaboration Center for Cancer Control of Anhui Medical  
27 University, Anhui and Luan Center for Diseases Control and Prevention.  
28  
29

## 30 31 **References**

- 32  
33  
34 1. McErlean A, Ginsberg MS. Epidemiology of lung cancer. *Semin Roentgenol* 2011;46  
35 (3):173-7.  
36 2. World Health Organization. GLOBOCAN 2012: Estimated Cancer Incidence,  
37 Mortality and Prevalence Worldwide in 2012. <http://globocan.iarc.fr/Default.aspx>.  
38 3. Kong J, Xu F, He M, Chen K, et al. The incidence of lung cancer by histological type:  
39 a population-based study in Tianjin, China during 1981-2005. *Respirology*  
40 2014;19(8):1222-8.  
41 4. Woodard GA, Jablons DM. The Latest in Surgical Management of Stage IIIA Non-  
42 Small Cell Lung Cancer: Video-Assisted Thoracic Surgery and Tumor Molecular  
43 Profiling. *Am Soc Clin Oncol Educ Book* 2015;35:e435-41.  
44 5. Grunenwald DH. The role of surgery in non-small-cell lung cancers. *Ann Oncol*  
45 2005;16 Suppl 2:ii220-2.  
46 6. Ricardi U, Badellino S, Filippi AR. Stereotactic radiotherapy for early stage non-small  
47 cell lung cancer. *Radiat Oncol J.* 2015;33(2):57-65.  
48 7. Mangal S, Gao W, Li T1, Zhou QT. Pulmonary delivery of nanoparticle chemotherapy  
49 for the treatment of lung cancers: challenges and opportunities. *Acta Pharmacol Sin.*  
50 2017. doi: 10.1038/aps.2017.34.  
51 8. Khan I, Morris S, Hackshaw A, et al. Cost-effectiveness of first-line erlotinib in  
52 patients with advanced non-small-cell lung cancer unsuitable for chemotherapy. *BMJ*  
53 *Open* 2015; 5(7):e006733.  
54  
55  
56  
57  
58  
59

9. Garon EB, Ciuleanu TE, Arrieta O, et al. Ramucirumab plus docetaxel versus placebo plus docetaxel for second-line treatment of stage IV non-small-cell lung cancer after disease progression on platinum-based therapy (REVEL): a multicentre, double-blind, randomised phase 3 trial. *Lancet* 2014;384(9944):665-73.
10. Spigel DR, Luft A, Depenbrock H, et al. An Open-Label, Randomized, Controlled Phase II Study of Paclitaxel-Carboplatin Chemotherapy With Necitumumab Versus Paclitaxel-Carboplatin Alone in First-Line Treatment of Patients With Stage IV Squamous Non-Small-Cell Lung Cancer. *Clin Lung Cancer* 2017; pii: S1525-7304(17)30045-1.
11. Stinchcombe TE. The Use of EGFR Tyrosine Kinase Inhibitors in EGFR Wild-Type Non-Small-Cell Lung Cancer. *Curr Treat Options Oncol* 2016; 17(4):18.
12. Ahmed HZ, Liu Y, O'Connell K, et al. Guideline-concordant Care Improves Overall Survival for Locally Advanced Non-Small-cell Lung Carcinoma Patients: A National Cancer Database Analysis. *Clin Lung Cancer* 2017; pii: S1525-7304(17)30114-6.
13. Nadpara P, Madhavan SS, Tworek C. Guideline-concordant timely lung cancer care and prognosis among elderly patients in the United States: A population-based study. *Cancer Epidemiol*; 39(6):1136-44.
14. Hinde S, McKenna C, Whyte S, et al. Modelling the cost-effectiveness of public awareness campaigns for the early detection of non-small-cell lung cancer. *Br J Cancer* 2015; 113(1):135-41.
15. Kumar G, Woods B, Hess LM, et al. Cost-effectiveness of first-line induction and maintenance treatment sequences in non-squamous non-small cell lung cancer (NSCLC) in the U.S. *Lung Cancer* 2015. pii: S0169-5002(15)00281-0.
16. Warren JL, Harlan LC, Trimble EL, et al. Trends in the receipt of guideline care and survival for women with ovarian cancer: A population-based study. *Gynecol Oncol* 2017;145(3):486-492.
17. Jennens RR, Giles GG, Fox RM. Increasing underrepresentation of elderly patients with advanced colorectal or non-small-cell lung cancer in chemotherapy trials. *Int Med J* 2006;36: 216e220.
18. Murthy VH, Krumholtz HM, Gross CP. Participation in cancer clinical trials; race-, sex-, and age-based disparities. *JAMA* 2004;22(291): 2720-2726.
19. Tong Y, Huang C, Zhang J. A novel EGFR-TKI inhibitor (cAMP-H3BO3 complex) combined with thermal therapy is a promising strategy to improve lung cancer treatment outcomes. *Oncotarget*. Published Online First: 04 May 2017.doi: 10.18632/oncotarget.17628.
20. National Health and Family Planning Commission of China. Guideline for Chinese primary lung cancer diagnosis and treatment (2015 edition). *Chinese Journal of Oncology* 2015.37(1):67-78.
21. Xing Wang, Shi Yan, Yaqi Wang, et al. Surgical Quality Surveillance and Sustaining Improvement of Lung Cancer Surgery Based On Standard Operation Procedure(SOP) : Experience of Single Surgical Team. *Chinese Journal of Lung Cancer*; 20(4): 253-258.
22. Jackman DM, Zhang Y, Dalby C, et al. Cost and Survival Analysis Before and After Implementation of Dana-Farber Clinical Pathways for Patients With Stage IV Non-Small-Cell Lung Cancer. *J Oncol Pract* 2017;13(4):e346-e352.
23. Okita A, Yamashita M, Abe K, et al. Variance analysis of a clinical pathway of video-assisted single lobectomy for lung cancer. *Surg Today* 2009;39(2):104-9.

24. Duggan KJ, Descallar J, Vinod SK. Application of Guideline Recommended Treatment in Routine Clinical Practice: A Population-based Study of Stage I-IIIb Non-small Cell Lung Cancer. *Clin Oncol (R Coll Radiol)* 2016;28(10):639-47.
25. Heins MJ, de Jong JD, Spronk I, et al. Adherence to cancer treatment guidelines: influence of general and cancer-specific guideline characteristics. *Eur J Public Health* 2016; pii: ckw234. doi: 10.1093/eurpub/ckw234.
26. Yang S, Cui M, Li HY, et al. Meta-analysis of the effectiveness of Chinese and Western integrative medicine on medium and advanced lung cancer. *Chin J Integr Med* 2012;18(11):862-7.
27. XX L, YW Chen, KS Bi. Resolution of Two- way Recerral Problem in China by Studying British National Health Service System. *Chinese General Practice* 2013; 31(16):2926-29.
28. Y Sun, J Wu, SB Xie, et al. Evaluation of the medical staff clinical pathway adherence: Based on comparison of before and after provider payment reform in Henan Province. *Chinese Journal of Health Policy* 2013;6(5):37-43.
29. Henry SG, Ness RM, Stiles RA, Shintani AK, Dittus RS. A cost analysis of colonoscopy using microcosting and time-and-motion techniques. *J Gen Intern Med* 2007, 22(10):1415-21.
30. Cressman S, Lam S, Tammemagi MC, et al. Resource utilization and costs during the initial years of lung cancer screening with computed tomography in Canada. *J Thorac Oncol* 2014, 9(10):1449-58.
31. Khan I, Morris S, Pashayan N, et al. Comparing the mapping between EQ-5D-5L, EQ-5D-3L and the EORTC-QLQ-C30 in non-small cell lung cancer patients. *Health Qual Life Outcomes* 2016, 14:60.
32. SN York. Incremental Cost-Effectiveness Ratio. *Handbook of Disease Burdens and Quality of Life Measures* 2010: 4235-4235.
33. National Bureau of Statistics of China. China Statistical Yearbook 2016. <http://www.stats.gov.cn/tjsj/ndsj/2016/indexch.htm> (accessed 1 July 2017).
34. Statistics Bureau of Anhui Province. Statistical yearbook of Anhui Province in 2016. [http://www.ahtjj.gov.cn/tjj/web/tjnj\\_view.jsp?strColId=13787135717978521&\\_index=1#](http://www.ahtjj.gov.cn/tjj/web/tjnj_view.jsp?strColId=13787135717978521&_index=1#) (accessed 1 July 2017).
35. Treeage: Hollman C, Paulden M, Pechlivanoglou P, et al. A Comparison of Four Software Programs for Implementing Decision Analytic Cost-Effectiveness Models. *Pharmacoeconomics* 2017. doi: 10.1007/s40273-017-0510-8.
36. Darling G, Malthaner R, Dickie J, et al. Quality indicators for non-small cell lung cancer operations with use of a modified Delphi consensus process. *Ann Thorac Surg* 2014;98(1):183-90.
37. Fisher A, Manicavasagar V, Sharpe L, et al. A Qualitative Exploration of Clinician Views and Experiences of Treatment Decision-Making in Bipolar II Disorder. *Community Ment Health J*. Published Online First: 19 Jan 2017. doi:10.1007/s10597-016-0077-4.
38. Wennberg JE, Fisher ES. Finding high quality, efficient providers for value purchasing: cohort methods better than methods based on events. Finding high quality, efficient providers for value purchasing: cohort methods better than methods based on events. *Med Care* 2002,40(10):853-5.
39. Chen LW, Wilson FA, Gregg A, et al. Measuring the Cost and Value of Quality Improvement Initiatives for Local Health Departments. *J Public Health Manag Pract*.

1  
2  
3 Published Online First: 1 Mar 2017. doi: 10.1097/PHH.0000000000000552.

- 4 40. O' Regan P, Hegarty J. The importance of self-care for fatigue amongst patients  
5 undergoing chemotherapy for primary cancer. *Eur J Oncol Nurs* 2017;28:47-55.  
6 41. Dionne-Odom JN, Demark-Wahnefried W, Taylor RA, et al. The self-care practices  
7 of family caregivers of persons with poor prognosis cancer: differences by varying  
8 levels of caregiver well-being and preparedness. *Support Care Cancer* 2017;  
9 25(8):2437-2444.  
10 42. Prince RM, Atenafu EG, Krzyzanowska MK. Hospitalizations During Systemic  
11 Therapy for Metastatic Lung Cancer: A Systematic Review of Real World vs Clinical  
12 Trial Outcomes. *JAMA Oncol* 2015, 1(9):1333-9.  
13 43. Zhao T, Cheng J, Chai J, et al. Inpatient care burden due to cancers in Anhui, China:  
14 a cross-sectional household survey. *BMC Public Health* 2016, 16:308.  
15  
16  
17  
18  
19  
20  
21  
22  
23  
24  
25  
26  
27  
28  
29  
30  
31  
32  
33  
34  
35  
36  
37  
38  
39  
40  
41  
42  
43  
44  
45  
46  
47  
48  
49  
50  
51  
52  
53  
54  
55  
56  
57  
58  
59  
60

1  
2  
3 Figure 1 Schematic structure of sample multivariate models to be built  
4

5 Figure 2 Simulated cost by selected socio-demographics and clinical characteristics  
6 (TC=total cost; KRMB=1000 Chinese yuan)  
7

8 Figure 3 Anticipated “procedure-outcome” tree of inpatient lung cancer care (Tx = the x<sup>th</sup>  
9 round of hospitalization; Cx = the x<sup>th</sup> combination of clinical procedures; Px = possibility  
10 of using the x<sup>th</sup> combinations of clinical procedures; Ox = the x<sup>th</sup> patient outcome  
11 index/indicator)  
12  
13  
14  
15  
16  
17  
18  
19  
20  
21  
22  
23  
24  
25  
26  
27  
28  
29  
30  
31  
32  
33  
34  
35  
36  
37  
38  
39  
40  
41  
42  
43  
44  
45  
46  
47  
48  
49  
50  
51  
52  
53  
54  
55  
56  
57  
58  
59  
60

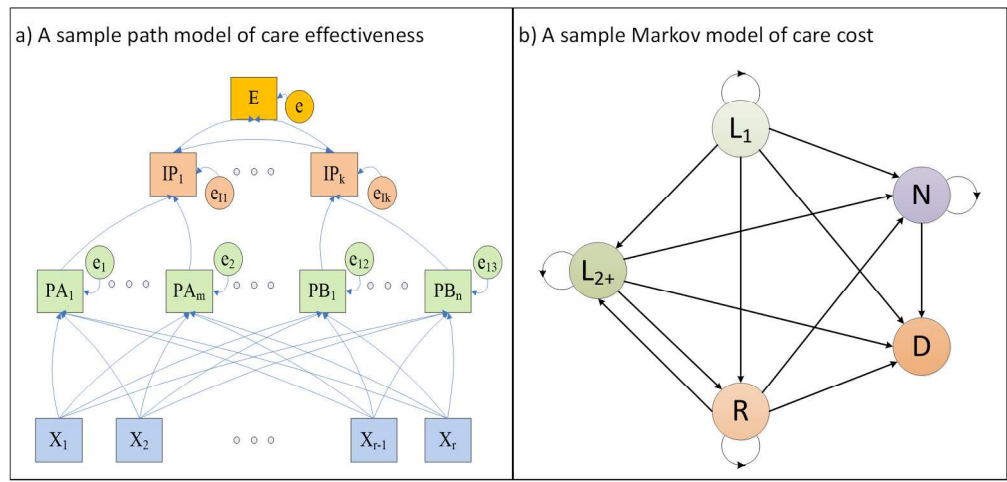

Figure 1 Schematic structure of sample multivariate models to be built/ X=independent variables; PA or PB=domain A or proximate indicators of effectiveness; IP=index of proximate variables; e=systematic error; and E= effectiveness, e.g., overall survival, QALYs; L<sub>1</sub>=first line treatment; L<sub>2+</sub>=second or third line treatment; R=remission; N=no active treatment; D=death.

188x88mm (300 x 300 DPI)



Figure 2 Simulated cost by selected socio-demographics and clinical characteristics (TC=total cost; KRMB=1000 Chinese yuan)

249x187mm (300 x 300 DPI)



Figure 3 Anticipated "procedure-outcome" tree of inpatient lung cancer care ( $T_x$  = the  $x^{\text{th}}$  round of hospitalization;  $C_x$  = the  $x^{\text{th}}$  combination of clinical procedures;  $P_x$  = possibility of using the  $x^{\text{th}}$  combinations of clinical procedures;  $O_x$  = the  $x^{\text{th}}$  patient outcome index/indicator)

242x183mm (300 x 300 DPI)



# BMJ Open

## Is it feasible to conduct a randomised controlled trial of pre-transplant exercise (pre-habilitation) for multiple myeloma patients awaiting autologous haematopoietic stem cell transplantation? (PREEMPT study).

|                               |                                                                                                                                                                                                                                                                                                                                                                                                                                                                                                                                                                                                                                                                                                                                                                                                                   |
|-------------------------------|-------------------------------------------------------------------------------------------------------------------------------------------------------------------------------------------------------------------------------------------------------------------------------------------------------------------------------------------------------------------------------------------------------------------------------------------------------------------------------------------------------------------------------------------------------------------------------------------------------------------------------------------------------------------------------------------------------------------------------------------------------------------------------------------------------------------|
| Journal:                      | <i>BMJ Open</i>                                                                                                                                                                                                                                                                                                                                                                                                                                                                                                                                                                                                                                                                                                                                                                                                   |
| Manuscript ID                 | bmjopen-2017-021333                                                                                                                                                                                                                                                                                                                                                                                                                                                                                                                                                                                                                                                                                                                                                                                               |
| Article Type:                 | Protocol                                                                                                                                                                                                                                                                                                                                                                                                                                                                                                                                                                                                                                                                                                                                                                                                          |
| Date Submitted by the Author: | 10-Jan-2018                                                                                                                                                                                                                                                                                                                                                                                                                                                                                                                                                                                                                                                                                                                                                                                                       |
| Complete List of Authors:     | Keen, Carol; Sheffield Teaching Hospitals NHS Foundation Trust, Acute Therapy Services<br>Skilbeck, Julie; Sheffield Hallam University, Nursing<br>Ross, Helen; Sheffield Teaching Hospitals NHS Foundation Trust, Acute Therapy Services<br>Smith, Lauren; Sheffield Teaching Hospitals NHS Foundation Trust, Acute Therapy Services<br>Collins, Karen; Sheffield Hallam University, Centre for Health and Social Care Research<br>Dixey, Joanne; Sheffield Teaching Hospitals NHS Foundation Trust<br>Walters, Stephen; University of Sheffield, SCHARR<br>Greenfield, Diana; Sheffield Teaching Hospitals NHS Foundation Trust<br>Snowden, John; Sheffield Teaching Hospitals NHS Foundation Trust, Department of Haematology<br>Mawson, Susan; University of Sheffield, School of Health and Related Research |
| Keywords:                     | Myeloma < HAEMATOLOGY, Bone marrow transplantation < HAEMATOLOGY, Rehabilitation medicine < INTERNAL MEDICINE                                                                                                                                                                                                                                                                                                                                                                                                                                                                                                                                                                                                                                                                                                     |
|                               |                                                                                                                                                                                                                                                                                                                                                                                                                                                                                                                                                                                                                                                                                                                                                                                                                   |

SCHOLARONE™  
Manuscripts

1  
2  
3  
4  
5 **Title:** **Is it feasible to conduct a randomised controlled trial of**  
6 **pre-transplant exercise (pre-habilitation) for multiple**  
7 **myeloma patients awaiting autologous haematopoietic**  
8 **stem cell transplantation? (PREeMPT study).**  
9

10  
11  
12  
13  
14  
15 **FUNDING:** This is an original research study funded by NIHR Research for Patient Benefit  
16 (RfPB) funding  
17

18  
19  
20  
21 **AUTHORS:** Carol Keen<sup>(1)</sup>, Julie Skilbeck<sup>(2)</sup>, Helen Ross<sup>(1)</sup>, Lauren Smith<sup>(1)</sup>, Karen Collins<sup>(2)</sup>,  
22 Joanne Dixey<sup>(1)</sup>, Stephen Walters<sup>(3)</sup>, Diana M Greenfield<sup>(1,3)</sup>, John A Snowden<sup>(1,3)</sup>,  
23 Sue Mawson<sup>(1,3)</sup>  
24

- 25  
26 (1) Sheffield Teaching Hospitals NHS Foundation Trust  
27 (2) Sheffield Hallam University  
28 (3) University of Sheffield  
29

30  
31 **CORRESPONDING AUTHOR:**

32 Carol Keen - [carol.keen@sth.nhs.uk](mailto:carol.keen@sth.nhs.uk)  
33  
34  
35  
36  
37  
38  
39  
40  
41  
42  
43  
44  
45  
46  
47  
48  
49  
50  
51  
52  
53  
54  
55  
56  
57  
58  
59  
60

## ABSTRACT

### Introduction:

While myeloma is an incurable malignancy, developments in disease management have led to increased life expectancy in recent years. Treatment typically involves stem-cell transplantation. Increased survival rates equates to more patients living with the burden of both the disease and its treatment for increasing numbers of years, rendering myeloma a long term condition.

Evidence exists to demonstrate the benefits of exercise for patients recovering from stem cell transplantation, and pre-habilitation – exercise before treatment - has been shown to be effective in other disease areas. To date there has been no research into pre-habilitation in myeloma patients awaiting transplantation treatment.

Our objective is to determine whether it is feasible to conduct a randomised controlled trial into pre-transplant exercise for patients with multiple myeloma who are awaiting autologous stem cell transplantation.

### Methods and analysis:

This mixed methods study identifies patients with diagnosis of multiple myeloma who have been assigned to the autologous transplantation list and invites them to participate in 6 weekly sessions of individualised, supervised exercise whilst awaiting transplantation.

Quantitative data to determine feasibility targets include rates of recruitment, adherence and adverse events, and outcome measures including minute walking distance (MWD) test and quality of life.

Qualitative interviews are undertaken with a purposive sample of patient to capture their experiences of the study and the intervention.

### Ethics and dissemination:

Ethics committee approval has been obtained. Dissemination will be through open-access publication and presentation and will seek to reach multi-professional bases as well as patient and carer groups, addressing the widespread interest in this area of research.

The study is registered in the clinical trials registry at <https://clinicaltrials.gov/show/NCT03135925>.

## STRENGTHS AND LIMITATIONS

- To the best of our knowledge this will be the first research of its kind
- It will provide evidence of the acceptability of pre-habilitation to patients with myeloma and the potential for future studies
- It will not provide evidence of the effectiveness of pre-habilitation, but will inform future study design for evaluating effectiveness

## INTRODUCTION

Myeloma is an incurable malignancy of antibody producing B lymphocytes and plasma cells. Equating to 7 new cases per 100,000 population in the UK, it represents 10% of all new haematological cancers.<sup>1</sup> Disease symptoms include anaemia and hypercalcaemia causing fatigue and weakness, immunosuppression and lytic lesions of bone increasing pathological fracture risk.<sup>2</sup>

Due to developments in disease management, life expectancy has increased significantly in the last 10 years.<sup>3</sup> The 5 year relative survival rate for England was 42.2% in 2011,<sup>4</sup> and is set to increase further due to earlier interventions in the disease process, more effective chemotherapies and increased use of autologous stem cell transplantation.<sup>5</sup>

Following diagnosis of multiple myeloma, the standard of care treatment for younger patients (generally, but not exclusively, under the age of 70) with adequate fitness consists of an intensive pathway commencing with induction treatment using a variety of regimens delivered as an outpatient or day case given to control disease until maximum response is achieved (usually reflected by a plateau in serum paraprotein).<sup>6-8</sup> This response is then consolidated with autologous

stem cell transplantation which permits the administration of high dose myeloablative melphalan chemotherapy, a procedure typically requiring around 3 weeks inpatient care, after which patients take several months to make a functional recovery.<sup>6-8</sup> The procedure is non-curative and relapse/progression of myeloma occurs after an average of 2-3 years, which requires re-institution of induction treatment, and, in many patients, consolidation with a second autologous transplant procedure.<sup>9,10</sup>

### Rationale for the study

Increased survival rates equates to more patients living with the burden of both the disease and its treatment for increasing numbers of years, rendering myeloma a long term condition.<sup>11</sup> The cumulative effects of the disease, compounded with the debilitating toxic nature of the treatment, impact significantly on quality of life for patients beyond the end of treatment, with late-effects symptoms including infection, fatigue, metabolic, neurological and cardiovascular disorders, as well as pain, physical fitness and psychological concerns.<sup>12</sup>

Only 20% of myeloma patients meet national physical activity guidelines post-treatment<sup>12</sup> and activity declines through treatment due to perceived barriers to exercise including pain, fear of injury and fatigue.<sup>13</sup> Although research evidence in physical activity has been demonstrated to be limited,<sup>15</sup> evidence exists to demonstrate the benefits of exercise for patients recovering from stem cell transplantation.<sup>14</sup> Pre-rehabilitation after treatment in myeloma patients has been shown to improve symptoms of physical performance, muscle strength, aerobic capacity, psychological outcomes immunological function and fatigue.<sup>16</sup> Exercise training for myeloma survivors has been shown to be safe and feasible during treatment with high attendance and adherence<sup>17</sup> and has been implemented widely in clinical practice.

Studies demonstrate that pre-transplant patients have reduced exercise capacity and increased comorbidities compared with a normal population, yet most rehabilitative interventions occur during and after treatment.<sup>14</sup> Thus while exercise rehabilitation after treatment for myeloma can be effective, we must also consider rehabilitative interventions prior to the start of treatment: pre-rehabilitation, defined as,

*“a process on the continuum of care that occurs between the time of cancer diagnosis and the beginning of acute treatment ... provides targeted interventions that improve a patient's health to reduce the incidence and the severity of current and future impairments”.*<sup>18</sup>

Examples of pre-rehabilitation exist in other clinical specialties: it has been used for some time in orthopaedic surgery to improve outcomes and postoperative recovery,<sup>19</sup> and its economic benefits have been demonstrated within colorectal surgery.<sup>20</sup> A review of pre-rehabilitation in pre-surgical cancer patients demonstrated the effective use of aerobic interventions in the management of patients undergoing thoracic surgery for lung cancer, identified the potential for its use in other oncology settings and called for further research to evaluate pre-rehabilitation for wider groups of cancer patients.<sup>19</sup>

Guidelines for the management of late and long terms effects of myeloma recommend that regular physical activity, including pre-rehabilitation and rehabilitation, and aspiration to a general healthy lifestyles, are integral to patient care pathways.<sup>12</sup>

Autologous stem cell transplantation in myeloma has become the commonest indication for transplantation, with, for example, over 1400 performed in the UK annually, and procedures are performed in what is normally considered an elderly patient population, many with comorbidities and frailty. It is an intensive toxic procedure, with a recovery period of at least 6 months and strategies to improve recovery are warranted, including pre-rehabilitation. A window of opportunity – usually a period of 4-6 months exists to offer pre-rehabilitation between diagnosis or relapse and the commencement of the autologous stem cell transplantation process. Coleman et al.<sup>21</sup> studied 24 multiple myeloma patients undergoing a home based exercise program during chemotherapy and stem cell transplantation and identified that no patient injured themselves and that the intervention

had positive effects on lean body weight, fatigue and sleep disturbance. Despite this, no evidence currently exists regarding the use of pre-habilitation exercise interventions in multiple myeloma.

This article describes the protocol for a study underway investigating the feasibility of research into the provision of an exercise intervention in patients with myeloma who are due to receive autologous stem cell transplantation.

## AIMS AND OBJECTIVES

The aim of this study is to determine whether it is feasible to conduct a randomised controlled trial into pre-transplant exercise for patients with multiple myeloma who are awaiting autologous stem cell transplantation.

We will determine this through completion of the following objectives:

1. Assess the acceptability of the study to patients by measuring recruitment and retention to the study and through qualitative interview responses
2. Explore reasons for non-consent to study participation
3. Establish whether a target cohort of patients exists.
4. Determine the most appropriate recruitment points post diagnosis through steering group feedback, recruitment rate when compared with numbers invited to join the study and qualitative interview reports
5. Assess the suitability of inclusion and exclusion criteria by examining recruitment data
6. Assess the acceptability of the intervention through qualitative interviews and retention rates during the study
7. Determine duration of the intervention before transplantation commences by monitoring point of recruitment to the study and time to transplant
8. Explore the appropriateness of outcome measures/completeness by qualitative interview responses, completion rates, time to complete.

## METHODS AND ANALYSIS

### Methodology

Mixed methods, combining qualitative and quantitative data collection and analysis, are used to achieve the described aims and objectives.

### Design

This is a prospective feasibility study – see Figure 1 for study flow chart.

### Setting

Assessments and exercise sessions take place in the physiotherapy outpatient department in an acute hospital trust, which is a regional specialist centre for haematological services. Patient interviews take place in private rooms in the physiotherapy department or over the telephone for patient convenience.

### Feasibility

The feasibility of the intervention is determined through the following targets:

- Recruitment: based on patient numbers at the study site, the recruitment target is 24 patients in a 12 month period (i.e. 2 patients per month);
- Attendance: minimum average attendance at exercise sessions of 66% of the scheduled/invited sessions;
- Retention: 80% patient retention to 6-week follow up assessment;
- Adverse events: adverse events are closely monitored and use to inform decisions to proceed.

Acceptability of the intervention to patients is also determined through the qualitative data collection and analysis, described in a later section.

### Quantitative Data Collection and Analysis

Data collection will take place between September 2016 and February 2018.

#### Sampling

Consecutive sampling is used to recruit patients to this study who have a diagnosis of multiple myeloma and have been assigned to the autologous transplantation list. The recruiting centre transplants approximately 70 myeloma patients per year: sampling all patients over a 12 month period will indicate study recruitment feasibility. This feasibility study did not have a formal sample size calculation to determine a priori the number of participants to recruit; it aimed to recruit for a fixed period of time (12 months) at a single centre and one of the outcomes was to estimate the recruitment rate per month.

#### Inclusion criteria

All patients with a diagnosis of multiple myeloma, assigned to the autologous transplantation waiting list for either a first or second transplant.<sup>22</sup>

#### Exclusion Criteria

To allow safe completion of initial objective assessments, patients with a history of unstable angina or heart attack in the previous month are excluded.<sup>23</sup> Medical stability is a pre-requisite for transplantation, therefore no patients are excluded on this basis.

#### Recruitment

Patients are screened at clinic appointments by the bone marrow transplant team during their preparation for transplant. Patients meeting the inclusion criteria are provided with verbal and written information and invited to be involved in the study. Follow-up takes place after 48 hours via a phone call from a study physiotherapist: any remaining questions are discussed and if the patient agrees to take part then written consent is obtained and an initial assessment appointment is made.

Patients who choose not to join the study are invited to take part in a qualitative interview to explore their reasoning (Figure 1). This is described in more detail under Qualitative Data Collection and Analysis.

#### Intervention:

##### *Initial Assessment*

Patients attend an initial assessment with a study physiotherapist who undertakes the following:

- explanation of the pre-habilitation programme
- documentation of written consent
- subjective history including co-morbidities and patient goals
- induction to the gym area equipment
- provision of booklet and DVD with physical activity advice
- baseline objective assessment (Table 1)
- design of individualised gym program in line with patient abilities and goals
- completion of an initial gym circuit with close supervision.

##### *Weeks 2-5*

Patients attend weekly 1 hour physiotherapist-led group gym sessions and complete their individualised program. Supervision is available as required and programs are progressed in line with patient ability and performance.

##### *Week 6*

Completion of final gym circuit and repeat of objective assessments (Table 1).

##### *Follow up*

Patients are followed up on admission for transplant, and again on transplant discharge, for further repeat of objective assessments (Table 1).

|  | Recruitment | Initial Assessment | Weeks 2-5 | Week 6 | Transplant Admission | Transplant Discharge |
|--|-------------|--------------------|-----------|--------|----------------------|----------------------|
|  |             |                    |           |        |                      |                      |

|                        |   |   |   |   |   |   |
|------------------------|---|---|---|---|---|---|
| Screening data         | ✓ |   |   |   |   |   |
| Demographic data       |   | ✓ |   |   |   |   |
| 6 minute walk distance |   | ✓ |   | ✓ | ✓ | ✓ |
| PROMs                  |   | ✓ |   | ✓ | ✓ | ✓ |
| Activity data          |   | ✓ | ✓ | ✓ | ✓ | ✓ |
| Adverse Events         |   | ✓ | ✓ | ✓ |   |   |

**Table 1 - Study Data Collection**

### Outcome measures

The following data are captured for study participants.

#### *Screening Data*

Through initial screening and recruitment, data is collected on:

- number of patients meeting inclusion criteria
- patients accepting initial study information
- patients agreeing to attend for initial assessment
- reasons for non-participation.

#### *Demographic data*

The following demographic data is captured during the initial assessment:

- gender
- length of diagnosis
- baseline physical activity levels
- transplant history
- pre-transplant therapies received
- time to transplantation from decision to transplant
- other relevant information.

#### *Functional measure*

Patients undertake a 6 minute walk test (6MWD) before and after the exercise intervention. The six minute walk test is a useful field test of functional capacity, is safe to administer and although it has less correlation with peak oxygen capacity than the shuttle walk test, it is better tolerated by patients and is more reflective of activities of daily living as it is a submaximal exercise test.<sup>23</sup> The six minute walk test has been found to be a valid and reliable test in patients with cancer.<sup>24</sup>

#### *Patient Reported Outcome Measures (PROMs)*

As this is a feasibility study, it is useful to determine the feasibility and acceptability of outcomes to be used. For this reason, two different sets of patient reported outcome measures (PROMs) are issued to alternate patients taking part in the study (Table 2). The data collected in the outcome measures and in the qualitative interviews will determine their value in any future studies.

| Group                      | Category      | Measure                                                     |
|----------------------------|---------------|-------------------------------------------------------------|
| Physical activity/fitness  | Group 1       | International Physical Activity Questionnaire <sup>25</sup> |
|                            | Group 2       | Godin Leisure Time <sup>26</sup>                            |
| Mental wellbeing           | Group 1 and 2 | Warwick and Edinburgh Mental Well-being Scale <sup>27</sup> |
| Quality of Life            | Group 1       | FACT-MM <sup>28</sup>                                       |
|                            | Group 2       | EORTC QLQ C30 MY20 <sup>29</sup>                            |
| Self-efficacy for exercise | Group 1 and 2 | Self-Efficacy for Exercise Scale <sup>30</sup>              |

## Table 2 - Patient Reported Outcome Measures

### *Activity Data*

The following activity data is collected for each participant:

- the number of gym attendances
- follow-up compliance
- withdrawals from the study and at which stage of the study these occur
- reasons for withdrawal or non-attendance.

### *Data Collection*

Table 1 shows the full data collection schedule for the study.

### Data Analysis

Flow of participants through the study is captured and the baseline clinical and demographic characteristics of consented participants assessed with appropriate summary statistics.

The data analysis for the feasibility objectives uses descriptive statistics and focuses on confidence interval estimation.

1. The feasibility of recruitment to main trial is assessed with the consent rate (defined as the ratio of no. of consented participants/no. of eligible participants) and its associated 95% confidence interval and the recruitment rate per month and its associated 95% confidence intervals. The target recruitment rate is a minimum of 2 participants per month.
2. Reporting of the number and characteristics of eligible patients approached for the study and reasons for refused consent
3. Reporting of study participant retention rates at six-week follow-up (e.g. participants with a valid 6-minute walk outcome – the probable primary outcome for the main trial) and its associated 95% confidence interval. The target is a minimum of 80% retention to 6-week follow up assessment.
4. Reporting of the number (and rate) of serious adverse events/incidents (and its associated 95% CI) experienced by the participants in the pre-transplantation period. A serious adverse event (SAE) is defined as any adverse event or adverse reaction that results in death, is life-threatening, requires hospitalisation or prolongation of existing hospitalisation, results in persistent or significant disability or incapacity, or is a congenital anomaly or birth defect.
5. Reporting of the decision on primary endpoint for any main trial (current estimate suggests 80% power, two-sided, with n=610 to detect 5% [18m] difference in 6 min walk test with 10% dropout at 12m).

### **Qualitative data collection and analysis**

#### Sampling and Data Collection

The aim of the qualitative data collection and analysis is to explore in greater detail patients' perceptions of the study including its acceptability, as well as barriers and facilitators to participation.

Patients who decline to take part in the exercise trial are asked if they would undertake a short telephone interview to ascertain their reasons for not taking part in the study. Participants who have already consented to take part in the trial and are undertaking the exercise programme are approached by a member of the clinical team and asked if they would be interested in taking part in a series of face-to-face or telephone interviews (Figure 1).

The interview topic guide is informed by evidence regarding acceptability and barriers and facilitators to participation from previous studies in pre-habilitation and studies of exercise in patients with multiple myeloma.<sup>17,21</sup> It is also tailored to match developments and areas of interest that emerged from the quantitative data collection as the study progresses. The topic guide is flexible in order to enable exploration of individual experiences, for example, those who had fully completed the intervention compared to those who may have had only limited participation.



1  
2  
3 Topic areas include: reasons for non-participation, participants' characteristics and descriptive  
4 information regarding the nature of their disease management to date; the patient experience of  
5 the intervention, with reference to aspects that may impact the design of future study e.g.  
6 recruitment, ease or difficulty of attendance, timing and nature of data collection, suitability of  
7 outcome measures; barriers and enablers to participation in the study.

### 8 Qualitative Analysis

9 The Framework Approach is used to analyse the qualitative data.<sup>31</sup> This method is appropriate for  
10 identifying, analysing, and reporting themes and patterns within data. It is a flexible and useful  
11 research tool, which can potentially provide a rich and detailed, yet simple account of data. Early on  
12 in the analysis the transcripts are repeatedly read to develop an understanding of the breadth and  
13 depth of the data. During this process, data are labelled and coded in an iterative process whereby  
14 patterns and sequences of content over time are identified within and across all the participants.  
15 Emergent themes are further developed and refined by analysing similarities and divergences  
16 between and within the participants, to form a coherent pattern<sup>32</sup>.

## 18 **ETHICS AND DISSEMINATION**

### 19 Ethical Consideration

20 Ethical approval for this study was obtained from NHS Health Research Authority - Yorkshire and  
21 Humber reference 16/YH/0304.

22 Ethical issues relating to informed consent and confidentiality are addressed throughout. It is  
23 acknowledged that patients approached and participating in this study may be physically debilitated  
24 and experiencing anxiety, having received a new cancer diagnosis and awaiting a challenging  
25 programme of treatment. Due care and diligence are taken when consenting potential subjects and  
26 the option to withdraw from the study at any point is reiterated. In particular, the nature of  
27 qualitative interviews, focusing on personal experiences of illness and treatment, may result in some  
28 distress to some participants. The researchers have relevant experience in working with patients  
29 with life-threatening illness and are skilled at talking to them, as well as being able to recognise  
30 patient distress.

### 31 Dissemination

32 This study has involvement from, and relevance to, the professions of physiotherapy, medicine and  
33 nursing. Dissemination will incorporate each of these professions and reach into the wider  
34 healthcare community. We will seek to share the findings of the study through local, national and  
35 international channels.

36 Patient involvement in the project has been through representation in study design and on the  
37 project steering group from the North Trent Cancer Research Network Consumer Research Panel.  
38 We will liaise with this group to invite ideas regarding dissemination to study participants, patients  
39 and carers.

40 Where the findings of the study have implications for the provision of new or existing services to  
41 patients with myeloma, we will ensure dissemination to relevant key opinion leaders and  
42 stakeholders to support decision making.

43 The study is registered in the clinical trials registry at <https://clinicaltrials.gov/show/NCT03135925>.

## 44 **DISCUSSION**

45 It is anticipated that this study will demonstrate the feasibility of conducting research into pre-  
46 habilitation physical activity programmes. Factors likely to affect feasibility may include: patient  
47 perception of role of physical activity; patient time commitments; patient wellness to take part;  
48 patient enjoyment of exercise.

1  
2  
3 If feasibility is confirmed then we will seek to establish a larger scale study to test the efficacy of the  
4 intervention. The findings from this study will be used to support power and sample size  
5 calculations and to establish suitable outcome measures for future studies.

6 If the feasibility criteria are not satisfied then there will be lessons to learn regarding the potential  
7 for future studies in the field, or modifications to the intervention or study design if further study is  
8 indicated. Since pre-habilitation is an area of growing interest in other clinical areas, including other  
9 cancer and non-cancer pathologies, then it is anticipated that the findings of this study will also be of  
10 interest to practitioners considering pre-habilitation outside of myeloma.

11 Establishing the feasibility of research in this field is important to explore the case for pre-  
12 habilitation. The effects of bone marrow transplantation can have a high cost to the individual and  
13 to health services. There is clearly value in exploring treatment options that may lessen the effects  
14 of treatment, particularly those with relatively low associated costs such as exercise pre-habilitation.

### 15 16 17 **CONTRIBUTORS**

18 JD conceived of the idea and secured funding with CK, JAS, KC, DG, SW and SM, who is the Chief  
19 Investigator. Ethics and research governance applications were made by SM, CK and HR. JS, HR and  
20 LS provided intellectual input and study design for the final protocol of the study.

### 21 22 **DATA SHARING STATEMENT**

23 As the paper relates to a study protocol, there are no additional data sets available as yet

### 24 25 **FUNDING**

26 The research was funded by the NIHR Research for Patient Benefit (RfPB) Programme PB-PG-0214-  
27 33067. The views expressed are those of the author(s) and not necessarily those of the NHS, the  
28 NIHR or the Department of Health.

### 29 30 31 **FIGURE LEGEND**

32 Figure 1 - Recruitment and Intervention Flow Chart

### 33 34 **REFERENCES**

- 35 1. Haematological Malignancy Research Network. Myeloma Statistics. Statistics on Individual  
36 Disorders. <https://www.hmrn.org/statistics/disorders/24>. Published 2017.
- 37 2. Bird JM, Owen RG, D'Sa S, et al. Haemato-cncology Task Force of the British Committee for  
38 Standards in Haematology, UK Myeloma Forum: Guidelines for the Diagnosis and  
39 Management of Multiple Myeloma. *Br Jouenal Haematol*. 2011;154(1):32-75.
- 40 3. Renshaw C, Ketley N, Møller H, Davies EA. Trends in the incidence and survival of multiple  
41 myeloma in South East England 1985-2004. *BMC Cancer*. 2010;10(1):74. doi:10.1186/1471-  
42 2407-10-74.
- 43 4. Cancer Research UK. Myeloma Statistics. About Cancer.  
44 [http://www.cancerresearchuk.org/health-professional/cancer-statistics/statistics-by-cancer-](http://www.cancerresearchuk.org/health-professional/cancer-statistics/statistics-by-cancer-type/myeloma)  
45 [type/myeloma](http://www.cancerresearchuk.org/health-professional/cancer-statistics/statistics-by-cancer-type/myeloma). Published 2017.
- 46 5. Kumar SK, Rajkumar S V., Dispenzieri A, et al. Improved survival in multiple myeloma and the  
47 impact of novel therapies. *Blood*. 2008;111(5):2516-2520. doi:10.1182/blood-2007-10-  
48 116129.
- 49 6. Snowden JA, Ahmedzai SH, Ashcroft J, et al. Guidelines for supportive care in multiple  
50 myeloma 2011. *Br J Haematol*. 2011;154(1):76-103. doi:10.1111/j.1365-2141.2011.08574.x.
- 51 7. Bird JM, Owen RG, D'Sa S, et al. Guidelines for the diagnosis and management of multiple  
52 myeloma 2011. *Br J Haematol*. 2011;154(1):32-75. doi:10.1111/j.1365-2141.2011.08573.x.
- 53 8. Pratt G, Jenner M, Owen R, et al. Updates to the guidelines for the diagnosis and  
54  
55  
56  
57

- management of multiple myeloma. *Br J Haematol*. 2014;167(1):131-133. doi:10.1111/bjh.12926.
9. Cook G, Ashcroft AJ, Cairns DA, et al. The effect of salvage autologous stem-cell transplantation on overall survival in patients with relapsed multiple myeloma (final results from BSBMT/UKMF Myeloma X Relapse [Intensive]): a randomised, open-label, phase 3 trial. *Lancet Haematol*. 2016;3(7):e340-e351. doi:10.1016/S2352-3026(16)30049-7.
  10. Cook G, Williams C, Brown JM, et al. High-dose chemotherapy plus autologous stem-cell transplantation as consolidation therapy in patients with relapsed multiple myeloma after previous autologous stem-cell transplantation (NCRI Myeloma X Relapse [Intensive trial]): a randomised, open-label, . *Lancet Oncol*. 2014;15(8):874-885. doi:10.1016/S1470-2045(14)70245-1.
  11. Boland E, Eiser C, Ezaydi Y, Greenfield DM, Ahmedzai SH, Snowden JA. Living With Advanced But Stable Multiple Myeloma: A Study of the Symptom Burden and Cumulative Effects of Disease and Intensive (Hematopoietic Stem Cell Transplant-Based) Treatment on Health-Related Quality of Life. *J Pain Symptom Manage*. 2013;46(5):671-680. doi:10.1016/j.jpainsymman.2012.11.003.
  12. Snowden JA, Greenfield DM, Bird JM, et al. Guidelines for screening and management of late and long-term consequences of myeloma and its treatment. *Br J Haematol*. 2017;176(6):888-907. doi:10.1111/bjh.14514.
  13. Craike MJ, Hose K, Courneya KS, Harrison SJ, Livingston PM. Perceived benefits and barriers to exercise for recently treated patients with multiple myeloma: a qualitative study. *BMC Cancer*. 2013;13(1):319. doi:10.1186/1471-2407-13-319.
  14. Hoffman R, Mooney K, Barton D, Rothwell E, Le Stayo P, Wong B. Exercise and stem cell transplantation. 2013.
  15. Smith L, McCourt O, Henrich M, et al. Multiple myeloma and physical activity: a scoping review. *BMJ Open*. 2015;5(11):e009576. doi:10.1136/bmjopen-2015-009576.
  16. Persoon S, Kersten MJ, ChinAPaw MJ, et al. Design of the EXercise Intervention after Stem cell Transplantation (EXIST) study: a randomized controlled trial to evaluate the effectiveness and cost-effectiveness of an individualized high intensity physical exercise program on fitness and fatigue in p. *BMC Cancer*. 2010;10(1):671. doi:10.1186/1471-2407-10-671.
  17. Groeneveldt L, Mein G, Garrod R, et al. A mixed exercise training programme is feasible and safe and may improve quality of life and muscle strength in multiple myeloma survivors. *BMC Cancer*. 2013;13(1):31. doi:10.1186/1471-2407-13-31.
  18. Silver JK. A journey to make cancer rehabilitation the standard of care. *Work*. 2013;46:473-475.
  19. Silver JK, Baima J. Cancer Prehabilitation. *Am J Phys Med Rehabil*. 2013;92(8):715-727. doi:10.1097/PHM.0b013e31829b4afe.
  20. Lee L, Li C, Landry T, et al. A Systematic Review of Economic Evaluations of Enhanced Recovery Pathways for Colorectal Surgery. *Ann Surg*. 2014;259(4):670-676. doi:10.1097/SLA.0b013e318295fef8.
  21. Coleman E, Coon S, Hall-Barrow J, Richards K, Gaylor D, Stewart B. Feasibility of exercise during treatment for multiple myeloma. *Cancer Nurs*. 2003;26:410-419.
  22. G. Cook; C. Williams; A. Szubert; K. Yong; J. Cavet; H. Hunter; J. Bird; S. Bell; S. O'Connor; J. Cavenagh; J. Snowden; C. Parrish; J. Ashcroft; J. Brown; C. Morris. A second autologous stem cell transplant induces superior response durability following bortezomib-containing reinduction therapy for relapsed multiple myeloma: results from the BSBMT/UKMF myeloma x (intensive) trial: O155. *Bone Marrow Transplant*. 2013;48(S17).

- 1  
2  
3 23. Enright PL. The Six-Minute Walk Test. *Respir Care*. 2003;48(8):783-785.  
4 24. Schmidt, K., Vogt, L., Thiel, C. Jäger, E. Banzwer W. Validity of the six-minute walk test in  
5 cancer patients. *Int J Sports Med*. 2013;34(7):631-636.  
6 25. Craig C, Marshall A, Bauman A, et al. International Physical Activity Questionnaire: 12-Country  
7 Reliability and Validity. *Med Sci Sport Exerc*. 2003;35(8):1381-1395.  
8 doi:10.1249/01.MSS.0000078924.61453.FB.  
9 26. Godin G, Shephard RJ. Godin Leisure-Time Exercise Questionnaire. *Med Sci Sports Exerc*.  
10 1997;29:36-38.  
11 27. Tennant R, Hiller L, Fishwick R, et al. The Warwick-Edinburgh Mental Well-being Scale  
12 (WEMWBS): development and UK validation. *Health Qual Life Outcomes*. 2007;5(1):63.  
13 doi:10.1186/1477-7525-5-63.  
14 28. Wagner LI, Robinson D, Weiss M, et al. Content Development for the Functional Assessment  
15 of Cancer Therapy-Multiple Myeloma (FACT-MM): Use of Qualitative and Quantitative  
16 Methods for Scale Construction. *J Pain Symptom Manage*. 2012;43(6):1094-1104.  
17 doi:10.1016/j.jpainsymman.2011.06.019.  
18 29. European Organisation for Research and Treatment of Cancer. EORTC Quality of life  
19 Questionnaire. Quality of Life. <http://groups.eortc.be/qol/eortc-qlq-c30>. Published 2017.  
20 30. Kroll T, Kehn M, Ho P-S, Groah S. The SCI Exercise Self-Efficacy Scale (ESES): development and  
21 psychometric properties. *Int J Behav Nutr Phys Act*. 2007;4(1):34. doi:10.1186/1479-5868-4-  
22 34.  
23 31. Ritchie J, Lewis J. *Qualitative Research Practice*. London: Sage; 2003.  
24 32. Sangster-Gormley E. How case-study research can help to explain implementation of the  
25 nurse practitioner role. *Nurse Res*. 2013;20(4):6-11.  
26 <http://www.ncbi.nlm.nih.gov/pubmed/23520706>.  
27  
28  
29  
30

### COMPETING INTERESTS

Professor Walters reports personal fees from Book Royalties, grants from NIHR and MRC, personal fees from External examining.

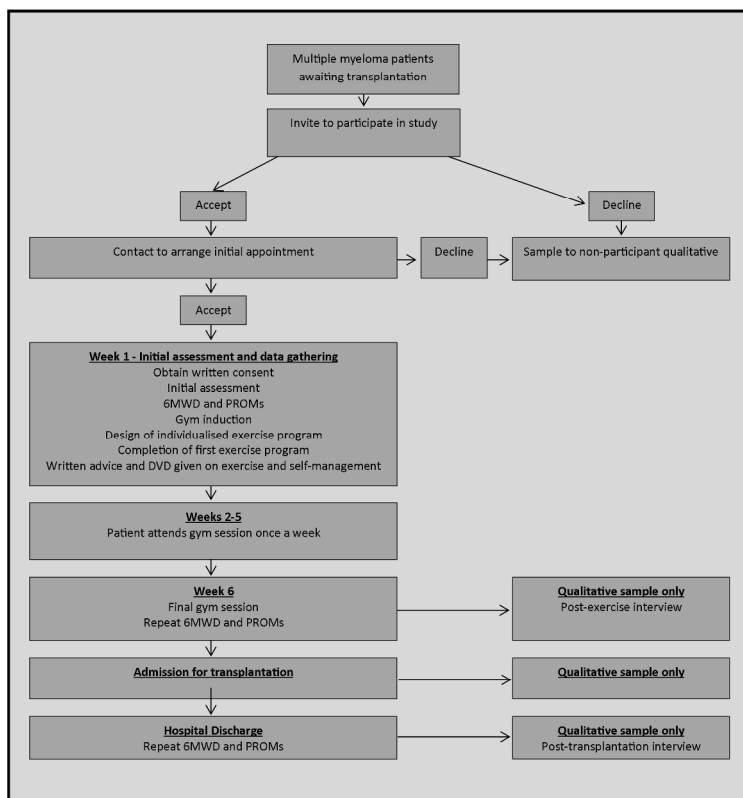

Retention and Intervention Flow Chart

209x297mm (300 x 300 DPI)

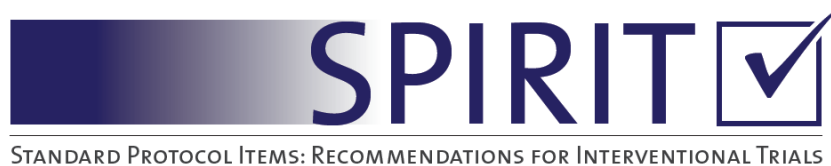

SPIRIT 2013 Checklist: Recommended items to address in a clinical trial protocol and related documents\*

| Section/item                      | Item No | Description                                                                                                                                                                                                                                                                              |
|-----------------------------------|---------|------------------------------------------------------------------------------------------------------------------------------------------------------------------------------------------------------------------------------------------------------------------------------------------|
| <b>Administrative information</b> |         |                                                                                                                                                                                                                                                                                          |
| Title                             | 1       | Descriptive title identifying the study design, population, interventions, and, if applicable, trial acronym                                                                                                                                                                             |
| Trial registration                | 2a      | Trial identifier and registry name. If not yet registered, name of intended registry                                                                                                                                                                                                     |
|                                   | 2b      | All items from the World Health Organization Trial Registration Data Set                                                                                                                                                                                                                 |
| Protocol version                  | 3       | Date and version identifier                                                                                                                                                                                                                                                              |
| Funding                           | 4       | Sources and types of financial, material, and other support                                                                                                                                                                                                                              |
| Roles and responsibilities        | 5a      | Names, affiliations, and roles of protocol contributors                                                                                                                                                                                                                                  |
|                                   | 5b      | Name and contact information for the trial sponsor                                                                                                                                                                                                                                       |
|                                   | 5c      | Role of study sponsor and funders, if any, in study design; collection, management, analysis, and interpretation of data; writing of the report; and the decision to submit the report for publication, including whether they will have ultimate authority over any of these activities |
|                                   | 5d      | Composition, roles, and responsibilities of the coordinating centre, steering committee, endpoint adjudication committee, data management team, and other individuals or groups overseeing the trial, if applicable (see Item 21a for data monitoring committee)                         |
| <b>Introduction</b>               |         |                                                                                                                                                                                                                                                                                          |
| Background and rationale          | 6a      | Description of research question and justification for undertaking the trial, including summary of relevant studies (published and unpublished) examining benefits and harms for each intervention                                                                                       |
|                                   | 6b      | Explanation for choice of comparators                                                                                                                                                                                                                                                    |
| Objectives                        | 7       | Specific objectives or hypotheses                                                                                                                                                                                                                                                        |
| Trial design                      | 8       | Description of trial design including type of trial (eg, parallel group, crossover, factorial, single group), allocation ratio, and framework (eg, superiority, equivalence, noninferiority, exploratory)                                                                                |

## Methods: Participants, interventions, and outcomes

|                      |     |                                                                                                                                                                                                                                                                                                                                                                                |
|----------------------|-----|--------------------------------------------------------------------------------------------------------------------------------------------------------------------------------------------------------------------------------------------------------------------------------------------------------------------------------------------------------------------------------|
| Study setting        | 9   | Description of study settings (eg, community clinic, academic hospital) and list of countries where data will be collected. Reference to where list of study sites can be obtained                                                                                                                                                                                             |
| Eligibility criteria | 10  | Inclusion and exclusion criteria for participants. If applicable, eligibility criteria for study centres and individuals who will perform the interventions (eg, surgeons, psychotherapists)                                                                                                                                                                                   |
| Interventions        | 11a | Interventions for each group with sufficient detail to allow replication, including how and when they will be administered                                                                                                                                                                                                                                                     |
|                      | 11b | Criteria for discontinuing or modifying allocated interventions for a given trial participant (eg, drug dose change in response to harms, participant request, or improving/worsening disease)                                                                                                                                                                                 |
|                      | 11c | Strategies to improve adherence to intervention protocols, and any procedures for monitoring adherence (eg, drug tablet return, laboratory tests)                                                                                                                                                                                                                              |
|                      | 11d | Relevant concomitant care and interventions that are permitted or prohibited during the trial                                                                                                                                                                                                                                                                                  |
| Outcomes             | 12  | Primary, secondary, and other outcomes, including the specific measurement variable (eg, systolic blood pressure), analysis metric (eg, change from baseline, final value, time to event), method of aggregation (eg, median, proportion), and time point for each outcome. Explanation of the clinical relevance of chosen efficacy and harm outcomes is strongly recommended |
| Participant timeline | 13  | Time schedule of enrolment, interventions (including any run-ins and washouts), assessments, and visits for participants. A schematic diagram is highly recommended (see Figure)                                                                                                                                                                                               |
| Sample size          | 14  | Estimated number of participants needed to achieve study objectives and how it was determined, including clinical and statistical assumptions supporting any sample size calculations                                                                                                                                                                                          |
| Recruitment          | 15  | Strategies for achieving adequate participant enrolment to reach target sample size                                                                                                                                                                                                                                                                                            |

## Methods: Assignment of interventions (for controlled trials)

### Allocation:

|                     |     |                                                                                                                                                                                                                                                                                                                                                          |
|---------------------|-----|----------------------------------------------------------------------------------------------------------------------------------------------------------------------------------------------------------------------------------------------------------------------------------------------------------------------------------------------------------|
| Sequence generation | 16a | Method of generating the allocation sequence (eg, computer-generated random numbers), and list of any factors for stratification. To reduce predictability of a random sequence, details of any planned restriction (eg, blocking) should be provided in a separate document that is unavailable to those who enrol participants or assign interventions |
|---------------------|-----|----------------------------------------------------------------------------------------------------------------------------------------------------------------------------------------------------------------------------------------------------------------------------------------------------------------------------------------------------------|

|    |                |     |                                                                         |
|----|----------------|-----|-------------------------------------------------------------------------|
| 1  |                |     |                                                                         |
| 2  | Allocation     | 16b | Mechanism of implementing the allocation sequence (eg, central          |
| 3  | concealment    |     | telephone; sequentially numbered, opaque, sealed envelopes),            |
| 4  | mechanism      |     | describing any steps to conceal the sequence until interventions are    |
| 5  |                |     | assigned                                                                |
| 6  |                |     |                                                                         |
| 7  | Implementation | 16c | Who will generate the allocation sequence, who will enrol participants, |
| 8  |                |     | and who will assign participants to interventions                       |
| 9  |                |     |                                                                         |
| 10 | Blinding       | 17a | Who will be blinded after assignment to interventions (eg, trial        |
| 11 | (masking)      |     | participants, care providers, outcome assessors, data analysts), and    |
| 12 |                |     | how                                                                     |
| 13 |                | 17b | If blinded, circumstances under which unblinding is permissible, and    |
| 14 |                |     | procedure for revealing a participant's allocated intervention during   |
| 15 |                |     | the trial                                                               |
| 16 |                |     |                                                                         |
| 17 |                |     |                                                                         |
| 18 |                |     |                                                                         |
| 19 |                |     |                                                                         |

### Methods: Data collection, management, and analysis

|    |                 |     |                                                                          |
|----|-----------------|-----|--------------------------------------------------------------------------|
| 20 |                 |     |                                                                          |
| 21 | Data collection | 18a | Plans for assessment and collection of outcome, baseline, and other      |
| 22 | methods         |     | trial data, including any related processes to promote data quality (eg, |
| 23 |                 |     | duplicate measurements, training of assessors) and a description of      |
| 24 |                 |     | study instruments (eg, questionnaires, laboratory tests) along with      |
| 25 |                 |     | their reliability and validity, if known. Reference to where data        |
| 26 |                 |     | collection forms can be found, if not in the protocol                    |
| 27 |                 | 18b | Plans to promote participant retention and complete follow-up,           |
| 28 |                 |     | including list of any outcome data to be collected for participants who  |
| 29 |                 |     | discontinue or deviate from intervention protocols                       |
| 30 |                 |     |                                                                          |
| 31 | Data            | 19  | Plans for data entry, coding, security, and storage, including any       |
| 32 | management      |     | related processes to promote data quality (eg, double data entry;        |
| 33 |                 |     | range checks for data values). Reference to where details of data        |
| 34 |                 |     | management procedures can be found, if not in the protocol               |
| 35 |                 |     |                                                                          |
| 36 | Statistical     | 20a | Statistical methods for analysing primary and secondary outcomes.        |
| 37 | methods         |     | Reference to where other details of the statistical analysis plan can be |
| 38 |                 |     | found, if not in the protocol                                            |
| 39 |                 | 20b | Methods for any additional analyses (eg, subgroup and adjusted           |
| 40 |                 |     | analyses)                                                                |
| 41 |                 | 20c | Definition of analysis population relating to protocol non-adherence     |
| 42 |                 |     | (eg, as randomised analysis), and any statistical methods to handle      |
| 43 |                 |     | missing data (eg, multiple imputation)                                   |
| 44 |                 |     |                                                                          |
| 45 |                 |     |                                                                          |
| 46 |                 |     |                                                                          |
| 47 |                 |     |                                                                          |
| 48 |                 |     |                                                                          |
| 49 |                 |     |                                                                          |
| 50 |                 |     |                                                                          |
| 51 |                 |     |                                                                          |

### Methods: Monitoring

|    |                 |     |                                                                      |
|----|-----------------|-----|----------------------------------------------------------------------|
| 52 |                 |     |                                                                      |
| 53 | Data monitoring | 21a | Composition of data monitoring committee (DMC); summary of its role  |
| 54 |                 |     | and reporting structure; statement of whether it is independent from |
| 55 |                 |     | the sponsor and competing interests; and reference to where further  |
| 56 |                 |     | details about its charter can be found, if not in the protocol.      |
| 57 |                 |     | Alternatively, an explanation of why a DMC is not needed             |
| 58 |                 |     |                                                                      |
| 59 |                 |     |                                                                      |
| 60 |                 |     |                                                                      |



|    |          |     |                                                                        |
|----|----------|-----|------------------------------------------------------------------------|
| 1  |          |     |                                                                        |
| 2  |          | 21b | Description of any interim analyses and stopping guidelines, including |
| 3  |          |     | who will have access to these interim results and make the final       |
| 4  |          |     | decision to terminate the trial                                        |
| 5  |          |     |                                                                        |
| 6  | Harms    | 22  | Plans for collecting, assessing, reporting, and managing solicited and |
| 7  |          |     | spontaneously reported adverse events and other unintended effects     |
| 8  |          |     | of trial interventions or trial conduct                                |
| 9  |          |     |                                                                        |
| 10 |          |     |                                                                        |
| 11 | Auditing | 23  | Frequency and procedures for auditing trial conduct, if any, and       |
| 12 |          |     | whether the process will be independent from investigators and the     |
| 13 |          |     | sponsor                                                                |
| 14 |          |     |                                                                        |

### Ethics and dissemination

|    |                   |     |                                                                               |
|----|-------------------|-----|-------------------------------------------------------------------------------|
| 15 |                   |     |                                                                               |
| 16 |                   |     |                                                                               |
| 17 | Research ethics   | 24  | Plans for seeking research ethics committee/institutional review board        |
| 18 | approval          |     | (REC/IRB) approval                                                            |
| 19 |                   |     |                                                                               |
| 20 |                   |     |                                                                               |
| 21 | Protocol          | 25  | Plans for communicating important protocol modifications (eg,                 |
| 22 | amendments        |     | changes to eligibility criteria, outcomes, analyses) to relevant parties      |
| 23 |                   |     | (eg, investigators, REC/IRBs, trial participants, trial registries, journals, |
| 24 |                   |     | regulators)                                                                   |
| 25 |                   |     |                                                                               |
| 26 | Consent or assent | 26a | Who will obtain informed consent or assent from potential trial               |
| 27 |                   |     | participants or authorised surrogates, and how (see Item 32)                  |
| 28 |                   |     |                                                                               |
| 29 |                   | 26b | Additional consent provisions for collection and use of participant data      |
| 30 |                   |     | and biological specimens in ancillary studies, if applicable                  |
| 31 |                   |     |                                                                               |
| 32 |                   |     |                                                                               |
| 33 | Confidentiality   | 27  | How personal information about potential and enrolled participants will       |
| 34 |                   |     | be collected, shared, and maintained in order to protect confidentiality      |
| 35 |                   |     | before, during, and after the trial                                           |
| 36 |                   |     |                                                                               |
| 37 | Declaration of    | 28  | Financial and other competing interests for principal investigators for       |
| 38 | interests         |     | the overall trial and each study site                                         |
| 39 |                   |     |                                                                               |
| 40 |                   |     |                                                                               |
| 41 | Access to data    | 29  | Statement of who will have access to the final trial dataset, and             |
| 42 |                   |     | disclosure of contractual agreements that limit such access for               |
| 43 |                   |     | investigators                                                                 |
| 44 |                   |     |                                                                               |
| 45 | Ancillary and     | 30  | Provisions, if any, for ancillary and post-trial care, and for                |
| 46 | post-trial care   |     | compensation to those who suffer harm from trial participation                |
| 47 |                   |     |                                                                               |
| 48 | Dissemination     | 31a | Plans for investigators and sponsor to communicate trial results to           |
| 49 | policy            |     | participants, healthcare professionals, the public, and other relevant        |
| 50 |                   |     | groups (eg, via publication, reporting in results databases, or other         |
| 51 |                   |     | data sharing arrangements), including any publication restrictions            |
| 52 |                   |     |                                                                               |
| 53 |                   | 31b | Authorship eligibility guidelines and any intended use of professional        |
| 54 |                   |     | writers                                                                       |
| 55 |                   |     |                                                                               |
| 56 |                   |     |                                                                               |
| 57 |                   | 31c | Plans, if any, for granting public access to the full protocol, participant-  |
| 58 |                   |     | level dataset, and statistical code                                           |
| 59 |                   |     |                                                                               |
| 60 |                   |     |                                                                               |

**Appendices**

|                            |    |                                                                                                                                                                                                |
|----------------------------|----|------------------------------------------------------------------------------------------------------------------------------------------------------------------------------------------------|
| Informed consent materials | 32 | Model consent form and other related documentation given to participants and authorised surrogates                                                                                             |
| Biological specimens       | 33 | Plans for collection, laboratory evaluation, and storage of biological specimens for genetic or molecular analysis in the current trial and for future use in ancillary studies, if applicable |

---

\*It is strongly recommended that this checklist be read in conjunction with the SPIRIT 2013 Explanation & Elaboration for important clarification on the items. Amendments to the protocol should be tracked and dated. The SPIRIT checklist is copyrighted by the SPIRIT Group under the Creative Commons "[Attribution-NonCommercial-NoDerivs 3.0 Unported](#)" license.

For peer review only

# BMJ Open

## Is it feasible to conduct a randomised controlled trial of pre-transplant exercise (pre-habilitation) for multiple myeloma patients awaiting autologous haematopoietic stem cell transplantation? Protocol for the PREeMPT study.

|                                 |                                                                                                                                                                                                                                                                                                                                                                                                                                                                                                                                                                                                                                                                                                                                                                                                                   |
|---------------------------------|-------------------------------------------------------------------------------------------------------------------------------------------------------------------------------------------------------------------------------------------------------------------------------------------------------------------------------------------------------------------------------------------------------------------------------------------------------------------------------------------------------------------------------------------------------------------------------------------------------------------------------------------------------------------------------------------------------------------------------------------------------------------------------------------------------------------|
| Journal:                        | <i>BMJ Open</i>                                                                                                                                                                                                                                                                                                                                                                                                                                                                                                                                                                                                                                                                                                                                                                                                   |
| Manuscript ID                   | bmjopen-2017-021333.R1                                                                                                                                                                                                                                                                                                                                                                                                                                                                                                                                                                                                                                                                                                                                                                                            |
| Article Type:                   | Protocol                                                                                                                                                                                                                                                                                                                                                                                                                                                                                                                                                                                                                                                                                                                                                                                                          |
| Date Submitted by the Author:   | 24-Jan-2018                                                                                                                                                                                                                                                                                                                                                                                                                                                                                                                                                                                                                                                                                                                                                                                                       |
| Complete List of Authors:       | Keen, Carol; Sheffield Teaching Hospitals NHS Foundation Trust, Acute Therapy Services<br>Skilbeck, Julie; Sheffield Hallam University, Nursing<br>Ross, Helen; Sheffield Teaching Hospitals NHS Foundation Trust, Acute Therapy Services<br>Smith, Lauren; Sheffield Teaching Hospitals NHS Foundation Trust, Acute Therapy Services<br>Collins, Karen; Sheffield Hallam University, Centre for Health and Social Care Research<br>Dixey, Joanne; Sheffield Teaching Hospitals NHS Foundation Trust<br>Walters, Stephen; University of Sheffield, SchARR<br>Greenfield, Diana; Sheffield Teaching Hospitals NHS Foundation Trust<br>Snowden, John; Sheffield Teaching Hospitals NHS Foundation Trust, Department of Haematology<br>Mawson, Susan; University of Sheffield, School of Health and Related Research |
| <b>Primary Subject Heading</b>: | Haematology (incl blood transfusion)                                                                                                                                                                                                                                                                                                                                                                                                                                                                                                                                                                                                                                                                                                                                                                              |
| Secondary Subject Heading:      | Rehabilitation medicine                                                                                                                                                                                                                                                                                                                                                                                                                                                                                                                                                                                                                                                                                                                                                                                           |
| Keywords:                       | Myeloma < HAEMATOLOGY, Bone marrow transplantation < HAEMATOLOGY, Rehabilitation medicine < INTERNAL MEDICINE                                                                                                                                                                                                                                                                                                                                                                                                                                                                                                                                                                                                                                                                                                     |
|                                 |                                                                                                                                                                                                                                                                                                                                                                                                                                                                                                                                                                                                                                                                                                                                                                                                                   |

SCHOLARONE™  
Manuscripts

1  
2  
3  
4  
5 **Title:** **Is it feasible to conduct a randomised controlled trial of**  
6 **pre-transplant exercise (pre-habilitation) for multiple**  
7 **myeloma patients awaiting autologous haematopoietic**  
8 **stem cell transplantation? Protocol for the PREeMPT**  
9 **study.**  
10  
11  
12  
13  
14  
15

16  
17 **FUNDING:** This is an original research study funded by NIHR Research for Patient Benefit  
18 (RfPB) funding  
19  
20

21  
22 **AUTHORS:** Carol Keen<sup>(1)</sup>, Julie Skilbeck(JSk)<sup>(2)</sup>, Helen Ross<sup>(1)</sup>, Lauren Smith<sup>(1)</sup>, Karen Collins<sup>(2)</sup>,  
23 Joanne Dixey<sup>(1)</sup>, Stephen Walters<sup>(3)</sup>, Diana M Greenfield<sup>(1,3)</sup>, John A  
24 Snowden(JSn)<sup>(1,3)</sup>, Susan Mawson<sup>(1,3)</sup>  
25  
26

27 (1) Sheffield Teaching Hospitals NHS Foundation Trust

28 (2) Sheffield Hallam University

29 (3) University of Sheffield  
30  
31

32 **CORRESPONDING AUTHOR:**

33 Carol Keen - [carol.keen@sth.nhs.uk](mailto:carol.keen@sth.nhs.uk)  
34  
35  
36  
37  
38  
39  
40  
41  
42  
43  
44  
45  
46  
47  
48  
49  
50  
51  
52  
53  
54  
55  
56  
57

## ABSTRACT

### Introduction:

While myeloma is an incurable malignancy, developments in disease management have led to increased life expectancy in recent years. Treatment typically involves stem-cell transplantation. Increased survival rates equates to more patients living with the burden of both the disease and its treatment for increasing numbers of years, rendering myeloma a long term condition.

Evidence exists to demonstrate the benefits of exercise for patients recovering from stem cell transplantation, and pre-habilitation – exercise before treatment - has been shown to be effective in other disease areas. To date there has been no research into pre-habilitation in myeloma patients awaiting transplantation treatment.

Our objective is to determine whether it is feasible to conduct a randomised controlled trial into pre-transplant exercise for patients with multiple myeloma who are awaiting autologous stem cell transplantation.

### Methods and analysis:

This mixed methods study identifies patients with diagnosis of multiple myeloma who have been assigned to the autologous transplantation list and invites them to participate in 6 weekly sessions of individualised, supervised exercise whilst awaiting transplantation.

Quantitative data to determine feasibility targets include rates of recruitment, adherence and adverse events, and outcome measures including six minute walking distance (6MWD) test and quality of life.

Qualitative interviews are undertaken with a purposive sample of patient to capture their experiences of the study and the intervention.

### Ethics and dissemination:

Ethics committee approval has been obtained. Dissemination will be through open-access publication and presentation and will seek to reach multi-professional bases as well as patient and carer groups, addressing the widespread interest in this area of research.

The study is registered in the clinical trials registry at <https://clinicaltrials.gov/show/NCT03135925>.

## STRENGTHS AND LIMITATIONS

- The sample size for the qualitative aspect of this study is likely to be small – it is intended to inform future study design rather than provide
- For practical reasons, and to encourage patient recruitment, time points for data collection are aligned with clinical interventions, rather than specifically for research purposes. They are therefore subject to variation, and not within the control of the study team.
- As a feasibility study, this will not provide evidence of the effectiveness of pre-habilitation, but will inform future study design for evaluating effectiveness

## INTRODUCTION

Myeloma is an incurable malignancy of antibody producing B lymphocytes and plasma cells. Equating to 7 new cases per 100,000 population in the UK, it represents 10% of all new haematological cancers.<sup>1</sup> Disease symptoms include anaemia and hypercalcaemia causing fatigue and weakness, immunosuppression and lytic lesions of bone increasing pathological fracture risk.<sup>2</sup>

Due to developments in disease management, life expectancy has increased significantly in the last 10 years.<sup>3</sup> The 5 year relative survival rate for England was 42.2% in 2011,<sup>4</sup> and is set to increase further due to earlier interventions in the disease process, more effective chemotherapies and increased use of autologous stem cell transplantation.<sup>5</sup>

Following diagnosis of multiple myeloma, the standard of care treatment for younger patients (generally, but not exclusively, under the age of 70) with adequate fitness consists of an intensive pathway commencing with induction treatment using a variety of regimens delivered as an

1  
2  
3 outpatient or day case given to control disease until maximum response is achieved (usually  
4 reflected by a plateau in serum paraprotein).<sup>6-8</sup> This response is then consolidated with autologous  
5 stem cell transplantation which permits the administration of high dose myeloablative melphalan  
6 chemotherapy, a procedure typically requiring around 3 weeks inpatient care, after which patients  
7 take several months to make a functional recovery.<sup>6-8</sup> The procedure is non-curative and  
8 relapse/progression of myeloma occurs after an average of 2-3 years, which requires re-institution  
9 of induction treatment, and, in many patients, consolidation with a second autologous transplant  
10 procedure.<sup>9,10</sup>

### 11 **Rationale for the study**

12 Increased survival rates equates to more patients living with the burden of both the disease and its  
13 treatment for increasing numbers of years, rendering myeloma a long term condition.<sup>11</sup> The  
14 cumulative effects of the disease, compounded with the debilitating toxic nature of the treatment,  
15 impact significantly on quality of life for patients beyond the end of treatment, with late-effects  
16 symptoms including infection, fatigue, metabolic, neurological and cardiovascular disorders, as well  
17 as pain, physical fitness and psychological concerns.<sup>12</sup>

18  
19 Only 20% of myeloma patients meet national physical activity guidelines post-treatment<sup>12</sup> and  
20 activity declines through treatment due to perceived barriers to exercise including pain, fear of  
21 injury and fatigue.<sup>13</sup> Although research evidence in physical activity has been demonstrated to be  
22 limited,<sup>14</sup> evidence exists to demonstrate the benefits of exercise for patients recovering from stem  
23 cell transplantation.<sup>15</sup> Pre-habilitation after treatment in myeloma patients has been shown to  
24 improve symptoms of physical performance, muscle strength, aerobic capacity, psychological  
25 outcomes immunological function and fatigue.<sup>16</sup> Exercise training for myeloma survivors has been  
26 shown to be safe and feasible during treatment with high attendance and adherence<sup>17</sup> and has been  
27 implement widely in clinical practice.

28  
29 Studies demonstrate that pre-transplant patients have reduced exercise capacity and increased co-  
30 morbidities compared with a normal population, yet most rehabilitative interventions occur during  
31 and after treatment.<sup>15</sup> Thus while exercise rehabilitation after treatment for myeloma can be  
32 effective, we must also consider rehabilitative interventions prior to the start of treatment: pre-  
33 habilitation, defined as,

34  
35 *“a process on the continuum of care that occurs between the time of cancer diagnosis and*  
36 *the beginning of acute treatment ... provides targeted interventions that improve a patient's*  
37 *health to reduce the incidence and the severity of current and future impairments”.*<sup>18</sup>

38  
39 Examples of pre-habilitation exist in other clinical specialties: it has been used for some time in  
40 orthopaedic surgery to improve outcomes and postoperative recovery,<sup>19</sup> and its economic benefits  
41 have been demonstrated within colorectal surgery.<sup>20</sup> A review of pre-habilitation in pre-surgical  
42 cancer patients demonstrated the effective use of aerobic interventions in the management of  
43 patients undergoing thoracic surgery for lung cancer, identified the potential for its use in other  
44 oncology settings and called for further research to evaluate pre-habilitation for wider groups of  
45 cancer patients.<sup>19</sup>

46  
47 Guidelines for the management of late and long terms effects of myeloma recommend that regular  
48 physical activity, including pre-habilitation and rehabilitation, and aspiration to a general healthy  
49 lifestyles, are integral to patient care pathways.<sup>12</sup>

50  
51 Autologous stem cell transplantation in myeloma has become the commonest indication for  
52 transplantation, with, for example, over 1400 performed in the UK annually, and procedures are  
53 performed in what is normally considered an elderly patient population, many with comorbidities  
54 and frailty. It is an intensive toxic procedure, with a recovery period of at least 6 months and  
55 strategies to improve recovery are warranted, including pre-habilitation. A window of opportunity –  
56 usually a period of 4-6 months exists to offer pre-habilitation between diagnosis or relapse and the  
57 commencement of the autologous stem cell transplantation process. Coleman et al.<sup>21</sup> studied 24

multiple myeloma patients undergoing a home based exercise program during chemotherapy and stem cell transplantation and identified that no patient injured themselves and that the intervention had positive effects on lean body weight, fatigue and sleep disturbance. Despite this, no evidence currently exists regarding the use of pre-habilitation exercise interventions in multiple myeloma.

This article describes the protocol for a study underway investigating the feasibility of research into the provision of an exercise intervention in patients with myeloma who are due to receive autologous stem cell transplantation.

## AIMS AND OBJECTIVES

The aim of this study is to determine whether it is feasible to conduct a randomised controlled trial into pre-transplant exercise for patients with multiple myeloma who are awaiting autologous stem cell transplantation.

We will determine this through completion of the following objectives:

1. Assess the acceptability of the study to patients by measuring recruitment and retention to the study and through qualitative interview responses
2. Explore reasons for non-consent to study participation
3. Establish whether a target cohort of patients exists.
4. Determine the most appropriate recruitment points post diagnosis through steering group feedback, recruitment rate when compared with numbers invited to join the study and qualitative interview reports
5. Assess the suitability of inclusion and exclusion criteria by examining recruitment data
6. Assess the acceptability of the intervention through qualitative interviews and retention rates during the study
7. Determine duration of the intervention before transplantation commences by monitoring point of recruitment to the study and time to transplant
8. Explore the appropriateness of outcome measures/completeness by qualitative interview responses, completion rates, time to complete.

## METHODS AND ANALYSIS

### Methodology

Mixed methods, combining qualitative and quantitative data collection and analysis, are used to achieve the described aims and objectives.

### Design

This is a prospective feasibility study – see Figure 1 for study flow chart.

### Setting

Assessments and exercise sessions take place in the physiotherapy outpatient department in an acute hospital trust, which is a regional specialist centre for haematological services. Patient interviews take place in private rooms in the physiotherapy department or over the telephone for patient convenience.

### Feasibility

The feasibility of the intervention is determined through the following targets:

- Recruitment: based on patient numbers at the study site, the recruitment target is 24 patients in a 12 month period (i.e. 2 patients per month);
- Attendance: minimum average attendance at exercise sessions of 66% of the scheduled/invited sessions;
- Retention: 80% patient retention to 6-week follow up assessment;
- Adverse events: adverse events are closely monitored and use to inform decisions to proceed.

1  
2  
3 Acceptability of the intervention to patients is also determined through the qualitative data  
4 collection and analysis, described in a later section.

### 5 **Quantitative Data Collection and Analysis**

6 Data collection will take place between September 2016 and February 2018.

#### 7 Sampling

8 Consecutive sampling is used to recruit patients to this study who have a diagnosis of multiple  
9 myeloma and have been assigned to the autologous transplantation list. The recruiting centre  
10 transplants approximately 70 myeloma patients per year: sampling all patients over a 12 month  
11 period will indicate study recruitment feasibility. This feasibility study did not have a formal sample  
12 size calculation to determine a priori the number of participants to recruit; it aimed to recruit for a  
13 fixed period of time (12 months) at a single centre and one of the outcomes was to estimate the  
14 recruitment rate per month.  
15

#### 16 Inclusion criteria

17 All patients with a diagnosis of multiple myeloma, assigned to the autologous transplantation  
18 waiting list for either a first or second transplant.<sup>22</sup>

#### 19 Exclusion Criteria

20 To allow safe completion of initial objective assessments, patients with a history of unstable angina  
21 or heart attack in the previous month are excluded.<sup>23</sup> Medical stability is a pre-requisite for  
22 transplantation, therefore no patients are excluded on this basis.  
23

#### 24 Recruitment

25 Patients are screened at clinic appointments by the bone marrow transplant team during their  
26 preparation for transplant. Patients meeting the inclusion criteria are provided with verbal and  
27 written information and invited to be involved in the study. Follow-up takes place after 48 hours via  
28 a phone call from a study physiotherapist: any remaining questions are discussed and if the patient  
29 agrees to take part then written consent is obtained and an initial assessment appointment is made.  
30

31 Patients who choose not to join the study are invited to take part in a qualitative interview to  
32 explore their reasoning (Figure 1). This is described in more detail under Qualitative Data Collection  
33 and Analysis.

#### 34 Intervention:

##### 35 *Initial Assessment*

36 Patients attend an initial assessment with a study physiotherapist who undertakes the following:

- 37 • explanation of the pre-habilitation programme
- 38 • documentation of written consent
- 39 • subjective history including co-morbidities and patient goals
- 40 • induction to the gym area equipment
- 41 • provision of booklet and DVD with physical activity advice
- 42 • baseline objective assessment (Table 1)
- 43 • design of individualised gym program in line with patient abilities and goals
- 44 • completion of an initial gym circuit with close supervision.

##### 45 *Weeks 2-5*

46 Patients attend weekly 1 hour physiotherapist-led group gym sessions and complete their  
47 individualised program. Supervision is available as required and programs are progressed in line  
48 with patient ability and performance.  
49

##### 50 *Week 6*

51 Completion of final gym circuit and repeat of objective assessments (Table 1).  
52

##### 53 *Follow up*

54 Patients are followed up on admission for transplant, and again on transplant discharge, for further  
55 repeat of objective assessments (Table 1).  
56  
57



|                        | Recruitment | Initial Assessment | Weeks 2-5 | Week 6 | Transplant Admission | Transplant Discharge |
|------------------------|-------------|--------------------|-----------|--------|----------------------|----------------------|
| Screening data         | ✓           |                    |           |        |                      |                      |
| Demographic data       |             | ✓                  |           |        |                      |                      |
| 6 minute walk distance |             | ✓                  |           | ✓      | ✓                    | ✓                    |
| PROMs                  |             | ✓                  |           | ✓      | ✓                    | ✓                    |
| Activity data          |             | ✓                  | ✓         | ✓      | ✓                    | ✓                    |
| Adverse Events         |             | ✓                  | ✓         | ✓      |                      |                      |

**Table 1 - Study Data Collection**

### Outcome measures

The following data are captured for study participants.

#### *Screening Data*

Through initial screening and recruitment, data is collected on:

- number of patients meeting inclusion criteria
- patients accepting initial study information
- patients agreeing to attend for initial assessment
- reasons for non-participation.

#### *Demographic data*

The following demographic data is captured during the initial assessment:

- gender
- length of diagnosis
- baseline physical activity levels
- transplant history
- pre-transplant therapies received
- time to transplantation from decision to transplant
- other relevant information.

#### *Functional measure*

Patients undertake a 6 minute walk test (6MWD) before and after the exercise intervention. The six minute walk test is a useful field test of functional capacity, is safe to administer and although it has less correlation with peak oxygen capacity than the shuttle walk test, it is better tolerated by patients and is more reflective of activities of daily living as it is a submaximal exercise test.<sup>23</sup> The six minute walk test has been found to be a valid and reliable test in patients with cancer.<sup>24</sup>

#### *Patient Reported Outcome Measures (PROMs)*

As this is a feasibility study, it is useful to determine the feasibility and acceptability of outcomes to be used. For this reason, two different sets of patient reported outcome measures (PROMs) are issued to alternate patients taking part in the study (Table 2). The data collected in the outcome measures and in the qualitative interviews will determine their value in any future studies.

| Group                     | Category      | Measure                                                     |
|---------------------------|---------------|-------------------------------------------------------------|
| Physical activity/fitness | Group 1       | International Physical Activity Questionnaire <sup>25</sup> |
|                           | Group 2       | Godin Leisure Time <sup>26</sup>                            |
| Mental wellbeing          | Group 1 and 2 | Warwick and Edinburgh Mental Well-being Scale <sup>27</sup> |
| Quality of Life           | Group 1       | FACT-MM <sup>28</sup>                                       |

|                            |               |                                                |
|----------------------------|---------------|------------------------------------------------|
|                            | Group 2       | EORTC QLQ C30 MY20 <sup>29</sup>               |
| Self-efficacy for exercise | Group 1 and 2 | Self-Efficacy for Exercise Scale <sup>30</sup> |

**Table 2 - Patient Reported Outcome Measures**

### *Activity Data*

The following activity data is collected for each participant:

- the number of gym attendances
- follow-up compliance
- withdrawals from the study and at which stage of the study these occur
- reasons for withdrawal or non-attendance.

### *Data Collection*

Table 1 shows the full data collection schedule for the study.

### Data Analysis

Flow of participants through the study is captured and the baseline clinical and demographic characteristics of consented participants assessed with appropriate summary statistics.

The data analysis for the feasibility objectives uses descriptive statistics and focuses on confidence interval estimation.

1. The feasibility of recruitment to main trial is assessed with the consent rate (defined as the ratio of no. of consented participants/no. of eligible participants) and its associated 95% confidence interval and the recruitment rate per month and its associated 95% confidence intervals. The target recruitment rate is a minimum of 2 participants per month.
2. Reporting of the number and characteristics of eligible patients approached for the study and reasons for refused consent
3. Reporting of study participant retention rates at six-week follow-up (e.g. participants with a valid 6-minute walk outcome – the probable primary outcome for the main trial) and its associated 95% confidence interval. The target is a minimum of 80% retention to 6-week follow up assessment.
4. Reporting of the number (and rate) of serious adverse events/incidents (and its associated 95% CI) experienced by the participants in the pre-transplantation period. A serious adverse event (SAE) is defined as any adverse event or adverse reaction that results in death, is life-threatening, requires hospitalisation or prolongation of existing hospitalisation, results in persistent or significant disability or incapacity, or is a congenital anomaly or birth defect.
5. Reporting of the decision on primary endpoint for any main trial (current estimate suggests 80% power, two-sided, with n=610 to detect 5% [18m] difference in 6 min walk test with 10% dropout at 12m).

### **Qualitative data collection and analysis**

#### Sampling and Data Collection

The aim of the qualitative data collection and analysis is to explore in greater detail patients' perceptions of the study including its acceptability, as well as barriers and facilitators to participation.

Patients who decline to take part in the exercise trial are asked if they would undertake a short telephone interview to ascertain their reasons for not taking part in the study. Participants who have already consented to take part in the trial and are undertaking the exercise programme are approached by a member of the clinical team and asked if they would be interested in taking part in a series of face-to-face or telephone interviews (Figure 1).

The interview topic guide is informed by evidence regarding acceptability and barriers and facilitators to participation from previous studies in pre-rehabilitation and studies of exercise in patients with multiple myeloma.<sup>17,21</sup> It is also tailored to match developments and areas of interest

1  
2  
3 that emerged from the quantitative data collection as the study progresses. The topic guide is  
4 flexible in order to enable exploration of individual experiences, for example, those who had fully  
5 completed the intervention compared to those who may have had only limited participation.

6 Topic areas include: reasons for non-participation, participants' characteristics and descriptive  
7 information regarding the nature of their disease management to date; the patient experience of  
8 the intervention, with reference to aspects that may impact the design of future study e.g.  
9 recruitment, ease or difficulty of attendance, timing and nature of data collection, suitability of  
10 outcome measures; barriers and enablers to participation in the study.

### 11 Qualitative Analysis

12 The Framework Approach is used to analyse the qualitative data.<sup>31</sup> This method is appropriate for  
13 identifying, analysing, and reporting themes and patterns within data. It is a flexible and useful  
14 research tool, which can potentially provide a rich and detailed, yet simple account of data. Early on  
15 in the analysis the transcripts are repeatedly read to develop an understanding of the breadth and  
16 depth of the data. During this process, data are labelled and coded in an iterative process whereby  
17 patterns and sequences of content over time are identified within and across all the participants.  
18 Emergent themes are further developed and refined by analysing similarities and divergences  
19 between and within the participants, to form a coherent pattern<sup>32</sup>.

## 22 **ETHICS AND DISSEMINATION**

### 23 Ethical Consideration

24 Ethical approval for this study was obtained from NHS Health Research Authority - Yorkshire and  
25 Humber reference 16/YH/0304.

26 Ethical issues relating to informed consent and confidentiality are addressed throughout. It is  
27 acknowledged that patients approached and participating in this study may be physically debilitated  
28 and experiencing anxiety, having received a new cancer diagnosis and awaiting a challenging  
29 programme of treatment. Due care and diligence are taken when consenting potential subjects and  
30 the option to withdraw from the study at any point is reiterated. In particular, the nature of  
31 qualitative interviews, focusing on personal experiences of illness and treatment, may result in some  
32 distress to some participants. The researchers have relevant experience in working with patients  
33 with life-threatening illness and are skilled at talking to them, as well as being able to recognise  
34 patient distress.

### 36 Dissemination

37 This study has involvement from, and relevance to, the professions of physiotherapy, medicine and  
38 nursing. Dissemination will incorporate each of these professions and reach into the wider  
39 healthcare community. We will seek to share the findings of the study through local, national and  
40 international channels.

41 Patient involvement in the project has been through representation in study design and on the  
42 project steering group from the North Trent Cancer Research Network Consumer Research Panel.  
43 We will liaise with this group to invite ideas regarding dissemination to study participants, patients  
44 and carers.

45 Where the findings of the study have implications for the provision of new or existing services to  
46 patients with myeloma, we will ensure dissemination to relevant key opinion leaders and  
47 stakeholders to support decision making.

48 The study is registered in the clinical trials registry at <https://clinicaltrials.gov/show/NCT03135925>.

## 52 **DISCUSSION**

53 It is anticipated that this study will demonstrate the feasibility of conducting research into pre-  
54 habilitation physical activity programmes. Factors likely to affect feasibility may include: patient  
55  
56  
57

perception of role of physical activity; patient time commitments; patient wellness to take part; patient enjoyment of exercise.

If feasibility is confirmed then we will seek to establish a larger scale study to test the efficacy of the intervention. The findings from this study will be used to support power and sample size calculations and to establish suitable outcome measures for future studies.

If the feasibility criteria are not satisfied then there will be lessons to learn regarding the potential for future studies in the field, or modifications to the intervention or study design if further study is indicated. Since pre-habilitation is an area of growing interest in other clinical areas, including other cancer and non-cancer pathologies, then it is anticipated that the findings of this study will also be of interest to practitioners considering pre-habilitation outside of myeloma.

Establishing the feasibility of research in this field is important to explore the case for pre-habilitation. The effects of bone marrow transplantation can have a high cost to the individual and to health services. There is clearly value in exploring treatment options that may lessen the effects of treatment, particularly those with relatively low associated costs such as exercise pre-habilitation.

### CONTRIBUTORS

JD conceived of the idea and secured funding with CK, JSn, KC, DG, SW and SM, who is the Chief Investigator. Ethics and research governance applications were made by SM, CK and HR. JSk, HR and LS provided intellectual input and study design for the final protocol of the study. All authors were involved in drafting or critically revising this work, and in final approval of the version to be published.

### DATA SHARING STATEMENT

As the paper relates to a study protocol, there are no additional data sets available as yet.

### FUNDING

The research was funded by the NIHR Research for Patient Benefit (RfPB) Programme PB-PG-0214-33067. The views expressed are those of the author(s) and not necessarily those of the NHS, the NIHR or the Department of Health.

### FIGURE LEGEND

Figure 1 - Recruitment and Intervention Flow Chart

### REFERENCES

1. Haematological Malignancy Research Network. Myeloma Statistics. Statistics on Individual Disorders. <https://www.hmrn.org/statistics/disorders/24>. Published 2017.
2. Bird JM, Owen RG, D'Sa S, et al. Haemato-cncology Task Force of the British Committee for Standards in Haematology, UK Myeloma Forum: Guidelines for the Diagnosis and Management of Multiple Myeloma. *Br Jouenal Haematol*. 2011;154(1):32-75.
3. Renshaw C, Ketley N, Møller H, Davies EA. Trends in the incidence and survival of multiple myeloma in South East England 1985-2004. *BMC Cancer*. 2010;10(1):74. doi:10.1186/1471-2407-10-74.
4. Cancer Research UK. Myeloma Statistics. About Cancer. <http://www.cancerresearchuk.org/health-professional/cancer-statistics/statistics-by-cancer-type/myeloma>. Published 2017.
5. Kumar SK, Rajkumar S V., Dispenzieri A, et al. Improved survival in multiple myeloma and the impact of novel therapies. *Blood*. 2008;111(5):2516-2520. doi:10.1182/blood-2007-10-116129.
6. Snowden JA, Ahmedzai SH, Ashcroft J, et al. Guidelines for supportive care in multiple

- myeloma 2011. *Br J Haematol.* 2011;154(1):76-103. doi:10.1111/j.1365-2141.2011.08574.x.
7. Bird JM, Owen RG, D'Sa S, et al. Guidelines for the diagnosis and management of multiple myeloma 2011. *Br J Haematol.* 2011;154(1):32-75. doi:10.1111/j.1365-2141.2011.08573.x.
  8. Pratt G, Jenner M, Owen R, et al. Updates to the guidelines for the diagnosis and management of multiple myeloma. *Br J Haematol.* 2014;167(1):131-133. doi:10.1111/bjh.12926.
  9. Cook G, Ashcroft AJ, Cairns DA, et al. The effect of salvage autologous stem-cell transplantation on overall survival in patients with relapsed multiple myeloma (final results from BSBMT/UKMF Myeloma X Relapse [Intensive]): a randomised, open-label, phase 3 trial. *Lancet Haematol.* 2016;3(7):e340-e351. doi:10.1016/S2352-3026(16)30049-7.
  10. Cook G, Williams C, Brown JM, et al. High-dose chemotherapy plus autologous stem-cell transplantation as consolidation therapy in patients with relapsed multiple myeloma after previous autologous stem-cell transplantation (NCRI Myeloma X Relapse [Intensive trial]): a randomised, open-label. *Lancet Oncol.* 2014;15(8):874-885. doi:10.1016/S1470-2045(14)70245-1.
  11. Boland E, Eiser C, Ezaydi Y, Greenfield DM, Ahmedzai SH, Snowden JA. Living With Advanced But Stable Multiple Myeloma: A Study of the Symptom Burden and Cumulative Effects of Disease and Intensive (Hematopoietic Stem Cell Transplant-Based) Treatment on Health-Related Quality of Life. *J Pain Symptom Manage.* 2013;46(5):671-680. doi:10.1016/j.jpainsymman.2012.11.003.
  12. Snowden JA, Greenfield DM, Bird JM, et al. Guidelines for screening and management of late and long-term consequences of myeloma and its treatment. *Br J Haematol.* 2017;176(6):888-907. doi:10.1111/bjh.14514.
  13. Craike MJ, Hose K, Courneya KS, Harrison SJ, Livingston PM. Perceived benefits and barriers to exercise for recently treated patients with multiple myeloma: a qualitative study. *BMC Cancer.* 2013;13(1):319. doi:10.1186/1471-2407-13-319.
  14. Smith L, McCourt O, Henrich M, et al. Multiple myeloma and physical activity: a scoping review. *BMJ Open.* 2015;5(11):e009576. doi:10.1136/bmjopen-2015-009576.
  15. Hoffman R, Mooney K, Barton D, Rothwell E, Le Stayo P, Wong B. Exercise and stem cell transplantation. 2013.
  16. Persoon S, Kersten MJ, ChinAPaw MJ, et al. Design of the EXercise Intervention after Stem cell Transplantation (EXIST) study: a randomized controlled trial to evaluate the effectiveness and cost-effectiveness of an individualized high intensity physical exercise program on fitness and fatigue in p. *BMC Cancer.* 2010;10(1):671. doi:10.1186/1471-2407-10-671.
  17. Groeneveldt L, Mein G, Garrod R, et al. A mixed exercise training programme is feasible and safe and may improve quality of life and muscle strength in multiple myeloma survivors. *BMC Cancer.* 2013;13(1):31. doi:10.1186/1471-2407-13-31.
  18. Silver JK. A journey to make cancer rehabilitation the standard of care. *Work.* 2013;46:473-475.
  19. Silver JK, Baima J. Cancer Prehabilitation. *Am J Phys Med Rehabil.* 2013;92(8):715-727. doi:10.1097/PHM.0b013e31829b4afe.
  20. Lee L, Li C, Landry T, et al. A Systematic Review of Economic Evaluations of Enhanced Recovery Pathways for Colorectal Surgery. *Ann Surg.* 2014;259(4):670-676. doi:10.1097/SLA.0b013e318295fef8.
  21. Coleman E, Coon S, Hall-Barrow J, Richards K, Gaylor D, Stewart B. Feasibility of exercise during treatment for multiple myeloma. *Cancer Nurs.* 2003;26:410-419.
  22. G. Cook; C. Williams; A. Szubert; K. Yong; J. Cavet; H. Hunter; J. Bird; S. Bell; S. O'Connor; J.

- 1  
2  
3 Cavenagh; J. Snowden; C. Parrish; J. Ashcroft; J. Brown; C. Morris. A second autologous stem  
4 cell transplant induces superior response durability following bortezomib-containing  
5 reinduction therapy for relapsed multiple myeloma: results from the BSBMT/UKMF myeloma  
6 x (intensive) trial: O155. *Bone Marrow Transplant*. 2013;48(S17).
- 7  
8 23. Enright PL. The Six-Minute Walk Test. *Respir Care*. 2003;48(8):783-785.
- 9  
10 24. Schmidt, K., Vogt, L., Thiel, C. Jäger, E. Banzwer W. Validity of the six-minute walk test in  
11 cancer patients. *Int J Sports Med*. 2013;34(7):631-636.
- 12  
13 25. Craig C, Marshall A, Bauman A, et al. International Physical Activity Questionnaire: 12-Country  
14 Reliability and Validity. *Med Sci Sport Exerc*. 2003;35(8):1381-1395.  
15 doi:10.1249/01.MSS.0000078924.61453.FB.
- 16  
17 26. Godin G, Shephard RJ. Godin Leisure-Time Exercise Questionnaire. *Med Sci Sports Exerc*.  
18 1997;29:36-38.
- 19  
20 27. Tennant R, Hiller L, Fishwick R, et al. The Warwick-Edinburgh Mental Well-being Scale  
21 (WEMWBS): development and UK validation. *Health Qual Life Outcomes*. 2007;5(1):63.  
22 doi:10.1186/1477-7525-5-63.
- 23  
24 28. Wagner LI, Robinson D, Weiss M, et al. Content Development for the Functional Assessment of  
25 Cancer Therapy-Multiple Myeloma (FACT-MM): Use of Qualitative and Quantitative  
26 Methods for Scale Construction. *J Pain Symptom Manage*. 2012;43(6):1094-1104.  
27 doi:10.1016/j.jpainsymman.2011.06.019.
- 28  
29 29. European Organisation for Research and Treatment of Cancer. EORTC Quality of life  
30 Questionnaire. Quality of Life. <http://groups.eortc.be/qol/eortc-qlq-c30>. Published 2017.
- 31  
32 30. Kroll T, Kehn M, Ho P-S, Groah S. The SCI Exercise Self-Efficacy Scale (ESES): development and  
33 psychometric properties. *Int J Behav Nutr Phys Act*. 2007;4(1):34. doi:10.1186/1479-5868-4-  
34 34.
- 35  
36 31. Ritchie J, Lewis J. *Qualitative Research Practice*. London: Sage; 2003.
- 37  
38 32. Sangster-Gormley E. How case-study research can help to explain implementation of the  
39 nurse practitioner role. *Nurse Res*. 2013;20(4):6-11.  
40 <http://www.ncbi.nlm.nih.gov/pubmed/23520706>.

### COMPETING INTERESTS

Professor Walters reports personal fees from Book Royalties, grants from NIHR and MRC, personal fees from external examining.



Retention and Intervention Flow Chart

209x297mm (300 x 300 DPI)

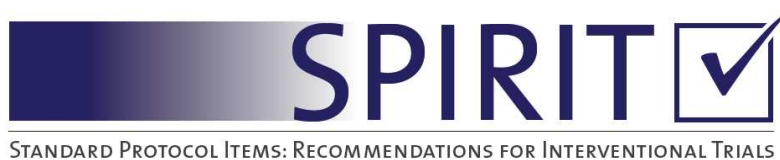

SPIRIT 2013 Checklist: Recommended items to address in a clinical trial protocol and related documents\*

| Section/item                      | Item No | Description                                                                                                                                                                                                                                                                              | Page No |
|-----------------------------------|---------|------------------------------------------------------------------------------------------------------------------------------------------------------------------------------------------------------------------------------------------------------------------------------------------|---------|
| <b>Administrative information</b> |         |                                                                                                                                                                                                                                                                                          |         |
| Title                             | 1       | Descriptive title identifying the study design, population, interventions, and, if applicable, trial acronym                                                                                                                                                                             | 1       |
| Trial registration                | 2a      | Trial identifier and registry name. If not yet registered, name of intended registry                                                                                                                                                                                                     | 2       |
|                                   | 2b      | All items from the World Health Organization Trial Registration Data Set                                                                                                                                                                                                                 | n/a     |
| Protocol version                  | 3       | Date and version identifier                                                                                                                                                                                                                                                              | n/a     |
| Funding                           | 4       | Sources and types of financial, material, and other support                                                                                                                                                                                                                              | 9       |
| Roles and responsibilities        | 5a      | Names, affiliations, and roles of protocol contributors                                                                                                                                                                                                                                  | 9       |
|                                   | 5b      | Name and contact information for the trial sponsor                                                                                                                                                                                                                                       | n/a     |
|                                   | 5c      | Role of study sponsor and funders, if any, in study design; collection, management, analysis, and interpretation of data; writing of the report; and the decision to submit the report for publication, including whether they will have ultimate authority over any of these activities | n/a     |
|                                   | 5d      | Composition, roles, and responsibilities of the coordinating centre, steering committee, endpoint adjudication committee, data management team, and other individuals or groups overseeing the trial, if applicable (see Item 21a for data monitoring committee)                         | n/a     |
| <b>Introduction</b>               |         |                                                                                                                                                                                                                                                                                          |         |
| Background and rationale          | 6a      | Description of research question and justification for undertaking the trial, including summary of relevant studies (published and unpublished) examining benefits and harms for each intervention                                                                                       | 2       |
|                                   | 6b      | Explanation for choice of comparators                                                                                                                                                                                                                                                    | n/a     |
| Objectives                        | 7       | Specific objectives or hypotheses                                                                                                                                                                                                                                                        | 4       |



|    |  |  |  |  |
|----|--|--|--|--|
| 1  |  |  |  |  |
| 2  |  |  |  |  |
| 3  |  |  |  |  |
| 4  |  |  |  |  |
| 5  |  |  |  |  |
| 6  |  |  |  |  |
| 7  |  |  |  |  |
| 8  |  |  |  |  |
| 9  |  |  |  |  |
| 10 |  |  |  |  |
| 11 |  |  |  |  |
| 12 |  |  |  |  |
| 13 |  |  |  |  |
| 14 |  |  |  |  |
| 15 |  |  |  |  |
| 16 |  |  |  |  |
| 17 |  |  |  |  |
| 18 |  |  |  |  |
| 19 |  |  |  |  |
| 20 |  |  |  |  |
| 21 |  |  |  |  |
| 22 |  |  |  |  |
| 23 |  |  |  |  |
| 24 |  |  |  |  |
| 25 |  |  |  |  |
| 26 |  |  |  |  |
| 27 |  |  |  |  |
| 28 |  |  |  |  |
| 29 |  |  |  |  |
| 30 |  |  |  |  |
| 31 |  |  |  |  |
| 32 |  |  |  |  |
| 33 |  |  |  |  |
| 34 |  |  |  |  |
| 35 |  |  |  |  |
| 36 |  |  |  |  |
| 37 |  |  |  |  |
| 38 |  |  |  |  |
| 39 |  |  |  |  |
| 40 |  |  |  |  |
| 41 |  |  |  |  |
| 42 |  |  |  |  |
| 43 |  |  |  |  |
| 44 |  |  |  |  |
| 45 |  |  |  |  |
| 46 |  |  |  |  |
| 47 |  |  |  |  |
| 48 |  |  |  |  |
| 49 |  |  |  |  |
| 50 |  |  |  |  |
| 51 |  |  |  |  |
| 52 |  |  |  |  |
| 53 |  |  |  |  |
| 54 |  |  |  |  |
| 55 |  |  |  |  |
| 56 |  |  |  |  |
| 57 |  |  |  |  |
| 58 |  |  |  |  |
| 59 |  |  |  |  |
| 60 |  |  |  |  |

**Methods: Participants, interventions, and outcomes**

|    |                      |     |                                                                                                                                                                                                                                                                                                                                                                                |     |
|----|----------------------|-----|--------------------------------------------------------------------------------------------------------------------------------------------------------------------------------------------------------------------------------------------------------------------------------------------------------------------------------------------------------------------------------|-----|
| 9  | Study setting        | 9   | Description of study settings (eg, community clinic, academic hospital) and list of countries where data will be collected. Reference to where list of study sites can be obtained                                                                                                                                                                                             | 4   |
| 13 | Eligibility criteria | 10  | Inclusion and exclusion criteria for participants. If applicable, eligibility criteria for study centres and individuals who will perform the interventions (eg, surgeons, psychotherapists)                                                                                                                                                                                   | 5   |
| 17 | Interventions        | 11a | Interventions for each group with sufficient detail to allow replication, including how and when they will be administered                                                                                                                                                                                                                                                     | 5   |
| 21 |                      | 11b | Criteria for discontinuing or modifying allocated interventions for a given trial participant (eg, drug dose change in response to harms, participant request, or improving/worsening disease)                                                                                                                                                                                 | 5   |
| 25 |                      | 11c | Strategies to improve adherence to intervention protocols, and any procedures for monitoring adherence (eg, drug tablet return, laboratory tests)                                                                                                                                                                                                                              | n/a |
| 29 |                      | 11d | Relevant concomitant care and interventions that are permitted or prohibited during the trial                                                                                                                                                                                                                                                                                  | n/a |
| 32 | Outcomes             | 12  | Primary, secondary, and other outcomes, including the specific measurement variable (eg, systolic blood pressure), analysis metric (eg, change from baseline, final value, time to event), method of aggregation (eg, median, proportion), and time point for each outcome. Explanation of the clinical relevance of chosen efficacy and harm outcomes is strongly recommended | 6   |
| 40 | Participant timeline | 13  | Time schedule of enrolment, interventions (including any run-ins and washouts), assessments, and visits for participants. A schematic diagram is highly recommended (see Figure)                                                                                                                                                                                               | 6   |
| 44 | Sample size          | 14  | Estimated number of participants needed to achieve study objectives and how it was determined, including clinical and statistical assumptions supporting any sample size calculations                                                                                                                                                                                          | 7   |
| 48 | Recruitment          | 15  | Strategies for achieving adequate participant enrolment to reach target sample size                                                                                                                                                                                                                                                                                            | 7   |

**Methods: Assignment of interventions (for controlled trials)**

Allocation:

|    |                |     |                                                                    |     |
|----|----------------|-----|--------------------------------------------------------------------|-----|
| 1  |                |     |                                                                    |     |
| 2  | Sequence       | 16a | Method of generating the allocation sequence (eg, computer-        | n/a |
| 3  | generation     |     | generated random numbers), and list of any factors for             |     |
| 4  |                |     | stratification. To reduce predictability of a random sequence,     |     |
| 5  |                |     | details of any planned restriction (eg, blocking) should be        |     |
| 6  |                |     | provided in a separate document that is unavailable to those       |     |
| 7  |                |     | who enrol participants or assign interventions                     |     |
| 8  |                |     |                                                                    |     |
| 9  | Allocation     | 16b | Mechanism of implementing the allocation sequence (eg, central     | n/a |
| 10 | concealment    |     | telephone; sequentially numbered, opaque, sealed envelopes),       |     |
| 11 | mechanism      |     | describing any steps to conceal the sequence until interventions   |     |
| 12 |                |     | are assigned                                                       |     |
| 13 |                |     |                                                                    |     |
| 14 | Implementation | 16c | Who will generate the allocation sequence, who will enrol          | n/a |
| 15 |                |     | participants, and who will assign participants to interventions    |     |
| 16 |                |     |                                                                    |     |
| 17 | Blinding       | 17a | Who will be blinded after assignment to interventions (eg, trial   | n/a |
| 18 | (masking)      |     | participants, care providers, outcome assessors, data analysts),   |     |
| 19 |                |     | and how                                                            |     |
| 20 |                |     |                                                                    |     |
| 21 |                | 17b | If blinded, circumstances under which unblinding is permissible,   | n/a |
| 22 |                |     | and procedure for revealing a participant's allocated intervention |     |
| 23 |                |     | during the trial                                                   |     |
| 24 |                |     |                                                                    |     |
| 25 |                |     |                                                                    |     |

### Methods: Data collection, management, and analysis

|    |                 |     |                                                                        |     |
|----|-----------------|-----|------------------------------------------------------------------------|-----|
| 26 |                 |     |                                                                        |     |
| 27 |                 |     |                                                                        |     |
| 28 | Data collection | 18a | Plans for assessment and collection of outcome, baseline, and          | 7   |
| 29 | methods         |     | other trial data, including any related processes to promote data      |     |
| 30 |                 |     | quality (eg, duplicate measurements, training of assessors) and        |     |
| 31 |                 |     | a description of study instruments (eg, questionnaires,                |     |
| 32 |                 |     | laboratory tests) along with their reliability and validity, if known. |     |
| 33 |                 |     | Reference to where data collection forms can be found, if not in       |     |
| 34 |                 |     | the protocol                                                           |     |
| 35 |                 |     |                                                                        |     |
| 36 |                 | 18b | Plans to promote participant retention and complete follow-up,         | n/a |
| 37 |                 |     | including list of any outcome data to be collected for participants    |     |
| 38 |                 |     | who discontinue or deviate from intervention protocols                 |     |
| 39 |                 |     |                                                                        |     |
| 40 |                 |     |                                                                        |     |
| 41 | Data            | 19  | Plans for data entry, coding, security, and storage, including any     | n/a |
| 42 | management      |     | related processes to promote data quality (eg, double data entry;      |     |
| 43 |                 |     | range checks for data values). Reference to where details of           |     |
| 44 |                 |     | data management procedures can be found, if not in the                 |     |
| 45 |                 |     | protocol                                                               |     |
| 46 |                 |     |                                                                        |     |
| 47 | Statistical     | 20a | Statistical methods for analysing primary and secondary                | 7   |
| 48 | methods         |     | outcomes. Reference to where other details of the statistical          |     |
| 49 |                 |     | analysis plan can be found, if not in the protocol                     |     |
| 50 |                 |     |                                                                        |     |
| 51 |                 | 20b | Methods for any additional analyses (eg, subgroup and adjusted         | n/a |
| 52 |                 |     | analyses)                                                              |     |
| 53 |                 |     |                                                                        |     |
| 54 |                 |     |                                                                        |     |
| 55 |                 |     |                                                                        |     |
| 56 |                 |     |                                                                        |     |
| 57 |                 |     |                                                                        |     |
| 58 |                 |     |                                                                        |     |
| 59 |                 |     |                                                                        |     |
| 60 |                 |     |                                                                        |     |

|    |  |     |                                                             |     |
|----|--|-----|-------------------------------------------------------------|-----|
| 1  |  | 20c | Definition of analysis population relating to protocol non- | n/a |
| 2  |  |     | adherence (eg, as randomised analysis), and any statistical |     |
| 3  |  |     | methods to handle missing data (eg, multiple imputation)    |     |
| 4  |  |     |                                                             |     |
| 5  |  |     |                                                             |     |
| 6  |  |     |                                                             |     |
| 7  |  |     |                                                             |     |
| 8  |  |     |                                                             |     |
| 9  |  |     |                                                             |     |
| 10 |  |     |                                                             |     |
| 11 |  |     |                                                             |     |
| 12 |  |     |                                                             |     |
| 13 |  |     |                                                             |     |
| 14 |  |     |                                                             |     |
| 15 |  |     |                                                             |     |
| 16 |  |     |                                                             |     |
| 17 |  |     |                                                             |     |
| 18 |  |     |                                                             |     |
| 19 |  |     |                                                             |     |
| 20 |  |     |                                                             |     |
| 21 |  |     |                                                             |     |
| 22 |  |     |                                                             |     |
| 23 |  |     |                                                             |     |
| 24 |  |     |                                                             |     |
| 25 |  |     |                                                             |     |
| 26 |  |     |                                                             |     |
| 27 |  |     |                                                             |     |
| 28 |  |     |                                                             |     |
| 29 |  |     |                                                             |     |
| 30 |  |     |                                                             |     |
| 31 |  |     |                                                             |     |
| 32 |  |     |                                                             |     |
| 33 |  |     |                                                             |     |
| 34 |  |     |                                                             |     |
| 35 |  |     |                                                             |     |
| 36 |  |     |                                                             |     |
| 37 |  |     |                                                             |     |
| 38 |  |     |                                                             |     |
| 39 |  |     |                                                             |     |
| 40 |  |     |                                                             |     |
| 41 |  |     |                                                             |     |
| 42 |  |     |                                                             |     |
| 43 |  |     |                                                             |     |
| 44 |  |     |                                                             |     |
| 45 |  |     |                                                             |     |
| 46 |  |     |                                                             |     |
| 47 |  |     |                                                             |     |
| 48 |  |     |                                                             |     |
| 49 |  |     |                                                             |     |
| 50 |  |     |                                                             |     |
| 51 |  |     |                                                             |     |
| 52 |  |     |                                                             |     |
| 53 |  |     |                                                             |     |
| 54 |  |     |                                                             |     |
| 55 |  |     |                                                             |     |
| 56 |  |     |                                                             |     |
| 57 |  |     |                                                             |     |
| 58 |  |     |                                                             |     |
| 59 |  |     |                                                             |     |
| 60 |  |     |                                                             |     |

### Methods: Monitoring

|                 |     |                                                                                                                                                                                                                                                                                                                                       |     |
|-----------------|-----|---------------------------------------------------------------------------------------------------------------------------------------------------------------------------------------------------------------------------------------------------------------------------------------------------------------------------------------|-----|
| Data monitoring | 21a | Composition of data monitoring committee (DMC); summary of its role and reporting structure; statement of whether it is independent from the sponsor and competing interests; and reference to where further details about its charter can be found, if not in the protocol. Alternatively, an explanation of why a DMC is not needed | n/a |
|                 | 21b | Description of any interim analyses and stopping guidelines, including who will have access to these interim results and make the final decision to terminate the trial                                                                                                                                                               | n/a |
| Harms           | 22  | Plans for collecting, assessing, reporting, and managing solicited and spontaneously reported adverse events and other unintended effects of trial interventions or trial conduct                                                                                                                                                     | 7   |
| Auditing        | 23  | Frequency and procedures for auditing trial conduct, if any, and whether the process will be independent from investigators and the sponsor                                                                                                                                                                                           | n/a |

### Ethics and dissemination

|                          |     |                                                                                                                                                                                                                                  |     |
|--------------------------|-----|----------------------------------------------------------------------------------------------------------------------------------------------------------------------------------------------------------------------------------|-----|
| Research ethics approval | 24  | Plans for seeking research ethics committee/institutional review board (REC/IRB) approval                                                                                                                                        | 8   |
| Protocol amendments      | 25  | Plans for communicating important protocol modifications (eg, changes to eligibility criteria, outcomes, analyses) to relevant parties (eg, investigators, REC/IRBs, trial participants, trial registries, journals, regulators) | n/a |
| Consent or assent        | 26a | Who will obtain informed consent or assent from potential trial participants or authorised surrogates, and how (see Item 32)                                                                                                     | 5   |
|                          | 26b | Additional consent provisions for collection and use of participant data and biological specimens in ancillary studies, if applicable                                                                                            | 7   |
| Confidentiality          | 27  | How personal information about potential and enrolled participants will be collected, shared, and maintained in order to protect confidentiality before, during, and after the trial                                             | n/a |
| Declaration of interests | 28  | Financial and other competing interests for principal investigators for the overall trial and each study site                                                                                                                    | 11  |
| Access to data           | 29  | Statement of who will have access to the final trial dataset, and disclosure of contractual agreements that limit such access for investigators                                                                                  | 9   |

|    |                   |     |                                                                      |     |
|----|-------------------|-----|----------------------------------------------------------------------|-----|
| 1  |                   |     |                                                                      |     |
| 2  | Ancillary and     | 30  | Provisions, if any, for ancillary and post-trial care, and for       | n/a |
| 3  | post-trial care   |     | compensation to those who suffer harm from trial participation       |     |
| 4  |                   |     |                                                                      |     |
| 5  | Dissemination     | 31a | Plans for investigators and sponsor to communicate trial results     | 8   |
| 6  | policy            |     | to participants, healthcare professionals, the public, and other     |     |
| 7  |                   |     | relevant groups (eg, via publication, reporting in results           |     |
| 8  |                   |     | databases, or other data sharing arrangements), including any        |     |
| 9  |                   |     | publication restrictions                                             |     |
| 10 |                   |     |                                                                      |     |
| 11 |                   | 31b | Authorship eligibility guidelines and any intended use of            | n/a |
| 12 |                   |     | professional writers                                                 |     |
| 13 |                   |     |                                                                      |     |
| 14 |                   | 31c | Plans, if any, for granting public access to the full protocol,      | n/a |
| 15 |                   |     | participant-level dataset, and statistical code                      |     |
| 16 |                   |     |                                                                      |     |
| 17 | <b>Appendices</b> |     |                                                                      |     |
| 18 |                   |     |                                                                      |     |
| 19 | Informed consent  | 32  | Model consent form and other related documentation given to          | n/a |
| 20 | materials         |     | participants and authorised surrogates                               |     |
| 21 |                   |     |                                                                      |     |
| 22 | Biological        | 33  | Plans for collection, laboratory evaluation, and storage of          | n/a |
| 23 | specimens         |     | biological specimens for genetic or molecular analysis in the        |     |
| 24 |                   |     | current trial and for future use in ancillary studies, if applicable |     |
| 25 |                   |     |                                                                      |     |

\*It is strongly recommended that this checklist be read in conjunction with the SPIRIT 2013 Explanation & Elaboration for important clarification on the items. Amendments to the protocol should be tracked and dated. The SPIRIT checklist is copyrighted by the SPIRIT Group under the Creative Commons "[Attribution-NonCommercial-NoDerivs 3.0 Unported](https://creativecommons.org/licenses/by-nc-nd/3.0/)" license.

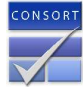

## CONSORT 2010 checklist of information to include when reporting a pilot or feasibility trial\*

| Section/Topic                    | Item No | Checklist item                                                                                                                                                                              | Reported on page No |
|----------------------------------|---------|---------------------------------------------------------------------------------------------------------------------------------------------------------------------------------------------|---------------------|
| <b>Title and abstract</b>        |         |                                                                                                                                                                                             |                     |
|                                  | 1a      | Identification as a pilot or feasibility randomised trial in the title                                                                                                                      | 1                   |
|                                  | 1b      | Structured summary of pilot trial design, methods, results, and conclusions (for specific guidance see CONSORT abstract extension for pilot trials)                                         | 1                   |
| <b>Introduction</b>              |         |                                                                                                                                                                                             |                     |
| Background and objectives        | 2a      | Scientific background and explanation of rationale for future definitive trial, and reasons for randomised pilot trial                                                                      | 3                   |
|                                  | 2b      | Specific objectives or research questions for pilot trial                                                                                                                                   | 4                   |
| <b>Methods</b>                   |         |                                                                                                                                                                                             |                     |
| Trial design                     | 3a      | Description of pilot trial design (such as parallel, factorial) including allocation ratio                                                                                                  | 4                   |
|                                  | 3b      | Important changes to methods after pilot trial commencement (such as eligibility criteria), with reasons                                                                                    | n/a                 |
| Participants                     | 4a      | Eligibility criteria for participants                                                                                                                                                       | 5                   |
|                                  | 4b      | Settings and locations where the data were collected                                                                                                                                        | 4                   |
|                                  | 4c      | How participants were identified and consented                                                                                                                                              | 5                   |
| Interventions                    | 5       | The interventions for each group with sufficient details to allow replication, including how and when they were actually administered                                                       | 5                   |
| Outcomes                         | 6a      | Completely defined prespecified assessments or measurements to address each pilot trial objective specified in 2b, including how and when they were assessed                                | 6                   |
|                                  | 6b      | Any changes to pilot trial assessments or measurements after the pilot trial commenced, with reasons                                                                                        | n/a                 |
|                                  | 6c      | If applicable, prespecified criteria used to judge whether, or how, to proceed with future definitive trial                                                                                 | 4,7                 |
| Sample size                      | 7a      | Rationale for numbers in the pilot trial                                                                                                                                                    | 7                   |
|                                  | 7b      | When applicable, explanation of any interim analyses and stopping guidelines                                                                                                                | n/a                 |
| Randomisation:                   |         |                                                                                                                                                                                             |                     |
| Sequence generation              | 8a      | Method used to generate the random allocation sequence                                                                                                                                      | n/a                 |
|                                  | 8b      | Type of randomisation(s); details of any restriction (such as blocking and block size)                                                                                                      | n/a                 |
| Allocation concealment mechanism | 9       | Mechanism used to implement the random allocation sequence (such as sequentially numbered containers), describing any steps taken to conceal the sequence until interventions were assigned | n/a                 |

|                                                      |     |                                                                                                                                                                                       |     |
|------------------------------------------------------|-----|---------------------------------------------------------------------------------------------------------------------------------------------------------------------------------------|-----|
| Implementation                                       | 10  | Who generated the random allocation sequence, who enrolled participants, and who assigned participants to interventions                                                               | n/a |
| Blinding                                             | 11a | If done, who was blinded after assignment to interventions (for example, participants, care providers, those assessing outcomes) and how                                              | n/a |
|                                                      | 11b | If relevant, description of the similarity of interventions                                                                                                                           | n/a |
| Statistical methods                                  | 12  | Methods used to address each pilot trial objective whether qualitative or quantitative                                                                                                | 7   |
| <b>Results</b>                                       |     |                                                                                                                                                                                       |     |
| Participant flow (a diagram is strongly recommended) | 13a | For each group, the numbers of participants who were approached and/or assessed for eligibility, randomly assigned, received intended treatment, and were assessed for each objective | n/a |
|                                                      | 13b | For each group, losses and exclusions after randomisation, together with reasons                                                                                                      | n/a |
| Recruitment                                          | 14a | Dates defining the periods of recruitment and follow-up                                                                                                                               | n/a |
|                                                      | 14b | Why the pilot trial ended or was stopped                                                                                                                                              | n/a |
| Baseline data                                        | 15  | A table showing baseline demographic and clinical characteristics for each group                                                                                                      | n/a |
| Numbers analysed                                     | 16  | For each objective, number of participants (denominator) included in each analysis. If relevant, these numbers should be by randomised group                                          | n/a |
| Outcomes and estimation                              | 17  | For each objective, results including expressions of uncertainty (such as 95% confidence interval) for any estimates. If relevant, these results should be by randomised group        | n/a |
| Ancillary analyses                                   | 18  | Results of any other analyses performed that could be used to inform the future definitive trial                                                                                      | n/a |
| Harms                                                | 19  | All important harms or unintended effects in each group (for specific guidance see CONSORT for harms)                                                                                 | n/a |
|                                                      | 19a | If relevant, other important unintended consequences                                                                                                                                  | n/a |
| <b>Discussion</b>                                    |     |                                                                                                                                                                                       |     |
| Limitations                                          | 20  | Pilot trial limitations, addressing sources of potential bias and remaining uncertainty about feasibility                                                                             | n/a |
| Generalisability                                     | 21  | Generalisability (applicability) of pilot trial methods and findings to future definitive trial and other studies                                                                     | n/a |
| Interpretation                                       | 22  | Interpretation consistent with pilot trial objectives and findings, balancing potential benefits and harms, and considering other relevant evidence                                   | n/a |
|                                                      | 22a | Implications for progression from pilot to future definitive trial, including any proposed amendments                                                                                 | n/a |
| <b>Other information</b>                             |     |                                                                                                                                                                                       |     |
| Registration                                         | 23  | Registration number for pilot trial and name of trial registry                                                                                                                        | 2   |
| Protocol                                             | 24  | Where the pilot trial protocol can be accessed, if available                                                                                                                          | n/a |
| Funding                                              | 25  | Sources of funding and other support (such as supply of drugs), role of funders                                                                                                       | 9   |
|                                                      | 26  | Ethical approval or approval by research review committee, confirmed with reference number                                                                                            | 8   |

1  
2 Citation: Eldridge SM, Chan CL, Campbell MJ, Bond CM, Hopewell S, Thabane L, et al. CONSORT 2010 statement: extension to randomised pilot and feasibility trials. BMJ. 2016;355.  
3 \*We strongly recommend reading this statement in conjunction with the CONSORT 2010, extension to randomised pilot and feasibility trials, Explanation and Elaboration for important  
4 clarifications on all the items. If relevant, we also recommend reading CONSORT extensions for cluster randomised trials, non-inferiority and equivalence trials, non-pharmacological  
5 treatments, herbal interventions, and pragmatic trials. Additional extensions are forthcoming: for those and for up to date references relevant to this checklist, see [www.consort-statement.org](http://www.consort-statement.org).  
6  
7  
8  
9  
10  
11  
12  
13  
14  
15  
16  
17  
18  
19  
20  
21  
22  
23  
24  
25  
26  
27  
28  
29  
30  
31  
32  
33  
34  
35  
36  
37  
38  
39  
40  
41  
42  
43  
44  
45  
46  
47

For peer review only
